# Supplementary material for: Z-Selective semihydrogenation of alkynes via Ni/Lewis acid synergistic catalyzed system using DMF as hydrogen source and solvent
Source: publisher site journal article supplement (doi:10.3762/bjoc.22.79), 2026-06-30

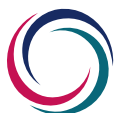

## Supporting Information

for

### **Z-Selective semihydrogenation of alkynes via Ni/Lewis acid synergistic catalyzed system using DMF as hydrogen source and solvent**

Lei Kang, Haifeng Gao and Luo Yang

*Beilstein J. Org. Chem.* **2026**, *22*, 1004–1012. [doi:10.3762/bjoc.22.79](https://doi.org/10.3762/bjoc.22.79)

### **Experimental procedure, compound characterization data, and copies of spectra**

## 1. General information

Thin-layer chromatography (TLC) was performed using E. Merck Silica Gel 60 F254 precoated plates (0.25 mm). The developed chromatography plates were analyzed by a UV lamp (254 nm). Nuclear magnetic resonance (NMR) spectra were recorded on a Bruker Avance 400 spectrometer at ambient temperature. Chemical shifts for  $^1\text{H}$  NMR spectra are reported in parts per million (ppm) from tetramethylsilane with the solvent resonance as the internal standard (chloroform:  $\delta$  7.26 ppm). Chemical shifts for  $^{13}\text{C}$  NMR spectra are reported in parts per million (ppm) from tetramethylsilane with the solvent as the internal standard ( $\text{CDCl}_3$ :  $\delta$  77.16 ppm). Data are reported as follows: chemical shift, multiplicity (s = singlet, d = doublet, dd = doublet of doublets, t = triplet, q = quartet, m = multiplet, br = broad signal), coupling constant (Hz), and integration. The *Z/E* stereoisomeric ratio of the product was determined by gas chromatography (GC) analysis of the crude reaction mixture.

## 2. Experimental section

An oven-dried reaction vessel was charged with diphenylacetylene (0.2 mmol, 35.6 mg),  $\text{Zn}(\text{OAc})_2 \cdot 2\text{H}_2\text{O}$  (50 mol %, 22 mg), and  $\text{NiCl}_2$  (20 mol %, 3.3 mg). DMF (0.8 mL) was then added, the vessel was sealed, and the mixture was stirred and heated at 150 °C (oil bath temperature) for 24 h. The reaction was monitored by GC analysis; upon complete consumption of the starting material, heating was discontinued. After cooling to room temperature, the volatiles were removed under reduced pressure. The resulting crude residue was purified by flash column chromatography on silica gel (eluent: petroleum ether) to afford pure (*Z*)-stilbene (**2a**) as a colorless solid in 95% isolated yield (34.4 mg). The *Z/E* ratio (98:2) was determined by GC analysis of the crude mixture.

### 3. Characterization data of products 2a–p

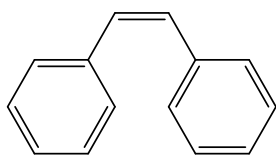

(2a)<sup>1</sup>

2a

Yellow oil. <sup>1</sup>H NMR (400 MHz, CDCl<sub>3</sub>, TMS) δ 7.24–7.17 (m, 10H), 6.60 (s, 2H);

<sup>13</sup>C NMR (100 MHz, CDCl<sub>3</sub>) δ 137.35, 130.37, 128.99, 128.33, 127.21.

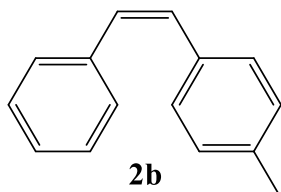

(2b)<sup>2</sup>

2b

<sup>1</sup>H NMR (400 MHz, CDCl<sub>3</sub>, TMS) δ 7.30 – 7.17 (m, 5H), 7.17 – 7.10 (m, 2H), 7.02 (d, *J* = 7.9 Hz, 2H), 6.55 (s, 2H), 2.31 (s, 3H).

<sup>13</sup>C NMR (100 MHz, CDCl<sub>3</sub>) δ 137.53, 136.90, 134.29, 130.23, 129.58, 128.94, 128.88, 128.82, 128.22, 127.00, 21.27.

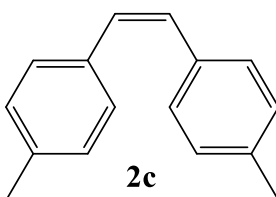

(2c)<sup>1</sup>

2c

<sup>1</sup>H NMR (400 MHz, CDCl<sub>3</sub>, TMS) δ 7.16 (d, 4H, *J* = 8.2 Hz), 7.03 (d, 4H, *J* = 7.9 Hz), 6.51 (s, 2H), 2.31 (s, 6H);

<sup>13</sup>C NMR (100 MHz, CDCl<sub>3</sub>) δ 136.75, 134.51, 129.53, 128.90, 128.77, 21.26.

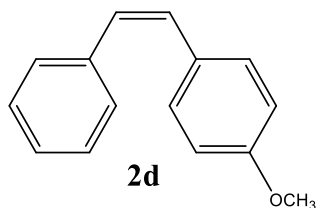

(2d)<sup>1</sup>

2d

<sup>1</sup>H NMR (400 MHz, CDCl<sub>3</sub>, TMS) δ 7.50 – 6.91 (m, 7H), 6.75 (d, *J* = 8.8 Hz, 2H), 6.52 (d, *J* = 1.8 Hz, 2H), 3.78 (s, 3H).

<sup>13</sup>C NMR (100 MHz, CDCl<sub>3</sub>) δ 158.69, 137.64, 130.17, 129.79, 129.68, 128.84, 128.78, 128.25, 126.92, 113.61, 55.21.

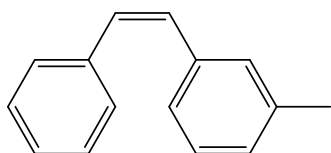

**(2e)<sup>2</sup>**

**2e**

<sup>1</sup>H NMR (400 MHz, CDCl<sub>3</sub>) δ 7.34 – 7.17 (m, 5H), 7.09 (m, 4H), 6.60 (s, 2H), 2.29 (s, 3H).

<sup>13</sup>C NMR (100 MHz, CDCl<sub>3</sub>) δ 137.84, 137.41, 137.27, 130.45, 130.16, 129.69, 128.97, 128.24, 128.17, 127.94, 127.14, 125.96, 21.43.

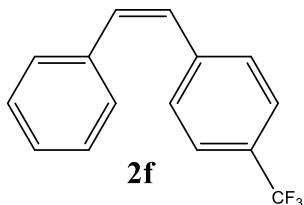

**(2f)<sup>2,3</sup>**

**2f**

<sup>1</sup>H NMR (400 MHz, CDCl<sub>3</sub>) δ 7.47 (d, *J* = 8.2 Hz, 2H), 7.34 (d, *J* = 8.4 Hz, 2H), 7.30 – 7.17 (m, 5H), 6.73 (d, *J* = 12.3 Hz, 1H), 6.60 (d, *J* = 12.3 Hz, 1H).

<sup>13</sup>C NMR (100 MHz, CDCl<sub>3</sub>) δ 140.92, 136.56, 132.34, 129.14, 128.82, 128.75, 128.43, 127.58, 125.16 (q, *J*<sub>1</sub> = 3.7, *J*<sub>2</sub> = 3.8 Hz), 122.83.

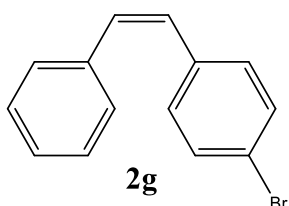

**(2g)<sup>4</sup>**

**2g**

<sup>1</sup>H NMR (400 MHz, CDCl<sub>3</sub>) δ 7.34 (d, *J* = 8.4 Hz, 2H), 7.25 – 7.20 (m, 5H), 7.10 (d, *J* = 8.3 Hz, 2H), 6.63 (d, *J* = 12.2 Hz, 1H), 6.50 (d, *J* = 12.2 Hz, 1H).

<sup>13</sup>C NMR (100 MHz, CDCl<sub>3</sub>) δ 136.86, 136.14, 131.39, 131.07, 130.57, 128.97, 128.83, 128.38, 127.38, 120.96.

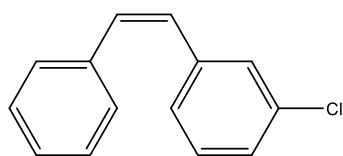

**(2h)<sup>2</sup>**

**2h**

<sup>1</sup>H NMR (400 MHz, CDCl<sub>3</sub>) δ 7.35 – 7.03 (m, 9H), 6.68 (d, *J* = 12.2 Hz, 1H), 6.55 (d, *J* = 12.2 Hz, 1H).

<sup>13</sup>C NMR (100 MHz, CDCl<sub>3</sub>) δ 139.17, 136.68, 134.13, 131.64, 129.50, 128.91, 128.89, 128.78, 128.40, 127.52, 127.20, 127.07.

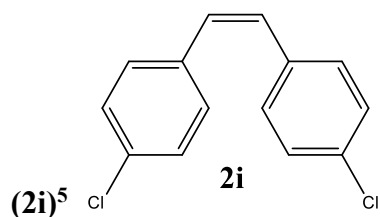

<sup>1</sup>H NMR (400 MHz, CDCl<sub>3</sub>) δ 7.23 (d, *J* = 8.5 Hz, 4H), 7.17 (d, *J* = 8.4 Hz, 4H), 6.58 (s, 2H).

<sup>13</sup>C NMR (100 MHz, CDCl<sub>3</sub>) δ 135.29, 133.06, 130.17, 129.64, 128.58.

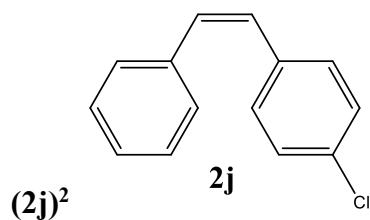

<sup>1</sup>H NMR (400 MHz, CDCl<sub>3</sub>) δ 7.35 – 7.08 (m, 9H), 6.62 (d, *J* = 12.2 Hz, 1H), 6.53 (d, *J* = 12.2 Hz, 1H).

<sup>13</sup>C NMR (100 MHz, CDCl<sub>3</sub>) δ 136.90, 135.68, 132.77, 130.98, 130.25, 128.95, 128.84, 128.44, 128.37, 127.35.

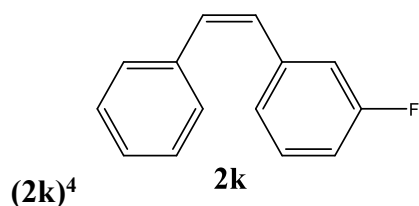

<sup>1</sup>H NMR (400 MHz, CDCl<sub>3</sub>) δ 7.27 – 7.12 (m, 6H), 7.01 (d, *J* = 7.7 Hz, 1H), 6.97 – 6.83 (m, 2H), 6.65 (d, *J* = 12.2 Hz, 1H), 6.54 (d, *J* = 12.2 Hz, 1H).

<sup>13</sup>C NMR (100 MHz, CDCl<sub>3</sub>) δ 162.73 (d, *J* = 245.2 Hz), 139.51 (d, *J* = 7.8 Hz), 129.69 (d, *J* = 8.4 Hz), 129.00 (d, *J* = 2.2 Hz), 115.56 (d, *J* = 21.7 Hz), 114.01 (d, *J* = 21.2 Hz).

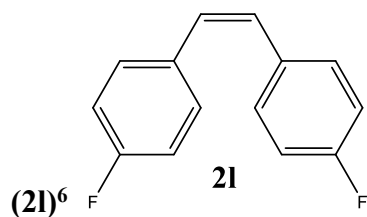

<sup>1</sup>H NMR (400 MHz, CDCl<sub>3</sub>) δ 7.29 – 7.07 (m, 4H), 7.00 – 6.83 (m, 4H), 6.54 (s, 2H).

<sup>13</sup>C NMR (100 MHz, CDCl<sub>3</sub>) δ 161.87 (d, *J* = 246.9 Hz), 132.98 (d, *J* = 3.4 Hz), 130.50 (d, *J* = 7.9 Hz), 129.11 (d, *J* = 1.2 Hz), 115.28 (d, *J* = 21.4 Hz).

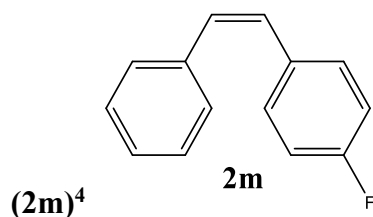

<sup>1</sup>H NMR (400 MHz, CDCl<sub>3</sub>) δ 7.27 – 7.16 (m, 7H), 6.95 – 6.85 (m, 2H), 6.59 (d, *J* = 12.2 Hz, 1H), 6.53 (d, *J* = 12.2 Hz, 1H).

<sup>13</sup>C NMR (100 MHz, CDCl<sub>3</sub>) δ 161.85 (d, *J* = 246.7 Hz), 133.21 (d, *J* = 3.4 Hz), 130.56 (d, *J* = 7.8 Hz), 130.28 (d, *J* = 1.0 Hz), 115.18 (d, *J* = 21.4 Hz).

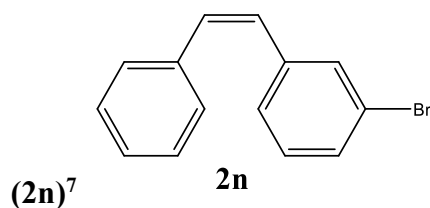

<sup>1</sup>H NMR (400 MHz, CDCl<sub>3</sub>) δ 7.39 – 7.05 (m, 9H), 6.64 (d, *J* = 12.2 Hz, 1H), 6.51 (d, *J* = 12.2 Hz, 1H).

<sup>13</sup>C NMR (100 MHz, CDCl<sub>3</sub>) δ 139.45, 136.61, 131.79, 131.66, 130.08, 129.74, 128.86, 128.64, 128.36, 127.51, 127.47, 122.31.

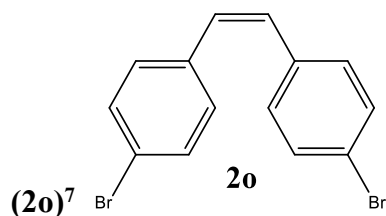

<sup>1</sup>H NMR (400 MHz, CDCl<sub>3</sub>) δ 7.36 (d, *J* = 8.5 Hz, 4H), 7.08 (d, *J* = 8.5 Hz, 4H), 6.54 (s, 2H).

<sup>13</sup>C NMR (100 MHz, CDCl<sub>3</sub>) δ 135.70, 131.68, 131.54, 130.47, 129.73, 121.25.

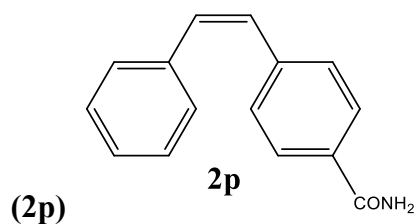

<sup>1</sup>H NMR (400 MHz, CDCl<sub>3</sub>) δ 7.66 (d, *J* = 8.3 Hz, 2H), 7.30 (d, *J* = 8.1 Hz, 2H), 7.28 – 7.12 (m, 5H), 6.70 (d, *J* = 12.2 Hz, 1H), 6.59 (d, *J* = 12.2 Hz, 1H), 5.93 (d, *J* = 94.6 Hz, 2H).

<sup>13</sup>C NMR (100 MHz, CDCl<sub>3</sub>) δ 169.47, 141.20, 136.70, 132.10, 131.76, 129.10, 128.88, 128.39, 127.53, 127.38.

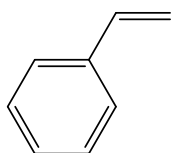

**(4a)<sup>5</sup>** **4a**

<sup>1</sup>H NMR (400 MHz, CDCl<sub>3</sub>) δ 7.41 – 7.22 (m, 4H), 6.75 – 6.66 (m, 1H), 5.74 (d, *J* = 17.6 Hz, 1H), 5.23 (d, *J* = 11.0 Hz, 1H).

<sup>13</sup>C NMR (100 MHz, CDCl<sub>3</sub>) δ 137.70, 137.02, 128.66, 127.94, 126.35, 113.94.

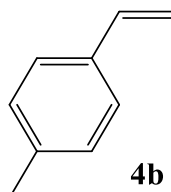

**(4b)<sup>8</sup>** **4b**

<sup>1</sup>H NMR (400 MHz, CDCl<sub>3</sub>) δ 7.30 (d, *J* = 6.3 Hz, 2H), 7.12 (d, *J* = 6.6 Hz, 2H), 6.80 – 6.58 (m, 1H), 5.69 (d, *J* = 17.7 Hz, 1H), 5.18 (d, *J* = 10.9 Hz, 1H), 2.33 (s, 3H).

<sup>13</sup>C NMR (100 MHz, CDCl<sub>3</sub>) δ 137.74, 136.84, 134.95, 129.35, 126.25, 112.89, 21.34.

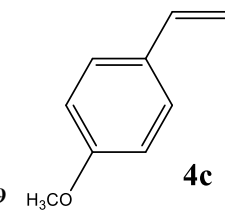

**(4c)<sup>5,9</sup>** **4c**

<sup>1</sup>H NMR (400 MHz, CDCl<sub>3</sub>) δ 7.34 (d, *J* = 8.9 Hz, 2H), 6.85 (d, *J* = 8.9 Hz, 2H), 6.65 (dd, *J* = 17.7, 10.9 Hz, 1H), 5.60 (d, *J* = 17.7 Hz, 1H), 5.12 (d, *J* = 11.9 Hz, 1H), 3.79 (s, 3H).

<sup>13</sup>C NMR (100 MHz, CDCl<sub>3</sub>) δ 159.49, 136.34, 130.54, 127.50, 114.02, 111.68, 55.38.

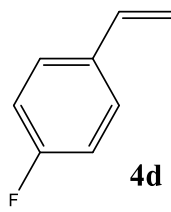

**(4d)<sup>9</sup>** **4d**

<sup>1</sup>H NMR (400 MHz, CDCl<sub>3</sub>) δ 7.36 (dd, *J* = 8.9, 5.3 Hz, 2H), 7.05 – 6.94 (m, 2H), 6.67 (dd, *J* = 17.6, 10.9 Hz, 1H), 5.65 (d, *J* = 17.6 Hz, 1H), 5.21 (d, *J* = 10.9 Hz, 1H).

<sup>13</sup>C NMR (100 MHz, CDCl<sub>3</sub>) δ 162.58 (d, *J* = 246.6 Hz), 135.79, 133.84 (d, *J* = 3.4 Hz), 127.84 (d, *J* = 8.2 Hz), 115.51 (d, *J* = 21.7 Hz), 113.62 (d, *J* = 2.4 Hz).

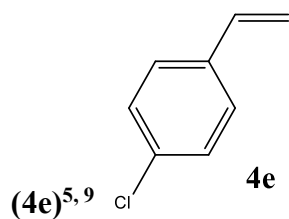

<sup>1</sup>H NMR (400 MHz, CDCl<sub>3</sub>) δ 7.30 (q, *J* = 8.7 Hz, 4H), 6.65 (dd, *J* = 17.6, 10.9 Hz, 1H), 5.71 (dd, *J* = 17.6, 0.8 Hz, 1H), 5.25 (dd, *J* = 10.9, 0.7 Hz, 1H).

<sup>13</sup>C NMR (100 MHz, CDCl<sub>3</sub>) δ 136.14, 135.78, 133.54, 128.79, 127.55, 114.57.

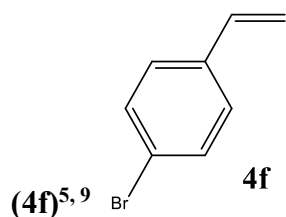

<sup>1</sup>H NMR (400 MHz, CDCl<sub>3</sub>) δ 7.43 (d, *J* = 8.4 Hz, 2H), 7.25 (d, *J* = 11.0 Hz, 2H), 6.63 (dd, *J* = 17.6, 10.9 Hz, 1H), 5.72 (d, *J* = 17.6 Hz, 1H), 5.26 (d, *J* = 10.9 Hz, 1H).

<sup>13</sup>C NMR (100 MHz, CDCl<sub>3</sub>) δ 136.57, 135.84, 131.74, 127.88, 121.72, 114.73.

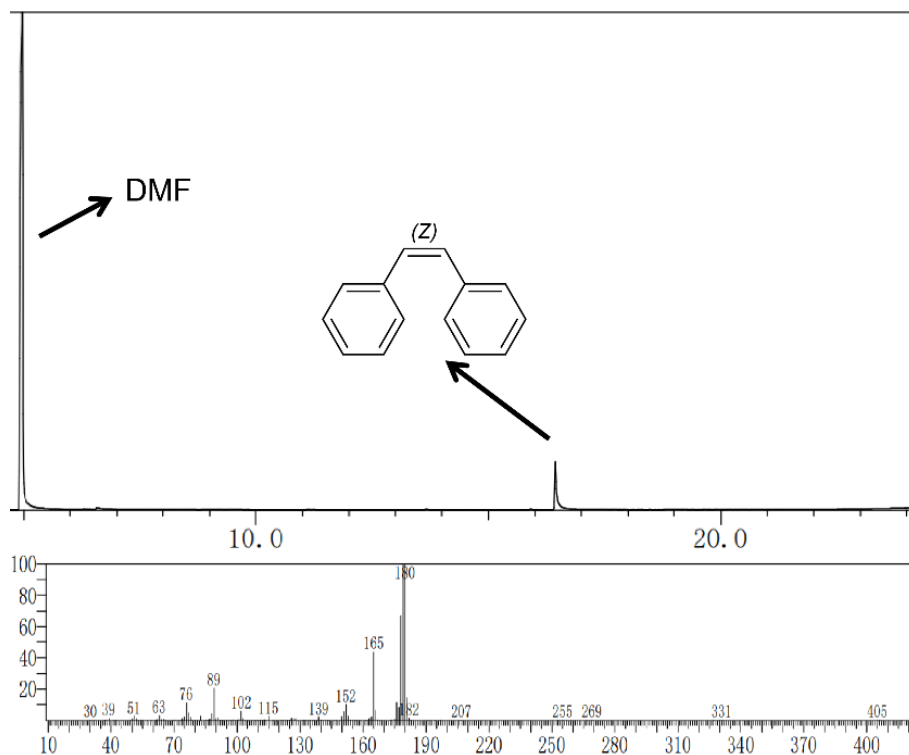

**Figure S1:** GC–MS chromatogram of diphenylacetylene reaction mixture after 48 h under standard conditions, showing no significant change in the (Z)-stilbene peak relative to the 24 h reaction. The peak labeled “DMF” corresponds to the solvent.

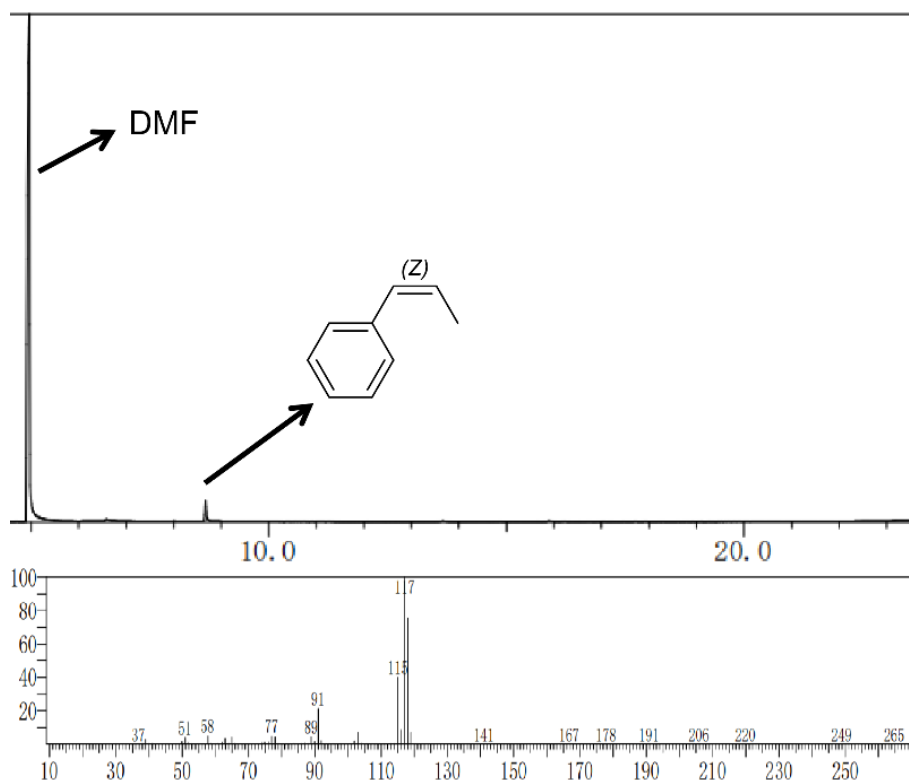

**Figure S2:** GC–MS chromatogram of the reaction mixture from 1-phenyl-1-propyne under standard conditions, showing complete conversion to (*Z*)-1-phenyl-1-propene ( $m/z = 117$ ). The peak labeled “DMF” corresponds to the solvent.

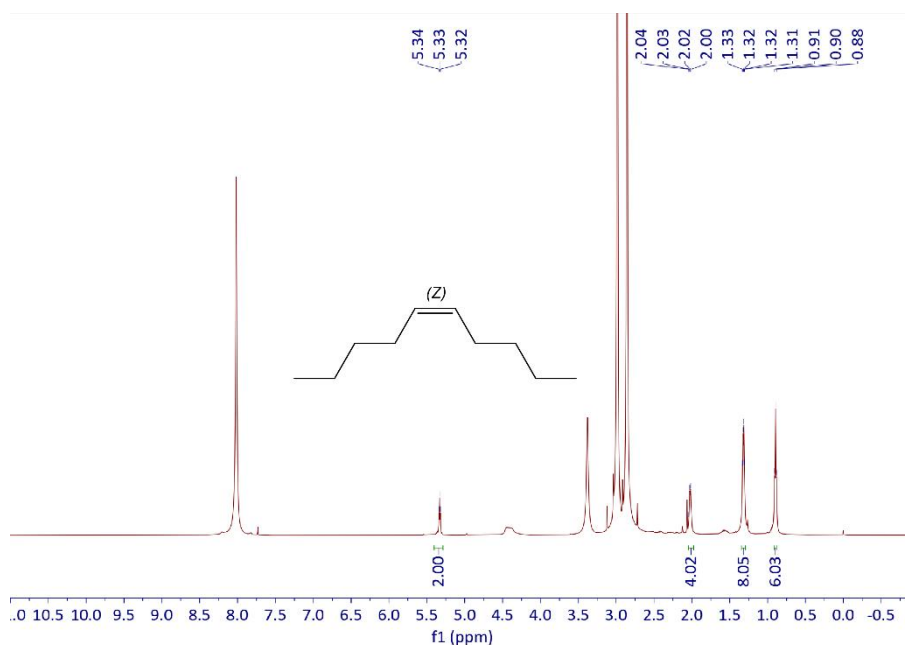

**Figure S3:**  $^1\text{H}$  NMR spectrum of crude reaction mixture from 5-decyne after 24 h reaction, confirming the formation of (*Z*)-5-decene<sup>1</sup>. (After 24 h of catalytic reaction, the crude mixture was extracted with  $\text{CDCl}_3$  for  $^1\text{H}$  NMR measurement.)

## References

- (1) Li, J.; Hua, R.; Liu, T. *Journal of Organic Chemistry* **2010**, *75* (9), 2966-2970.  
DOI: 10.1021/jo100247a.
- (2) Fu, S.; Chen, N.-Y.; Liu, X.; Shao, Z.; Luo, S.-P.; Liu, Q. *Journal of the American Chemical Society* **2016**, *138* (27), 8588-8594. DOI: 10.1021/jacs.6b04271.
- (3) Wen, X.; Shi, X.; Qiao, X.; Wu, Z.; Bai, G. *Chemical Communications* **2017**, *53* (39), 5372-5375, 10.1039/C7CC02140B. DOI: 10.1039/C7CC02140B.
- (4) Das, M.; O'Shea, D. F. *Organic Letters* **2016**, *18* (2), 336-339.  
DOI: 10.1021/acs.orglett.5b03519.
- (5) Xia, S.; Peng, J.; Xie, S.; Xu, T.; Li, L.; Liu, X.; Cao, D.; He, L.-N.; Li, C.-J. *Organic Letters* **2025**, *27* (21), 5423-5428. DOI: 10.1021/acs.orglett.5c01372.
- (6) Sheikh Mohammad, T.; Sakharov, P.; Raje, S.; de Ruiter, G. *ACS Catalysis* **2025**, *15* (7), 5370-5377. DOI: 10.1021/acscatal.5c00792.
- (7) Chen, X.-B.; Zhang, J.; Sun, D.-Q.; Chen, K.-Q.; Chen, X.-Y. *Synthesis* **2025**, *57* (12), 1928-1935. DOI: 10.1055/a-2502-8374.
- (8) Wang, Y.-H.; Liu, S.-T. *Polyhedron* **2025**, *265*, 117276.  
DOI: <https://doi.org/10.1016/j.poly.2024.117276>.
- (9) Yan, Y.; Wang, P.; Han, J.; Wang, A.; Zhang, G.; Tian, Y.; Ge, Y.; Gao, W.; Wang, L.; Liu, Z.; et al. *Chemical Communications* **2025**, *61* (30), 5661-5664, 10.1039/D4CC06623E.  
DOI: 10.1039/D4CC06623E.

7.240  
7.224  
7.223  
7.205  
7.193  
7.184  
— 6.600

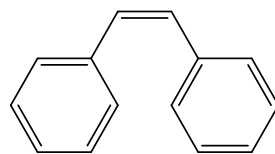

**2a**

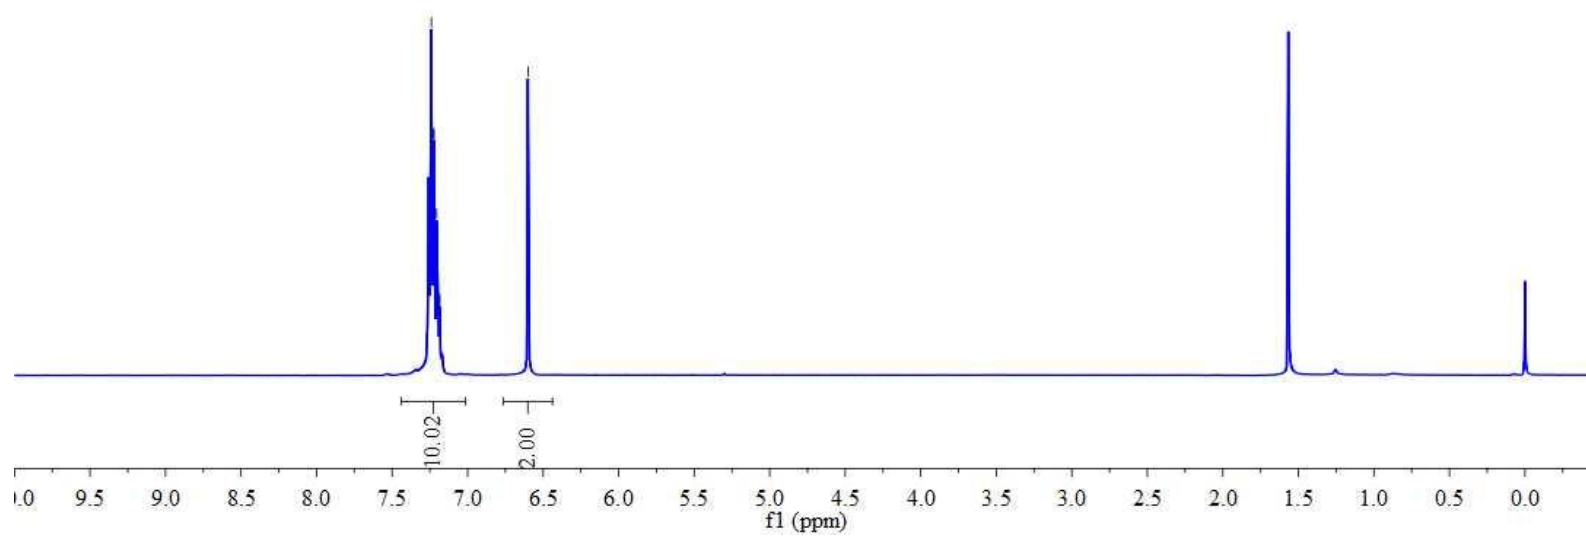

— 137.323  
130.339  
128.966  
128.303  
127.184

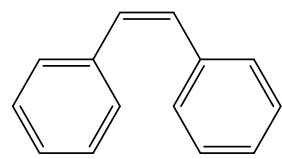

**2a**

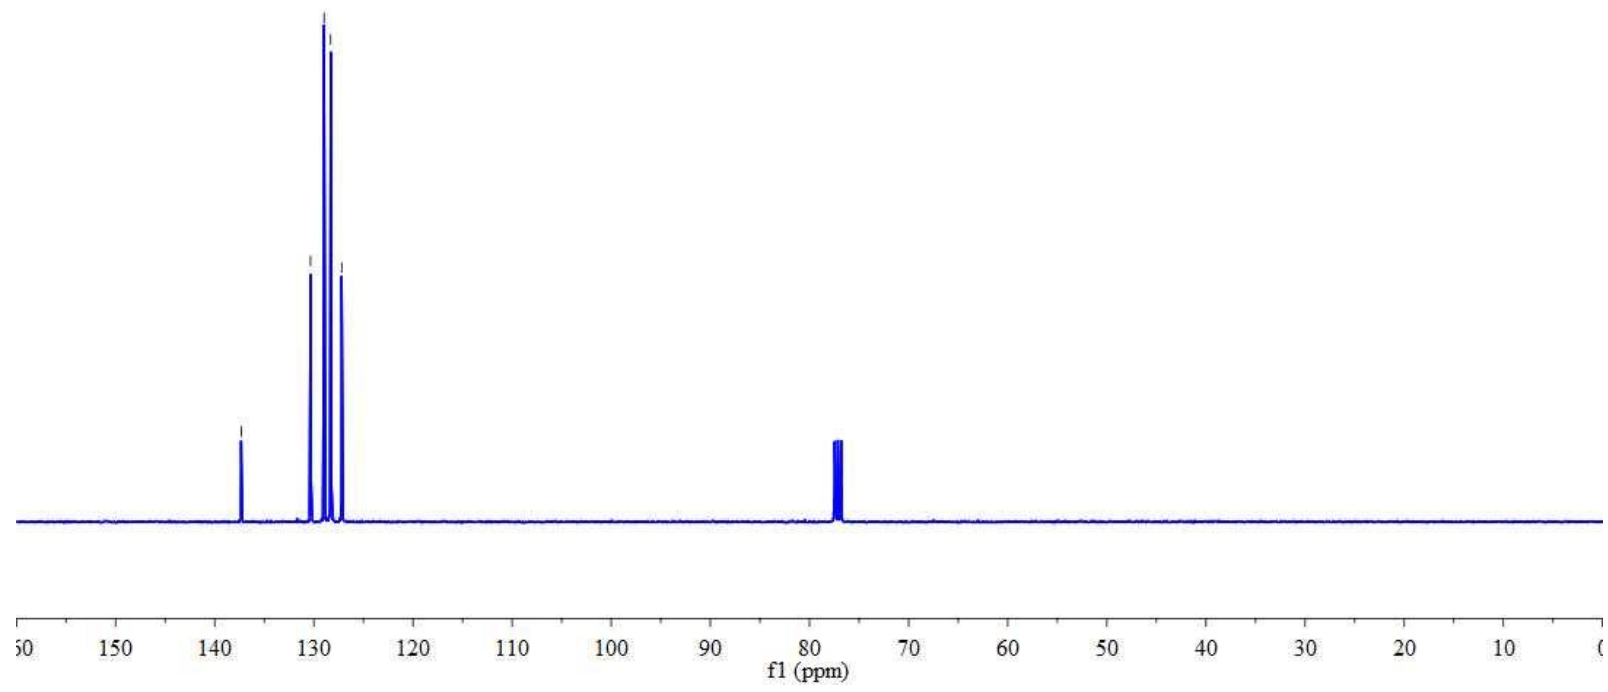

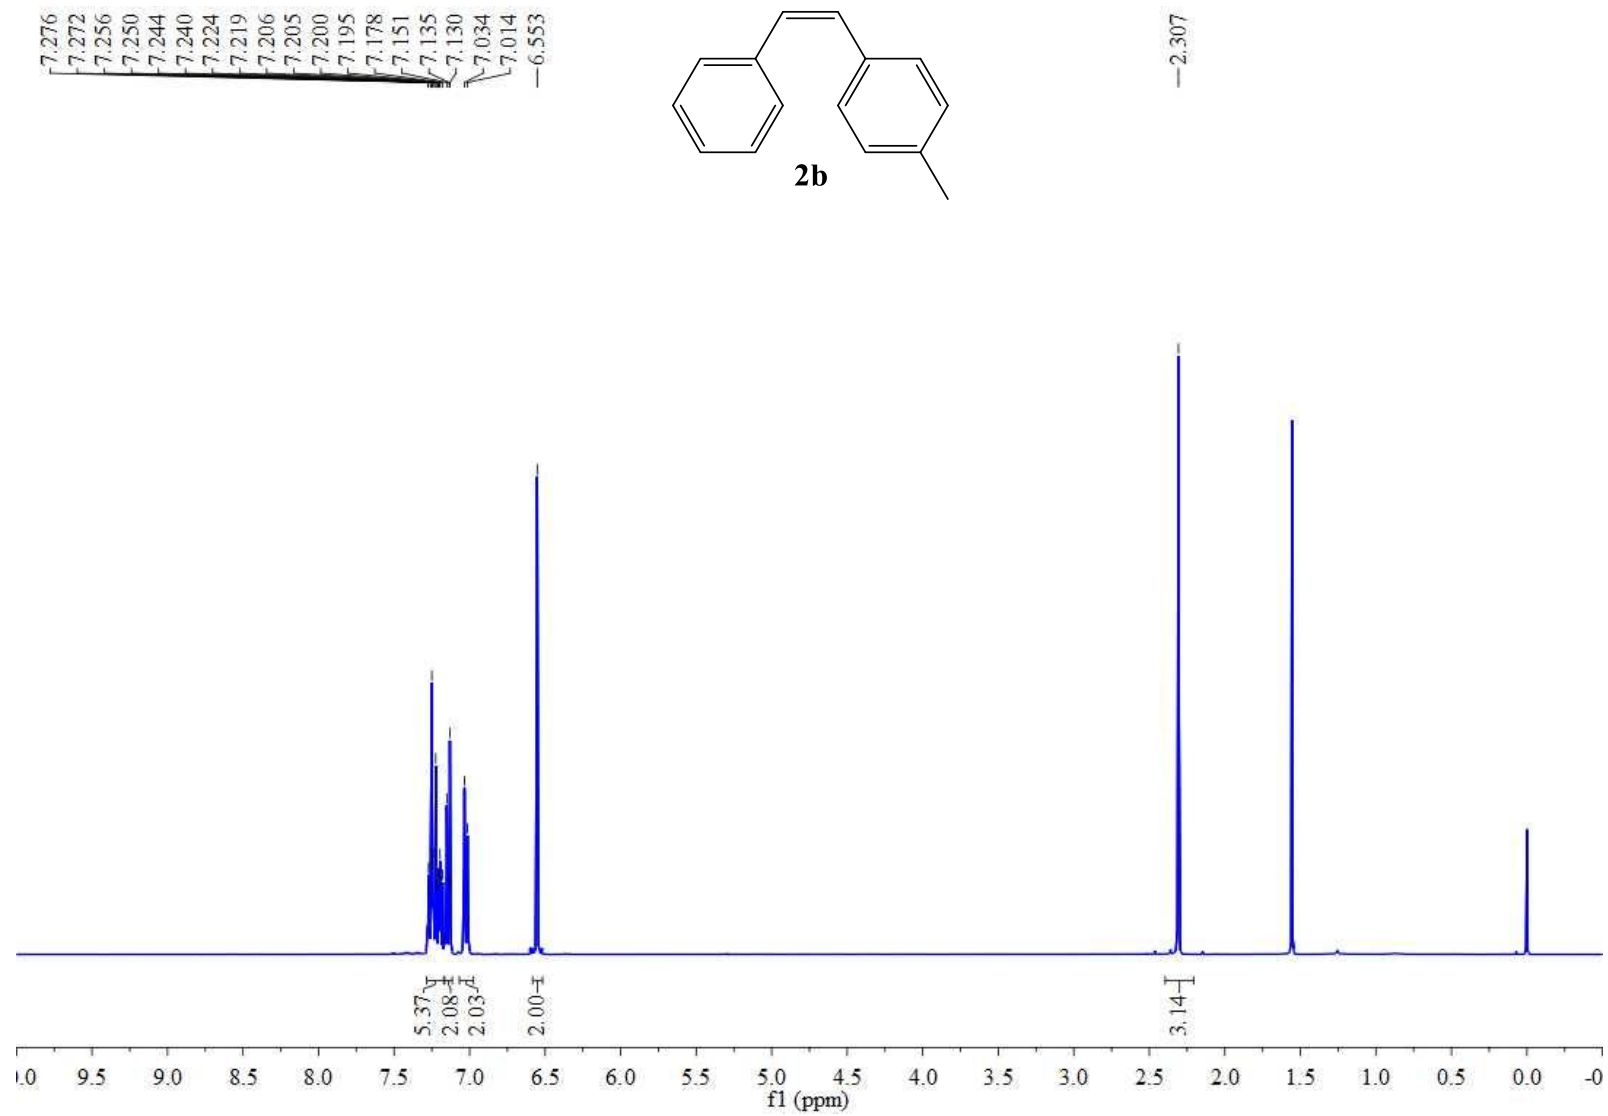

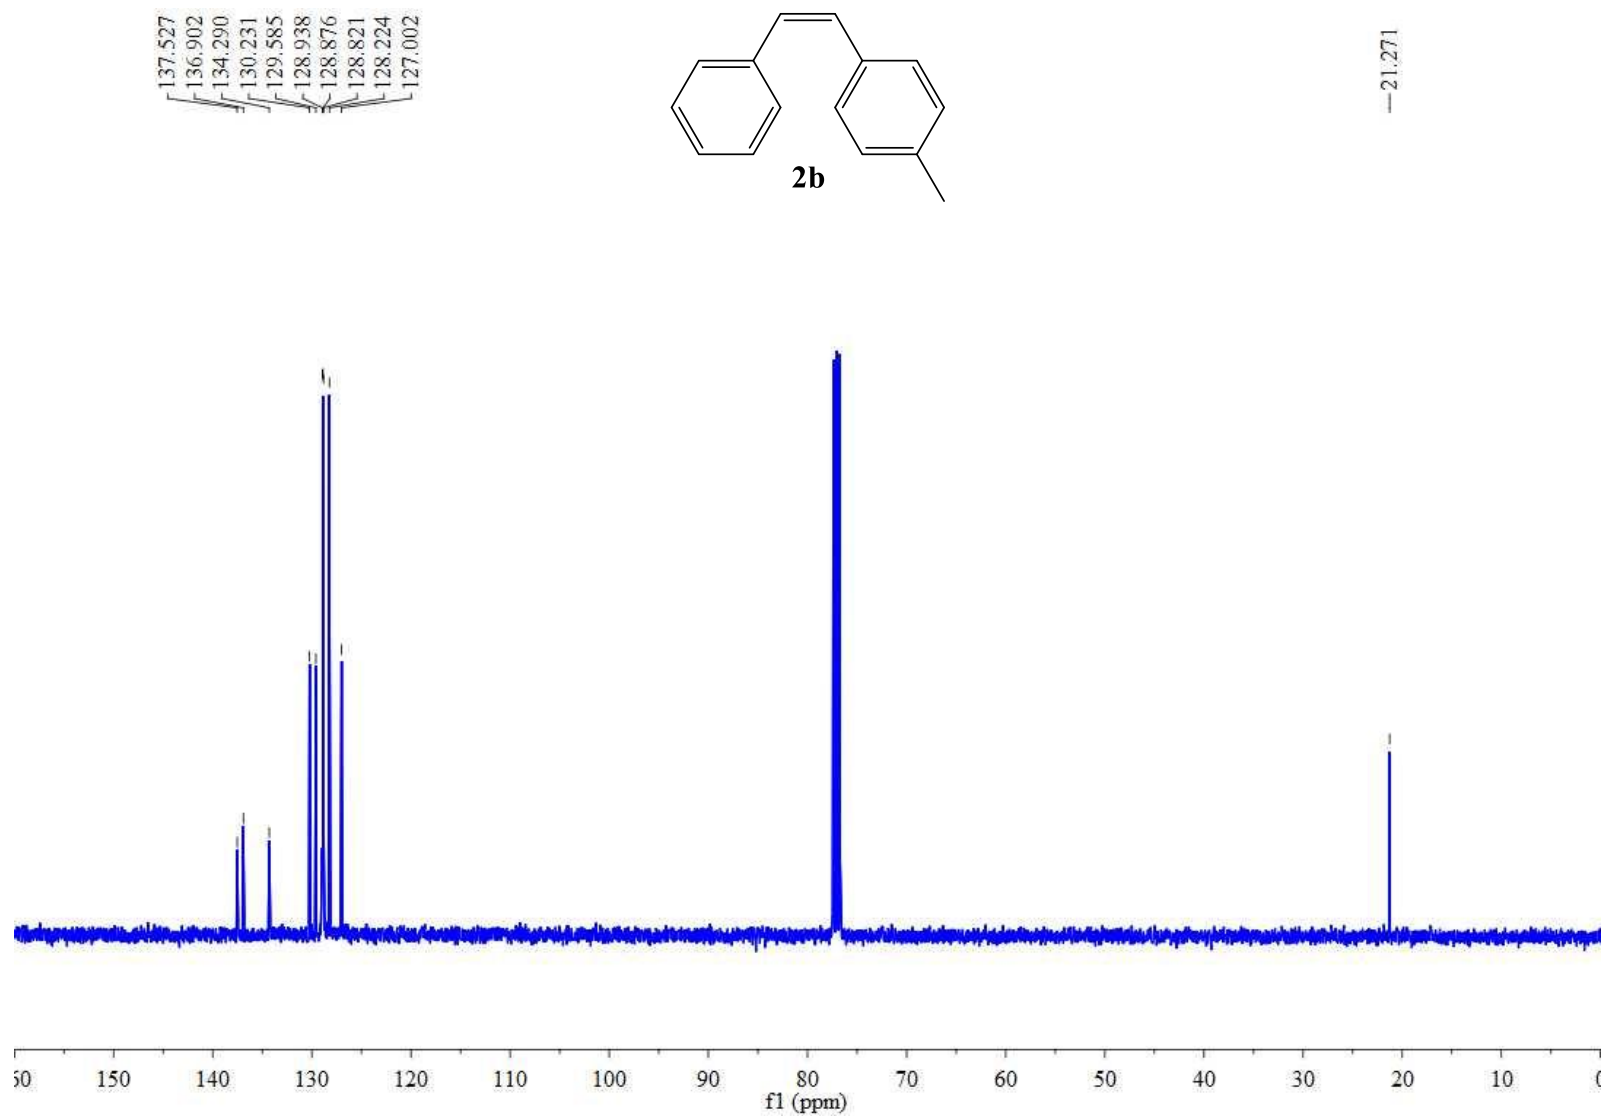

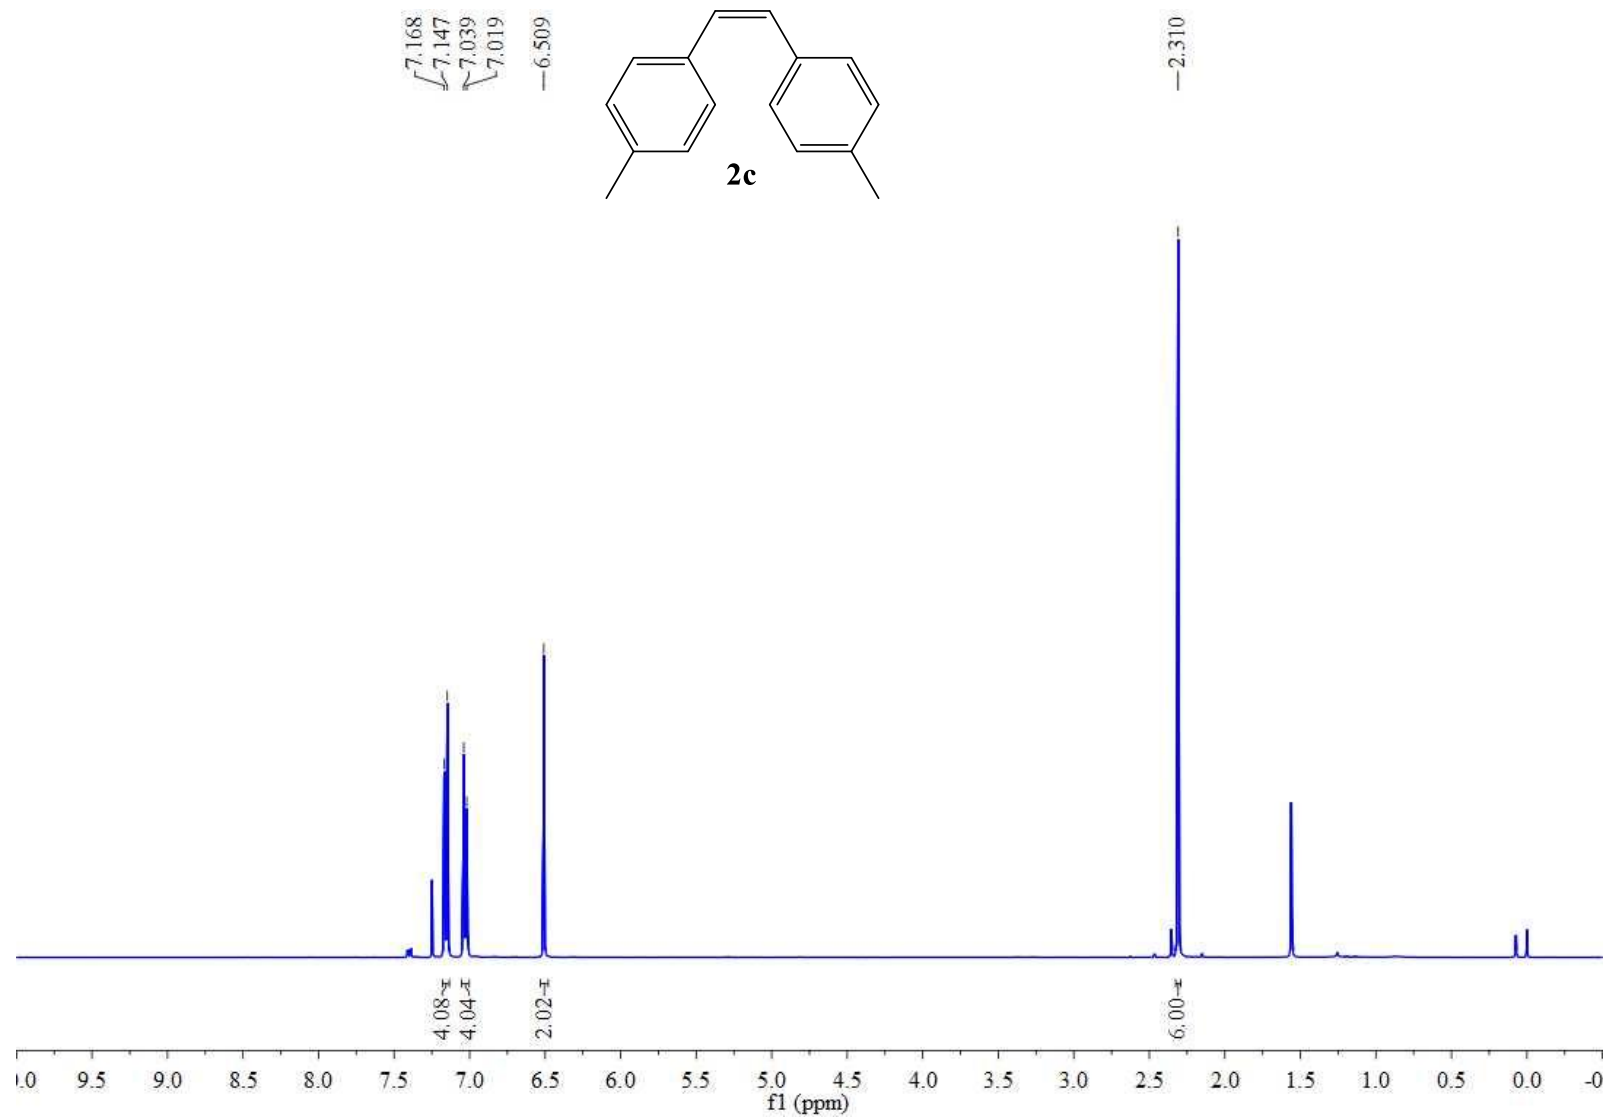

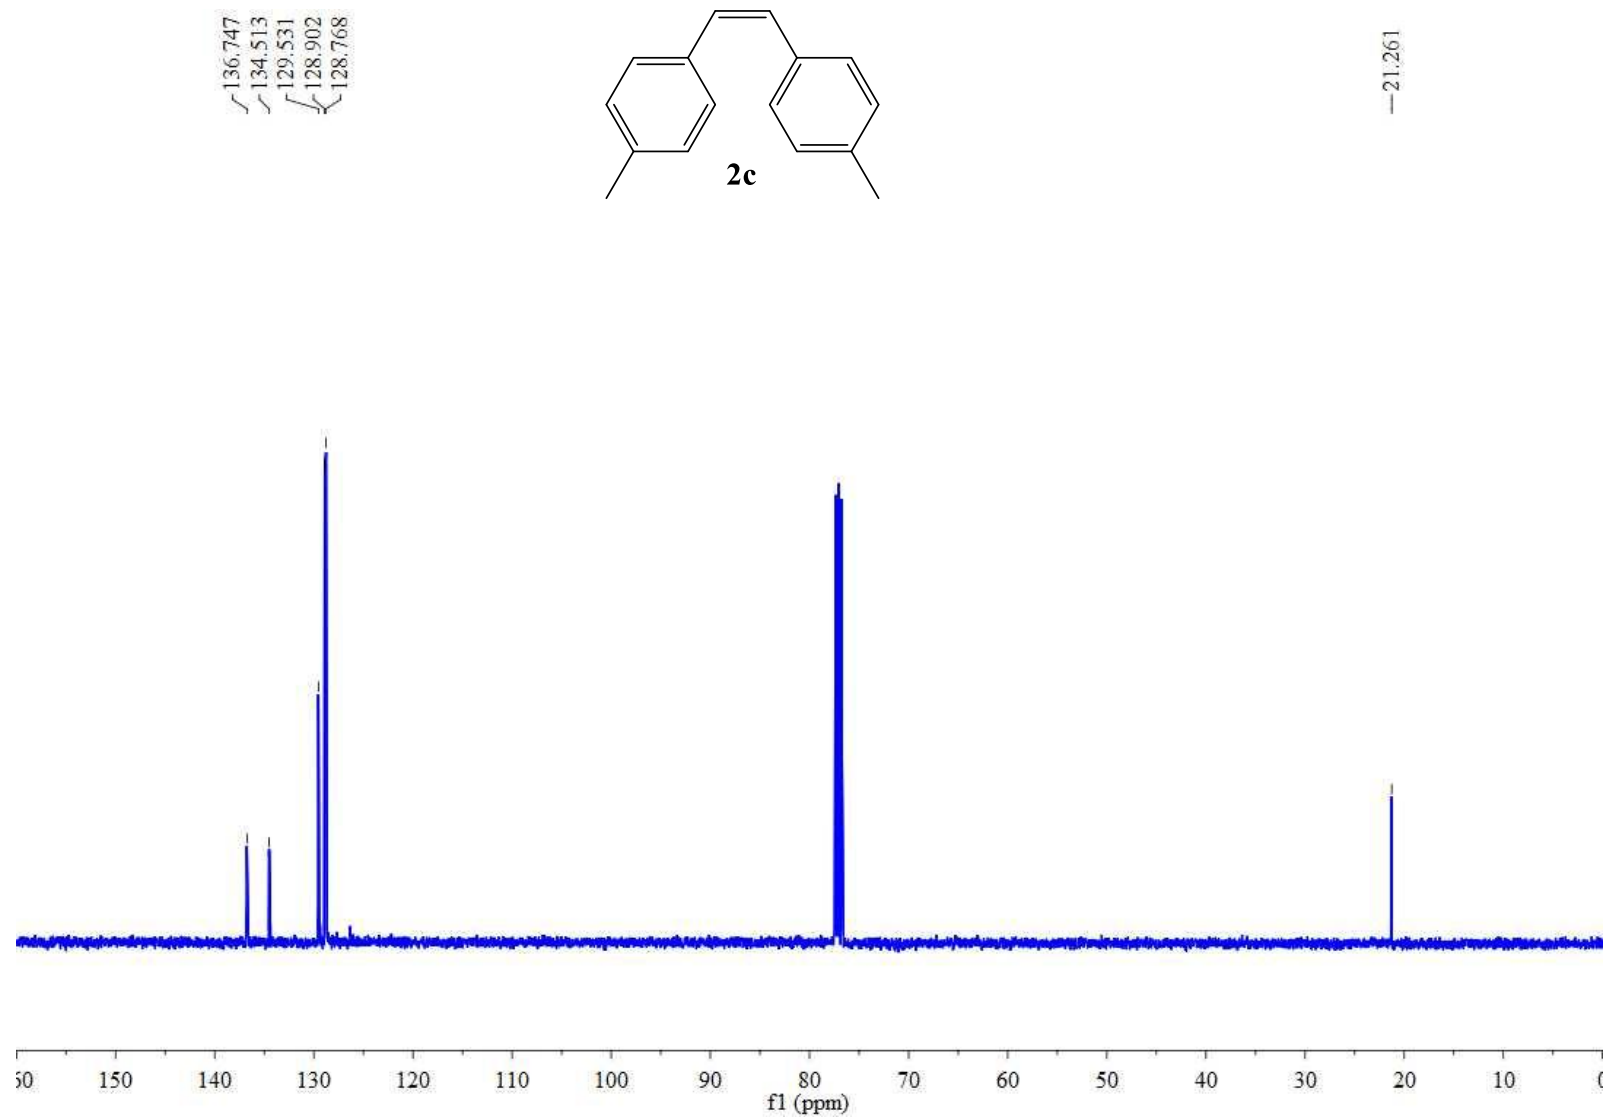

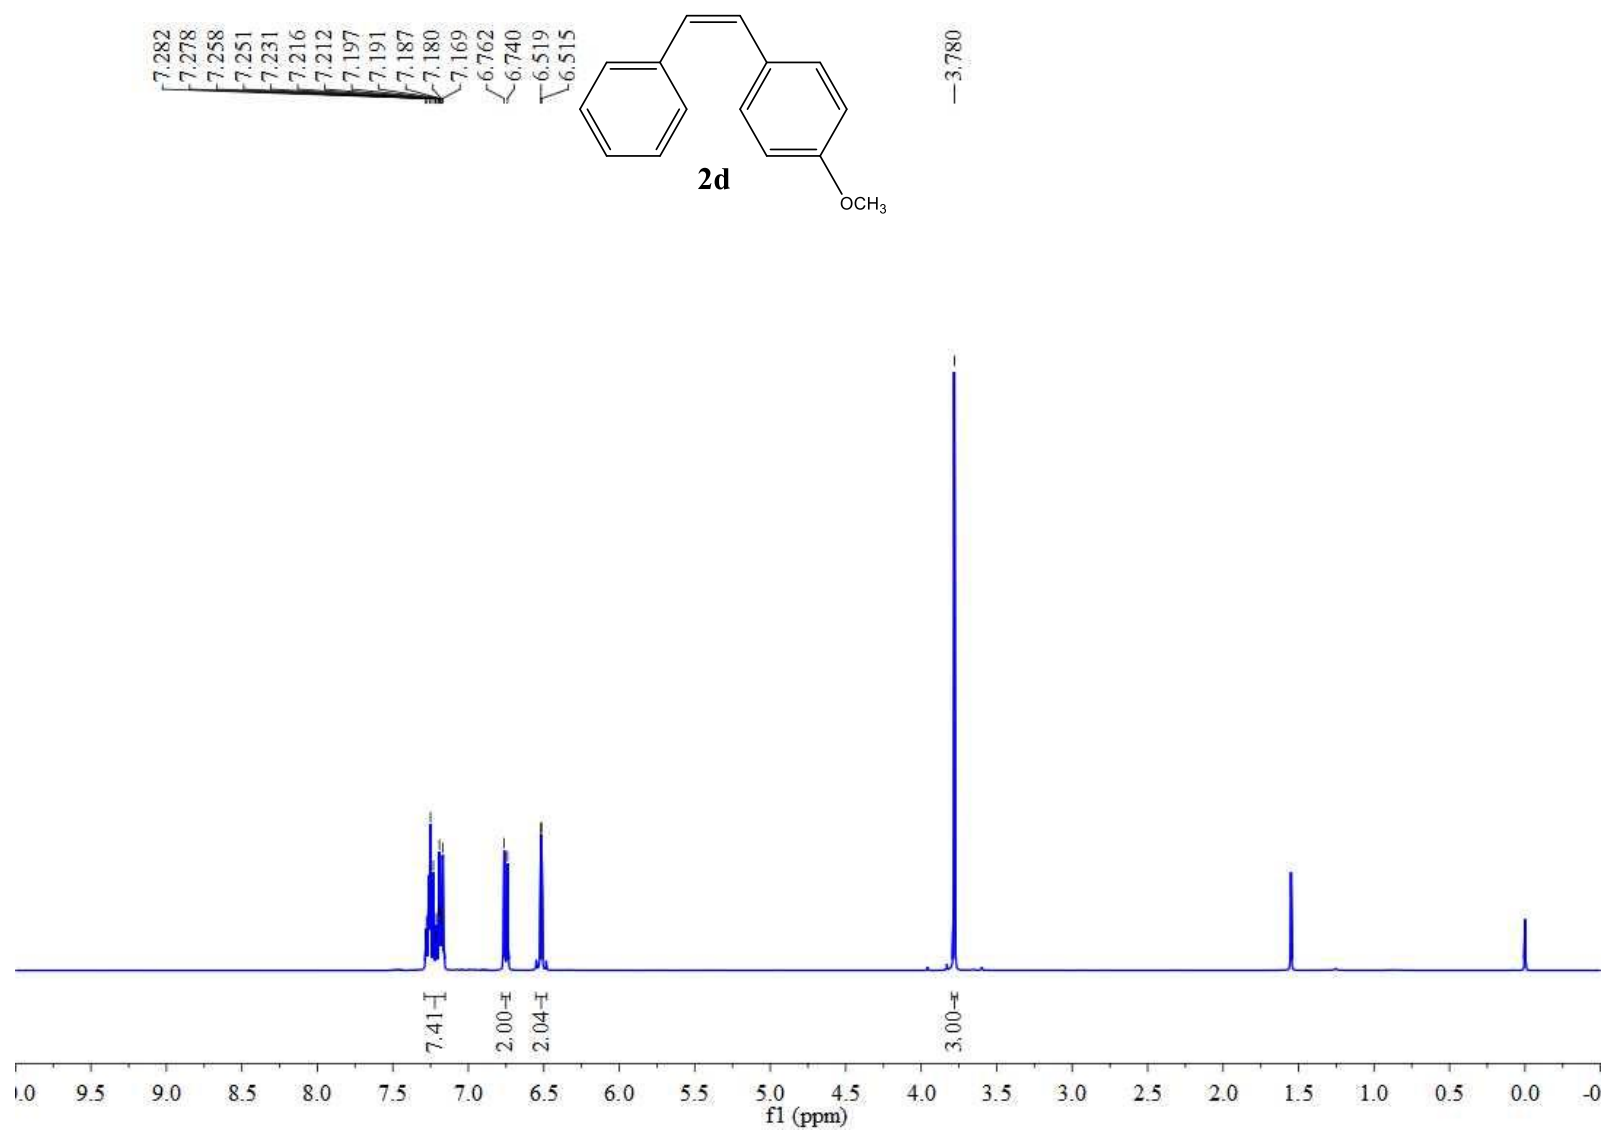

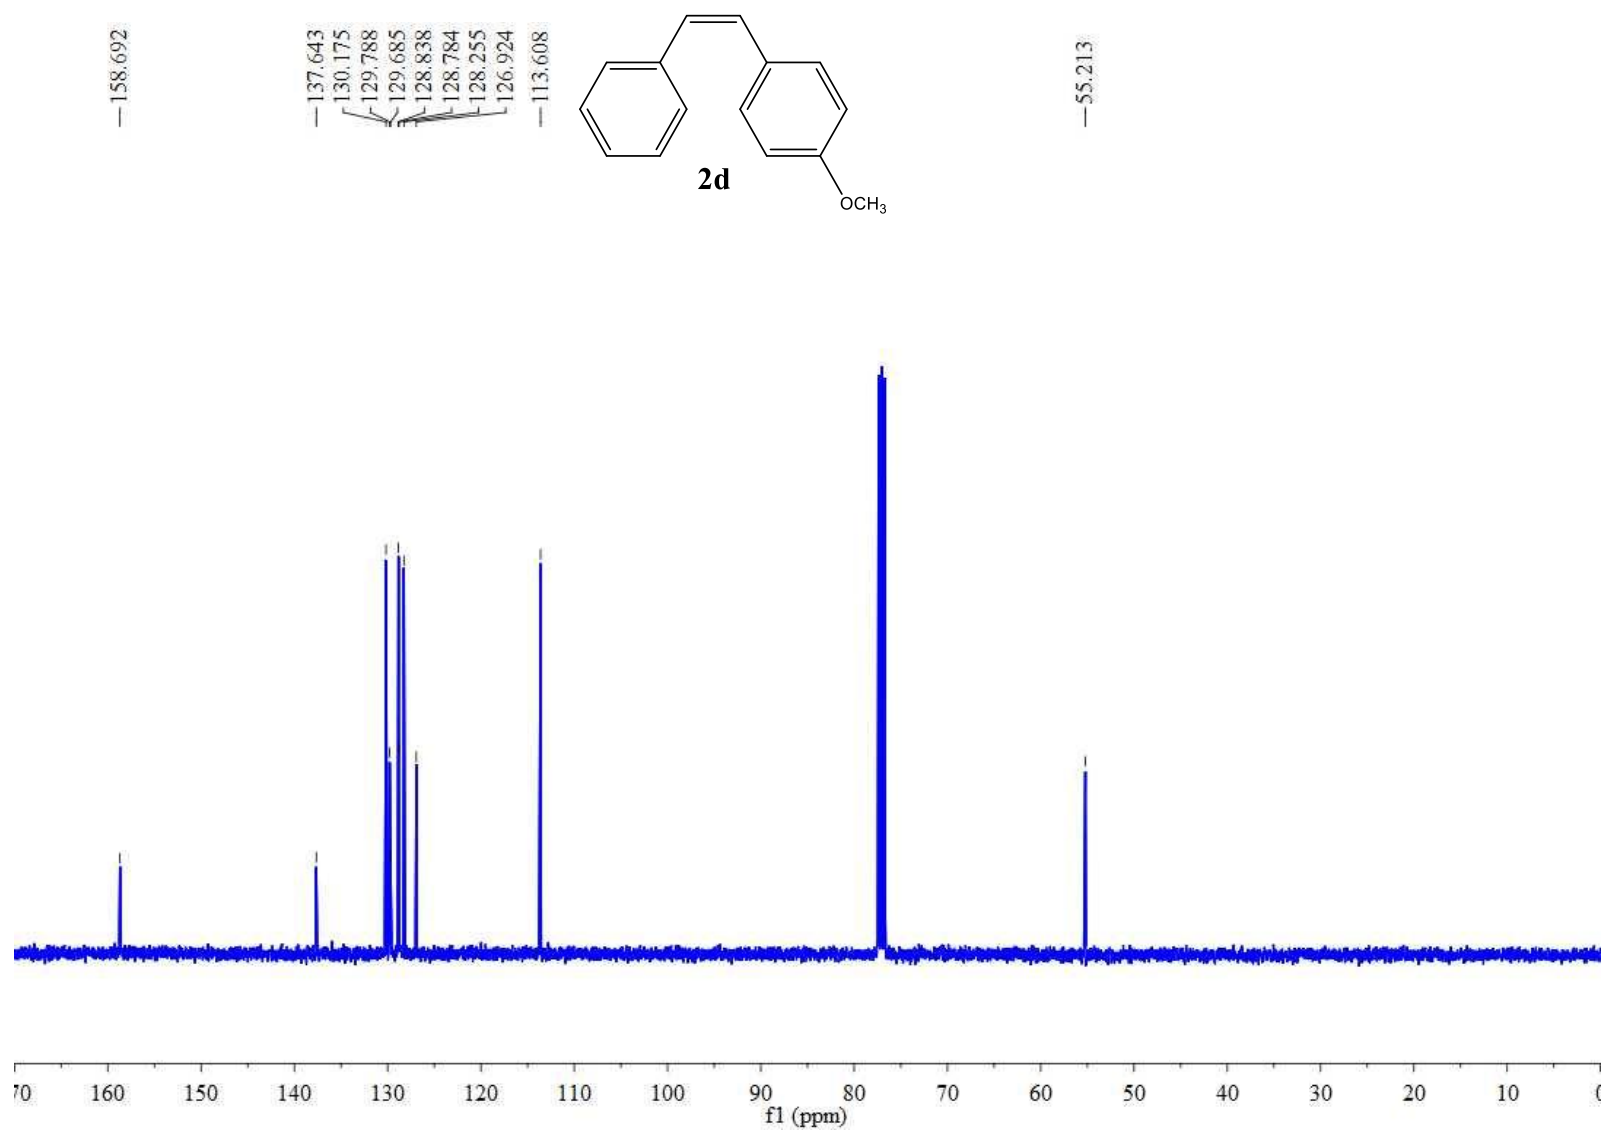

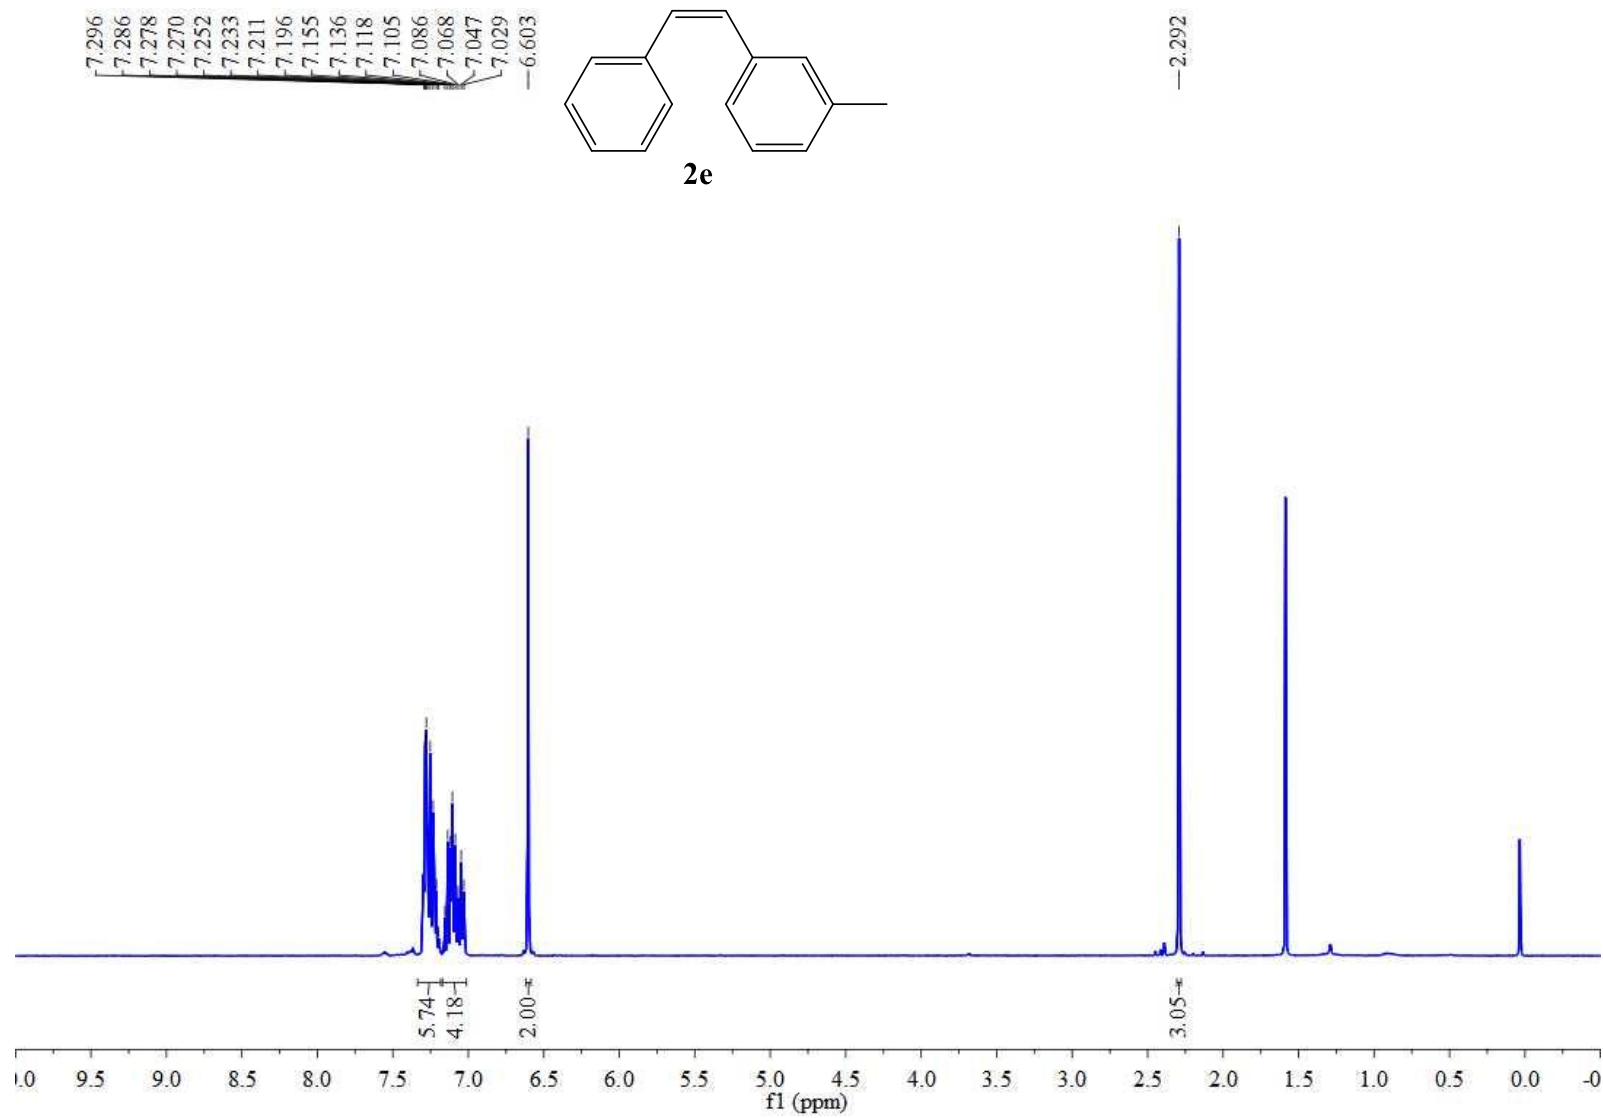

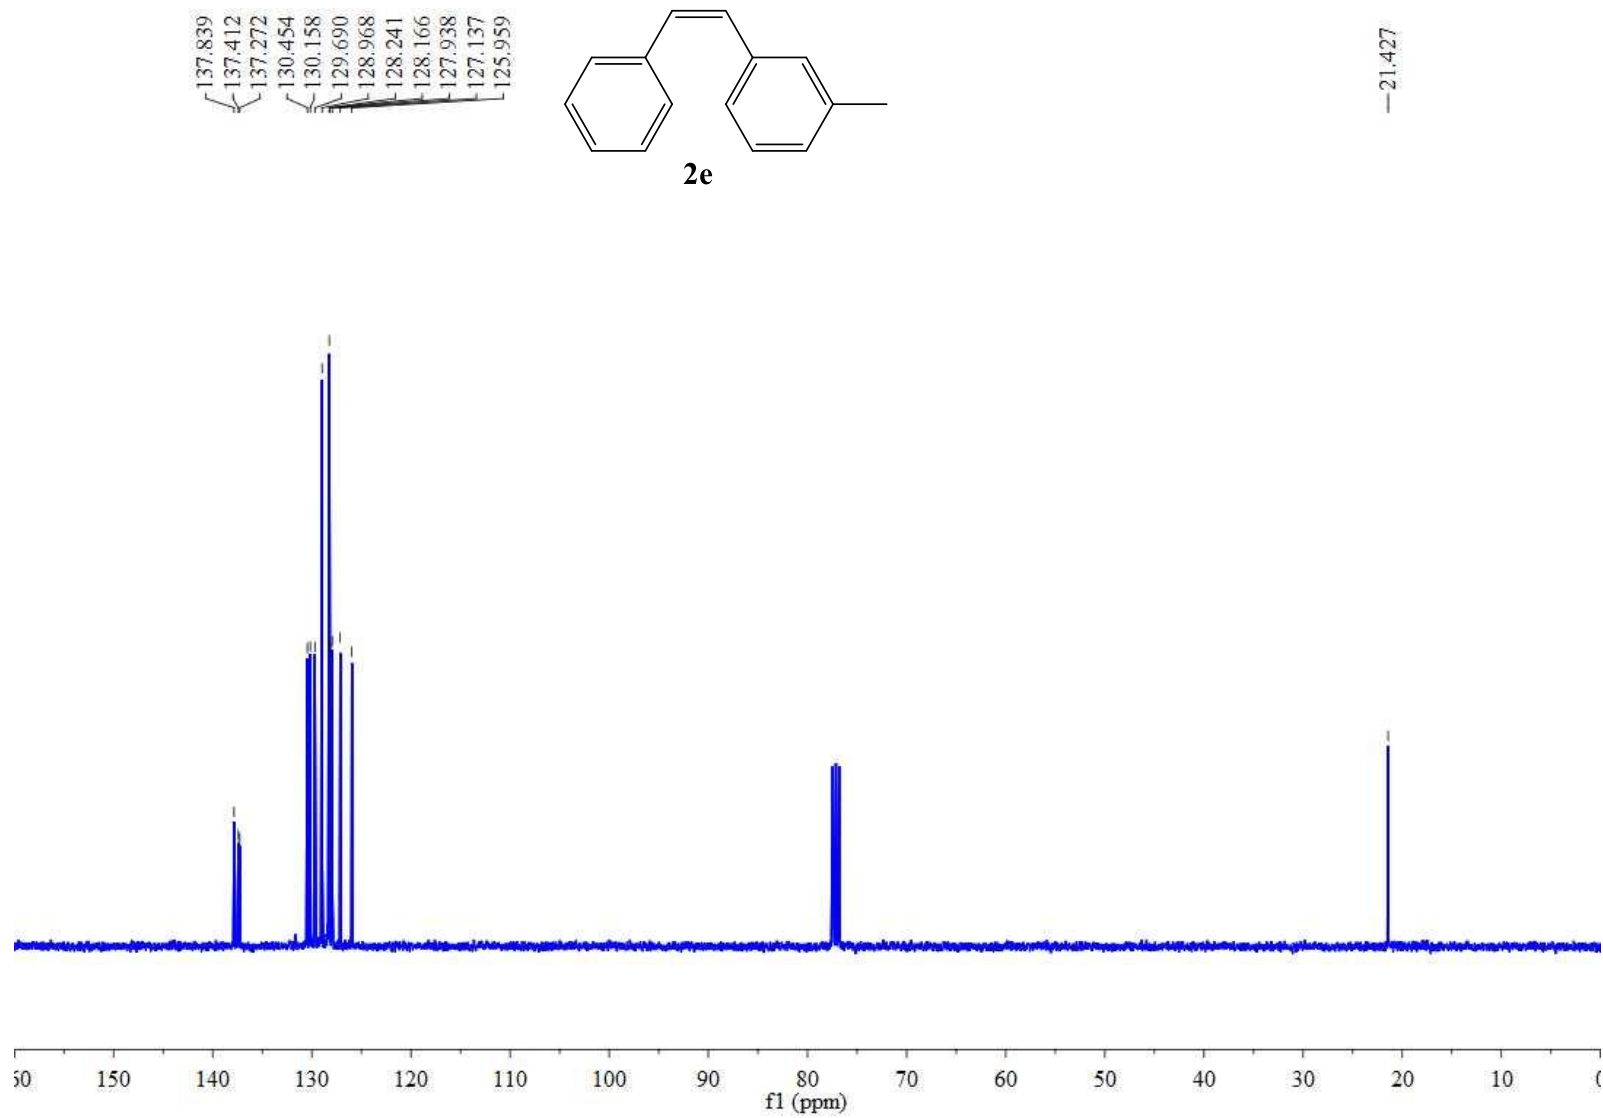

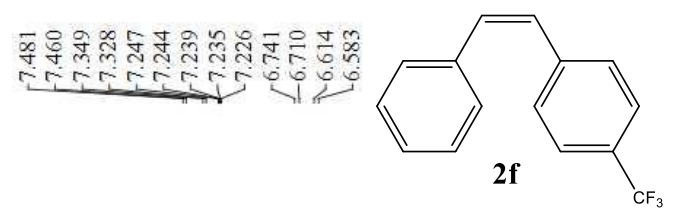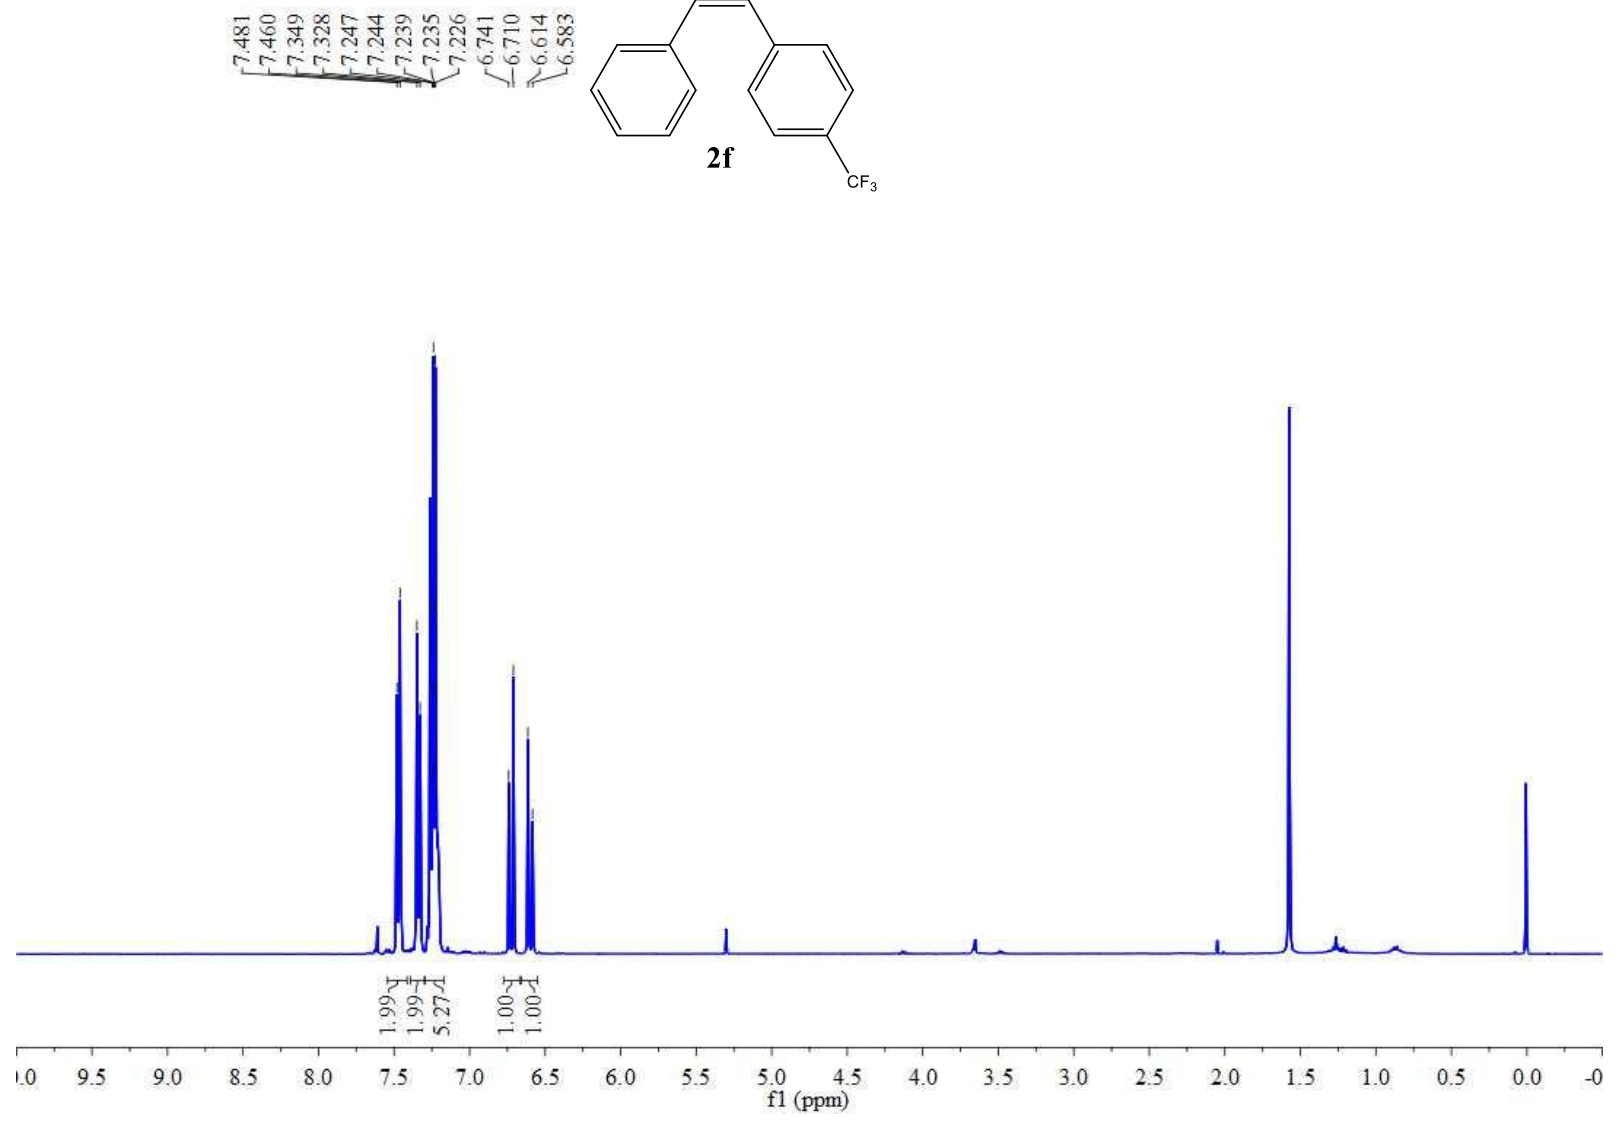

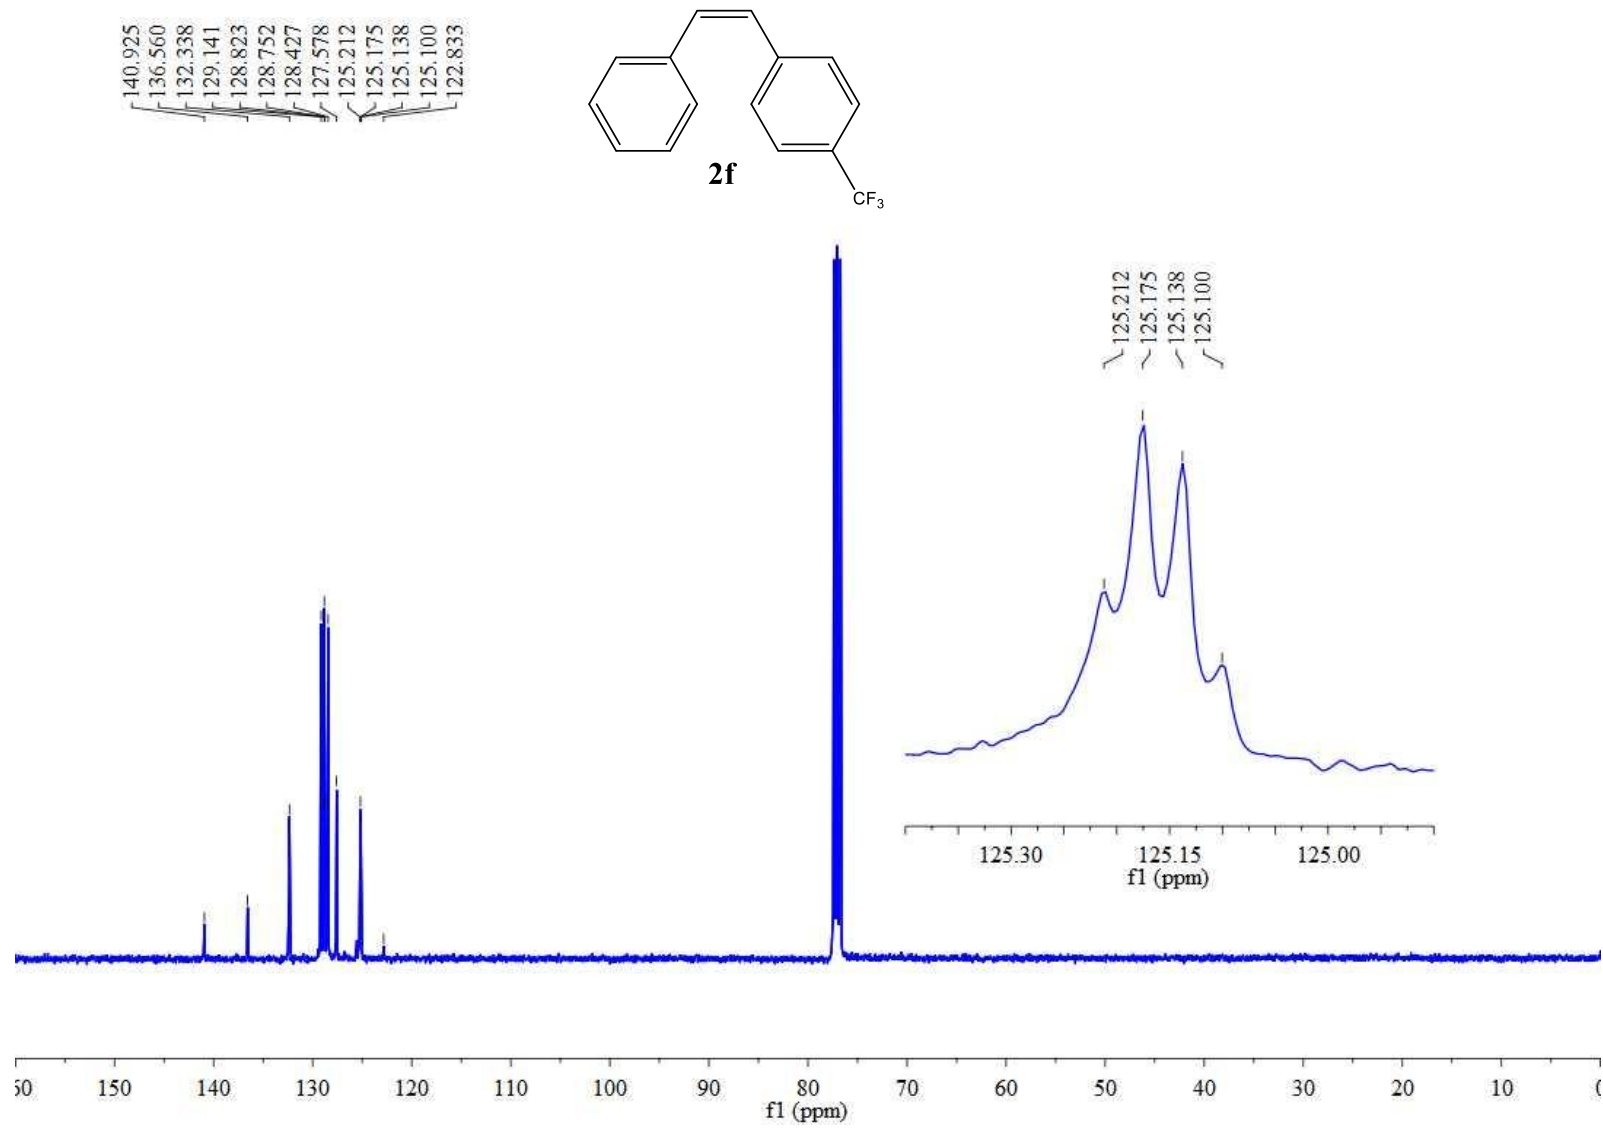

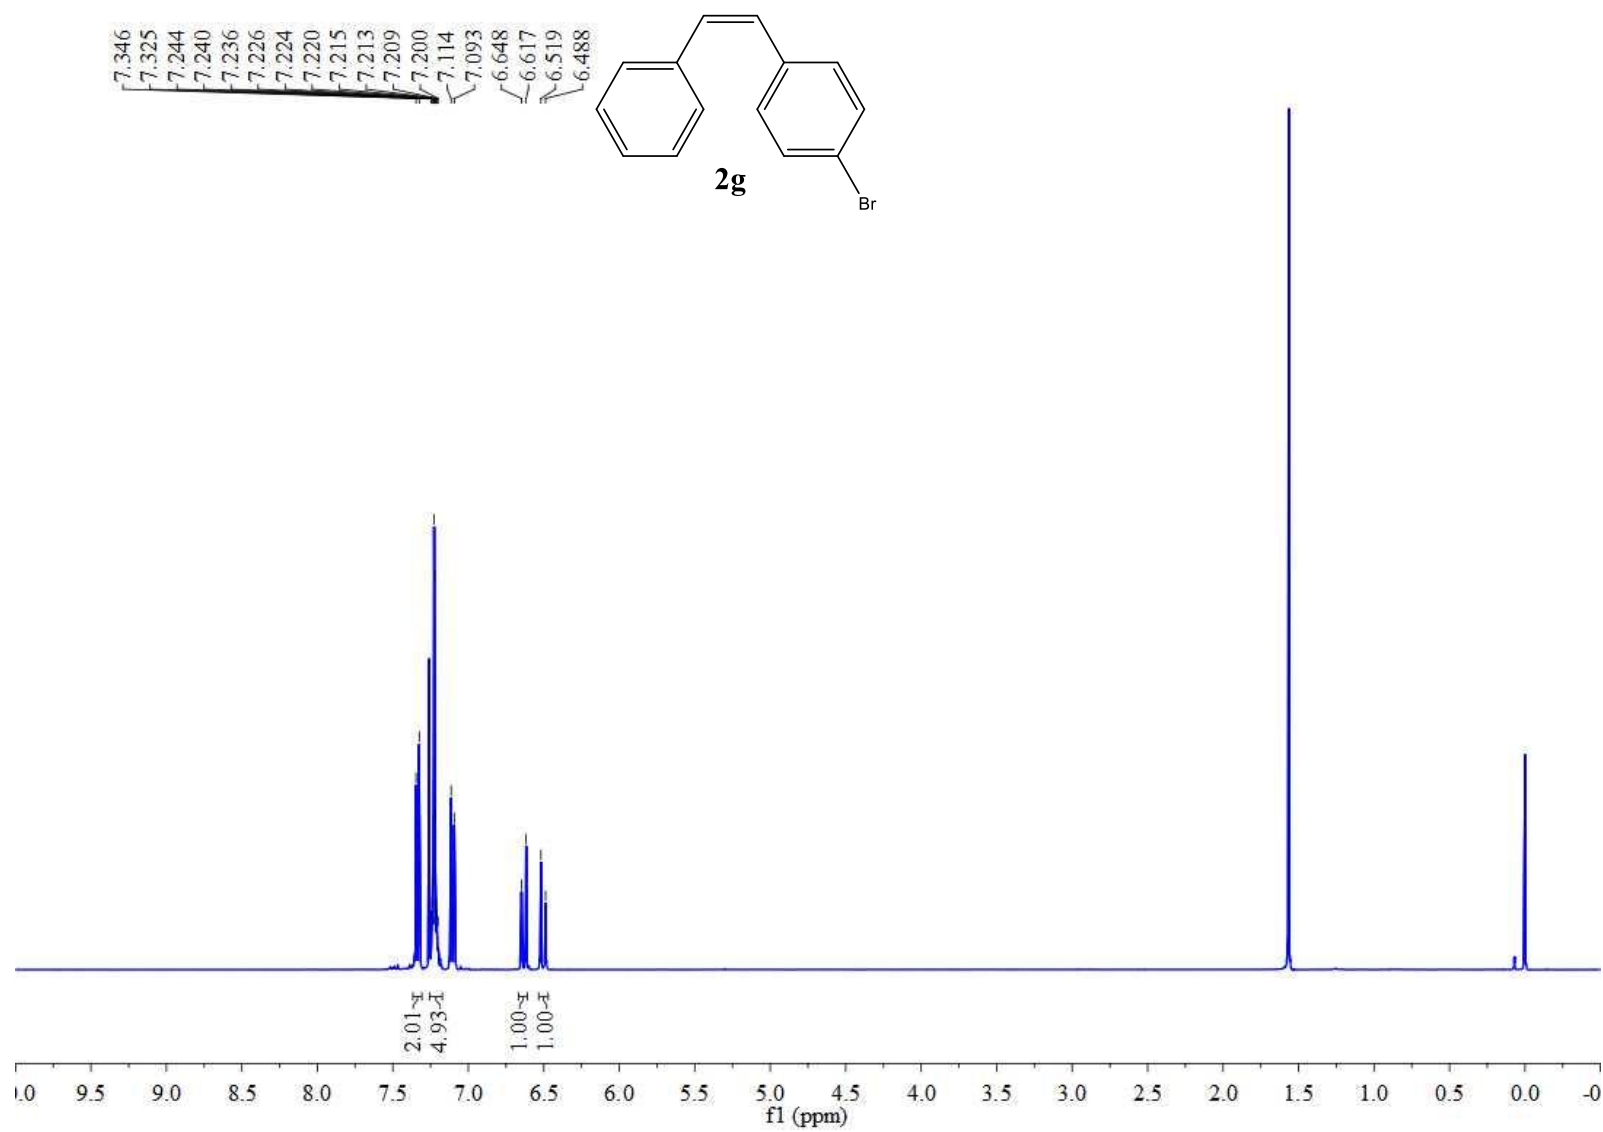

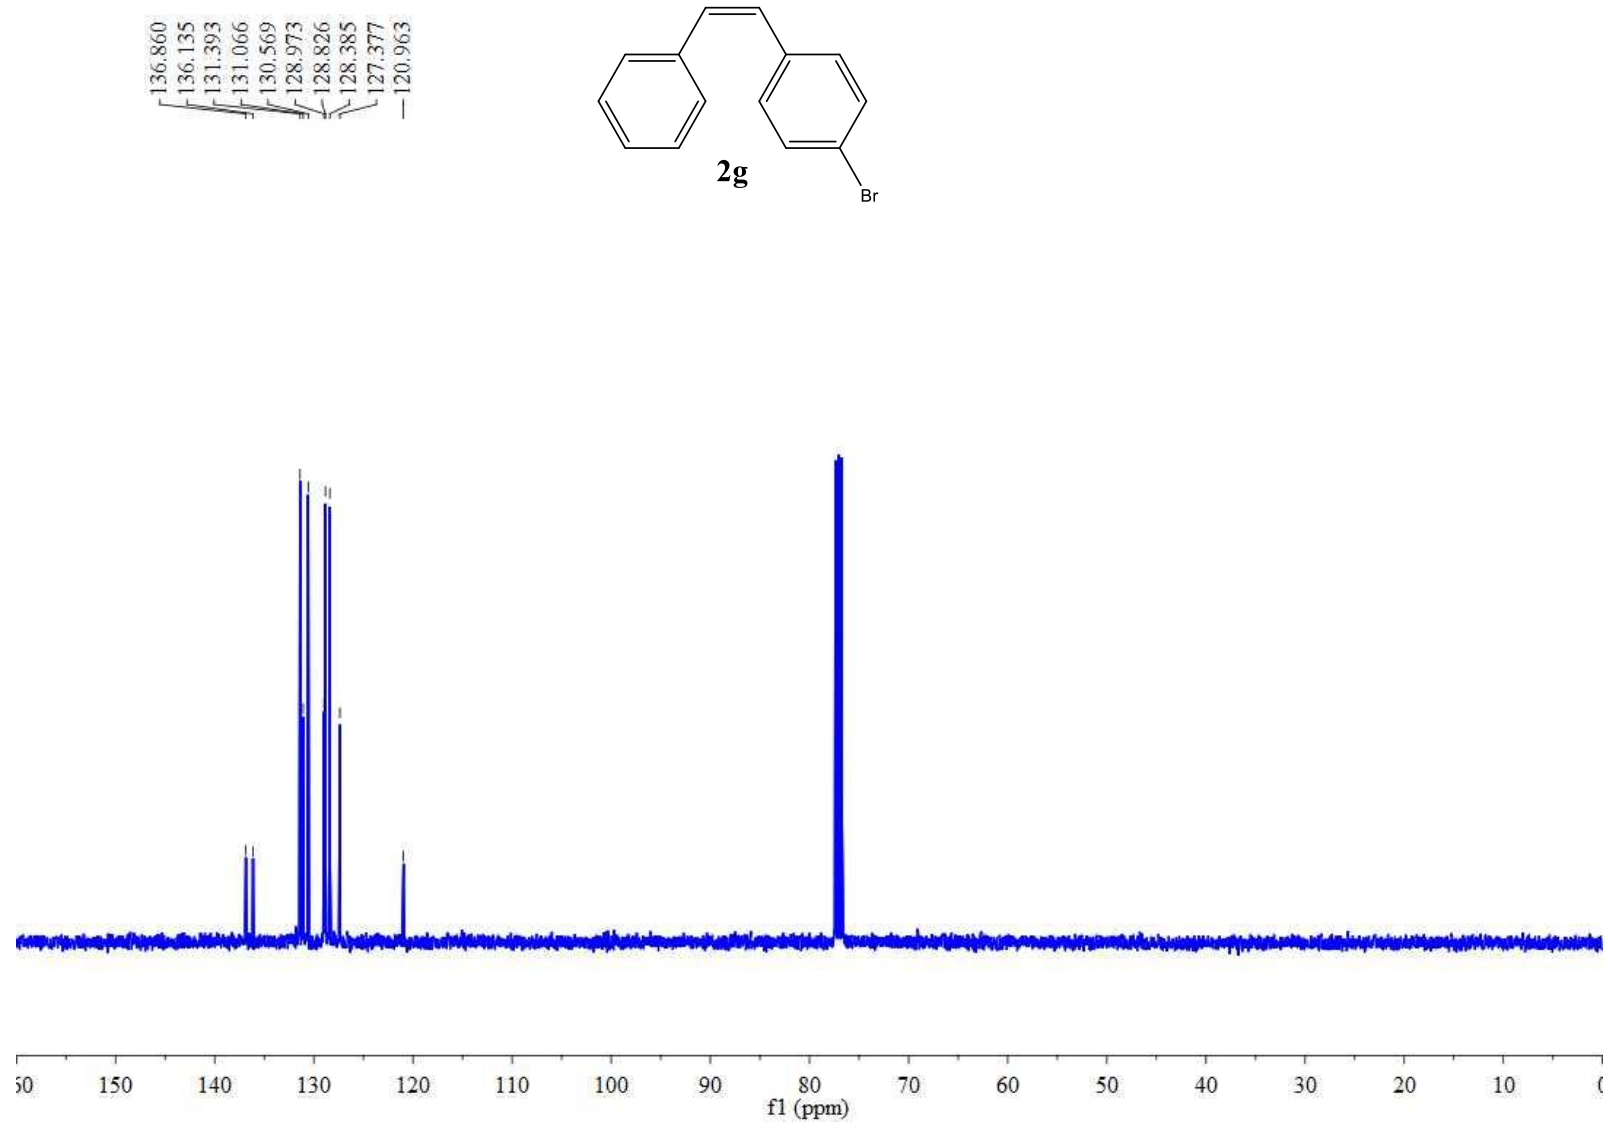

7.288  
7.271  
7.260  
7.239  
7.207  
7.184  
7.166  
7.146  
7.127  
6.696  
6.665  
6.568  
6.537

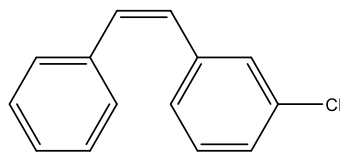

**2h**

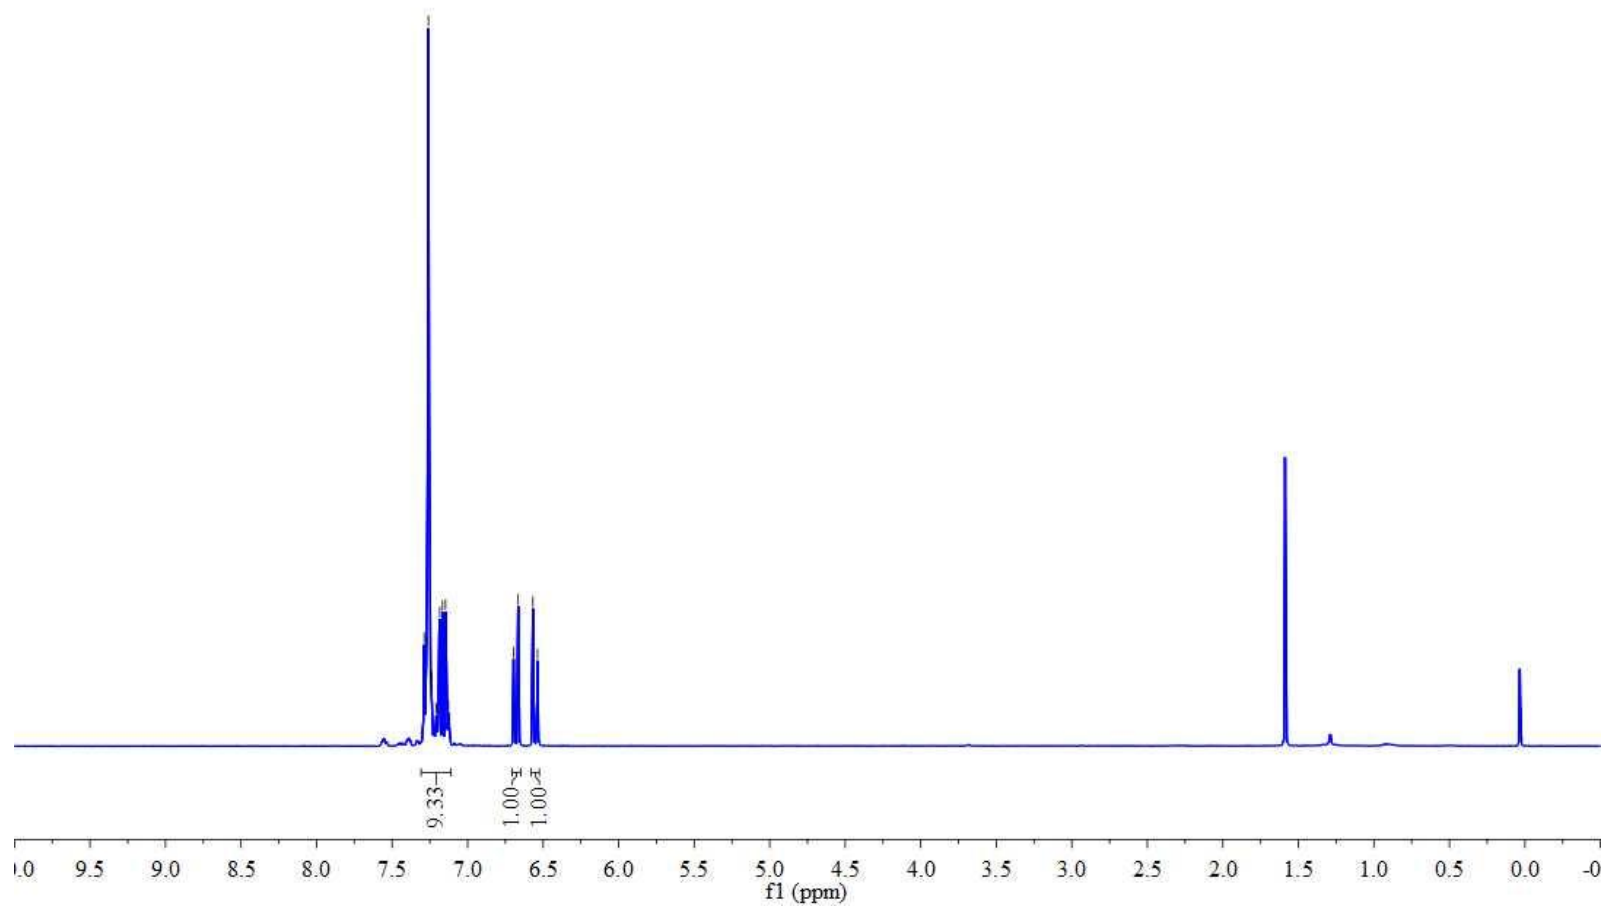

139.171  
136.679  
134.135  
131.638  
129.499  
128.909  
128.889  
128.784  
128.397  
127.520  
127.202  
127.070

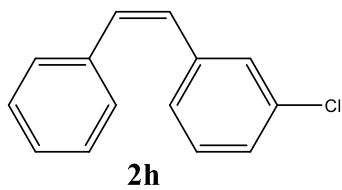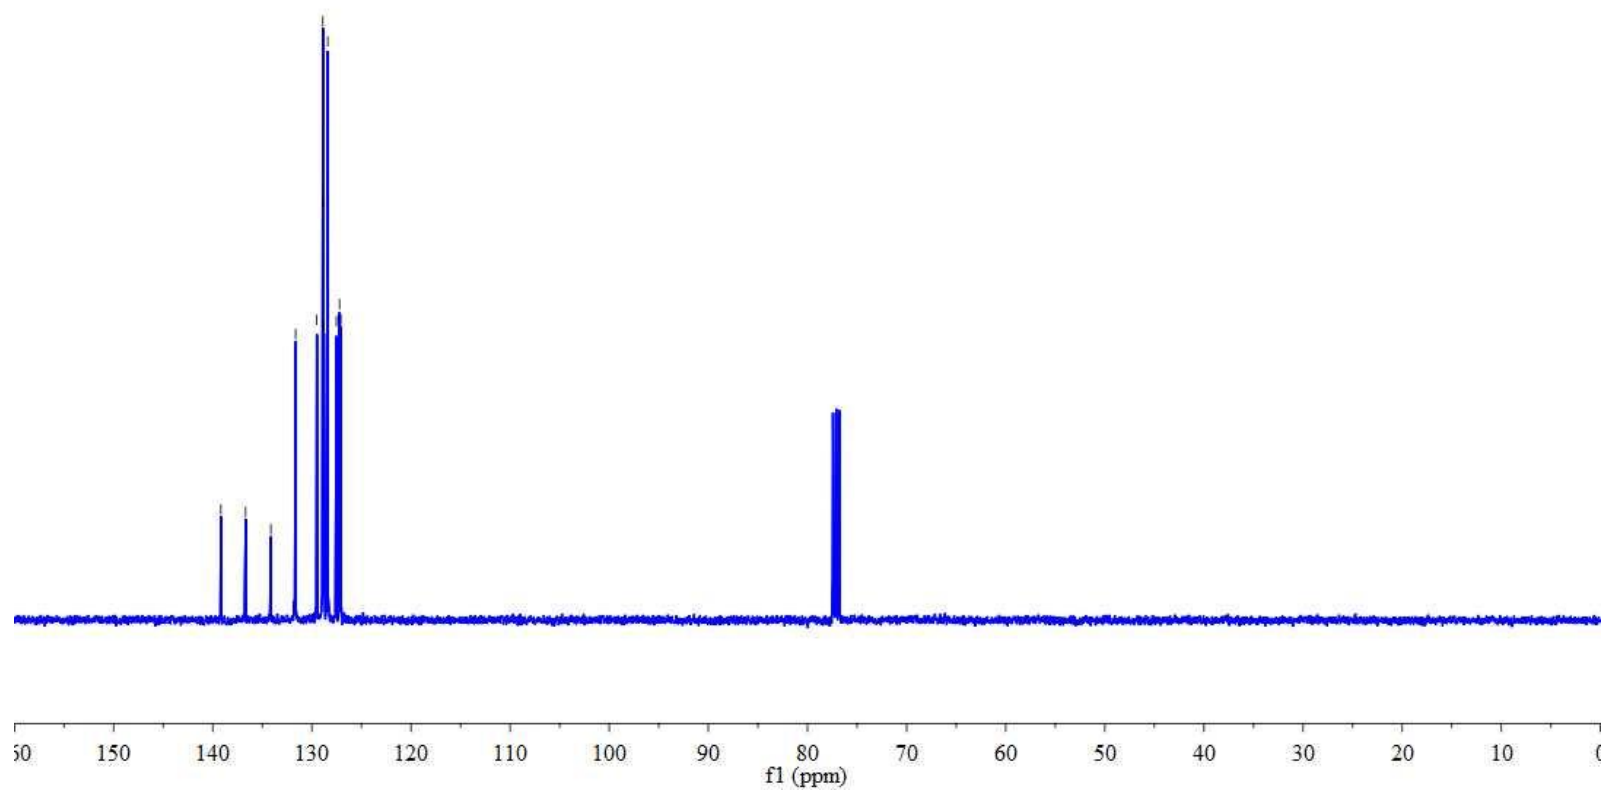

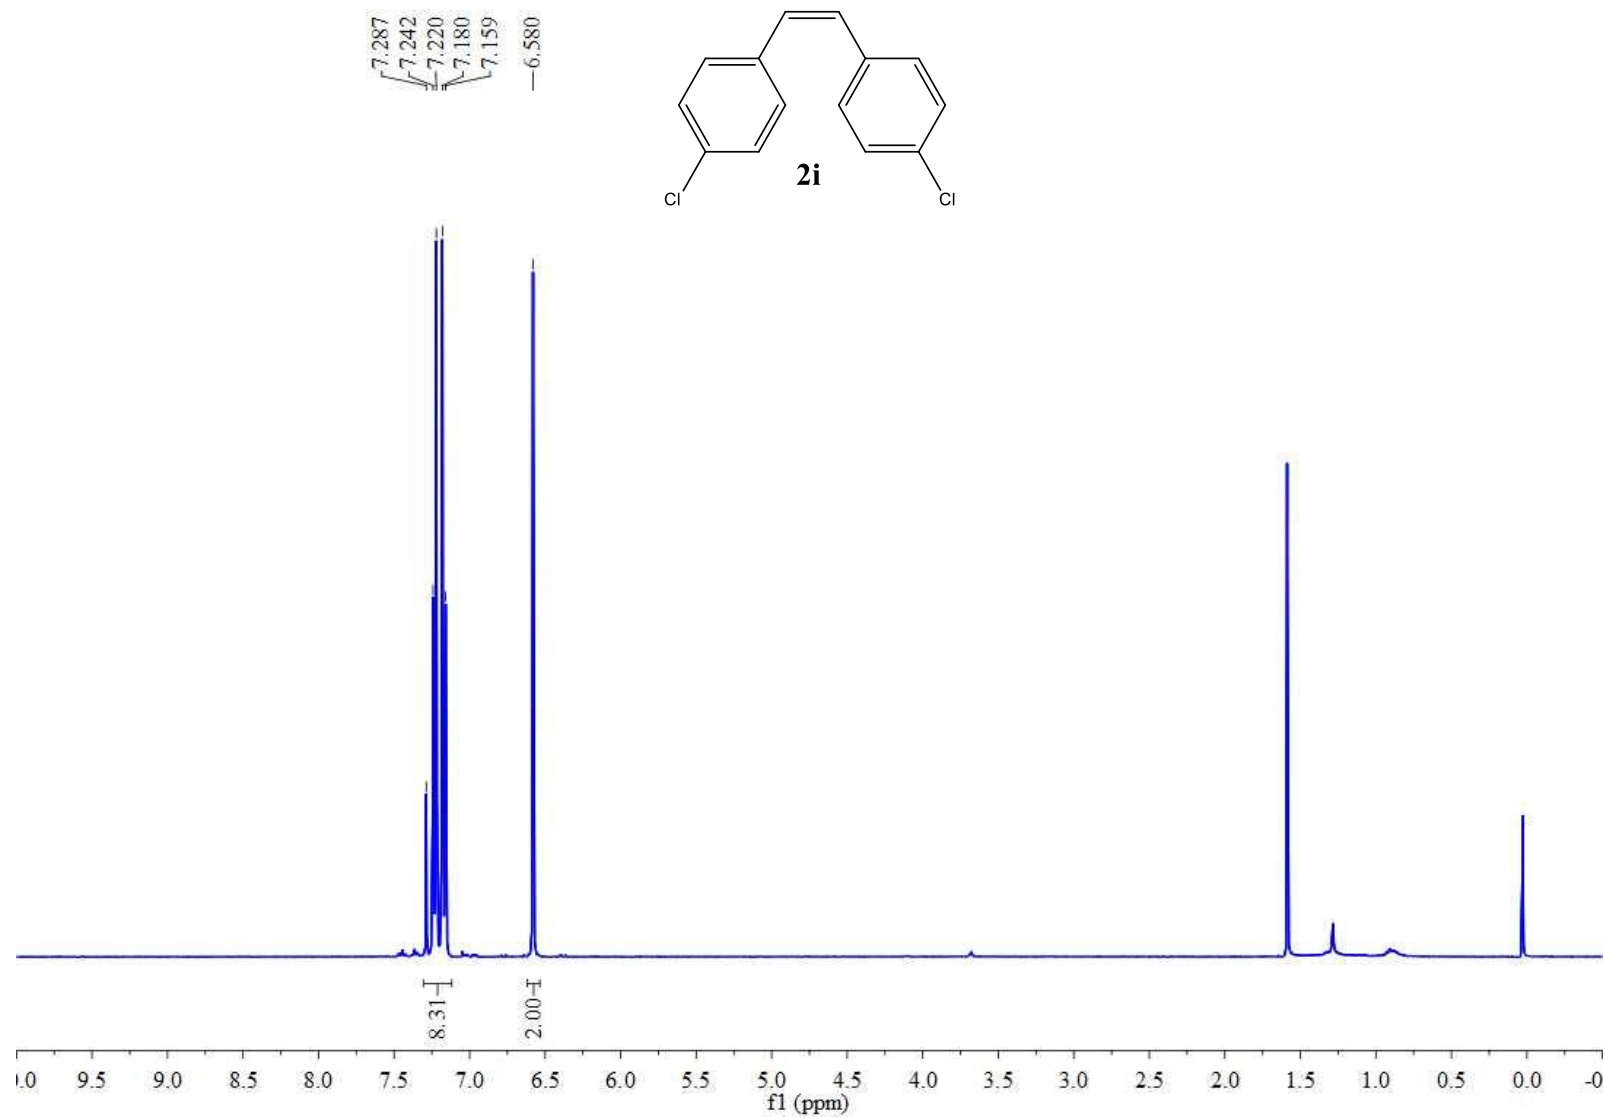

135.290  
133.062  
130.170  
129.641  
128.576

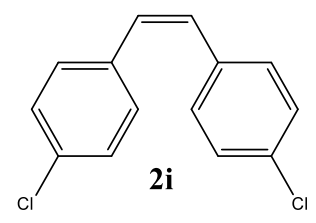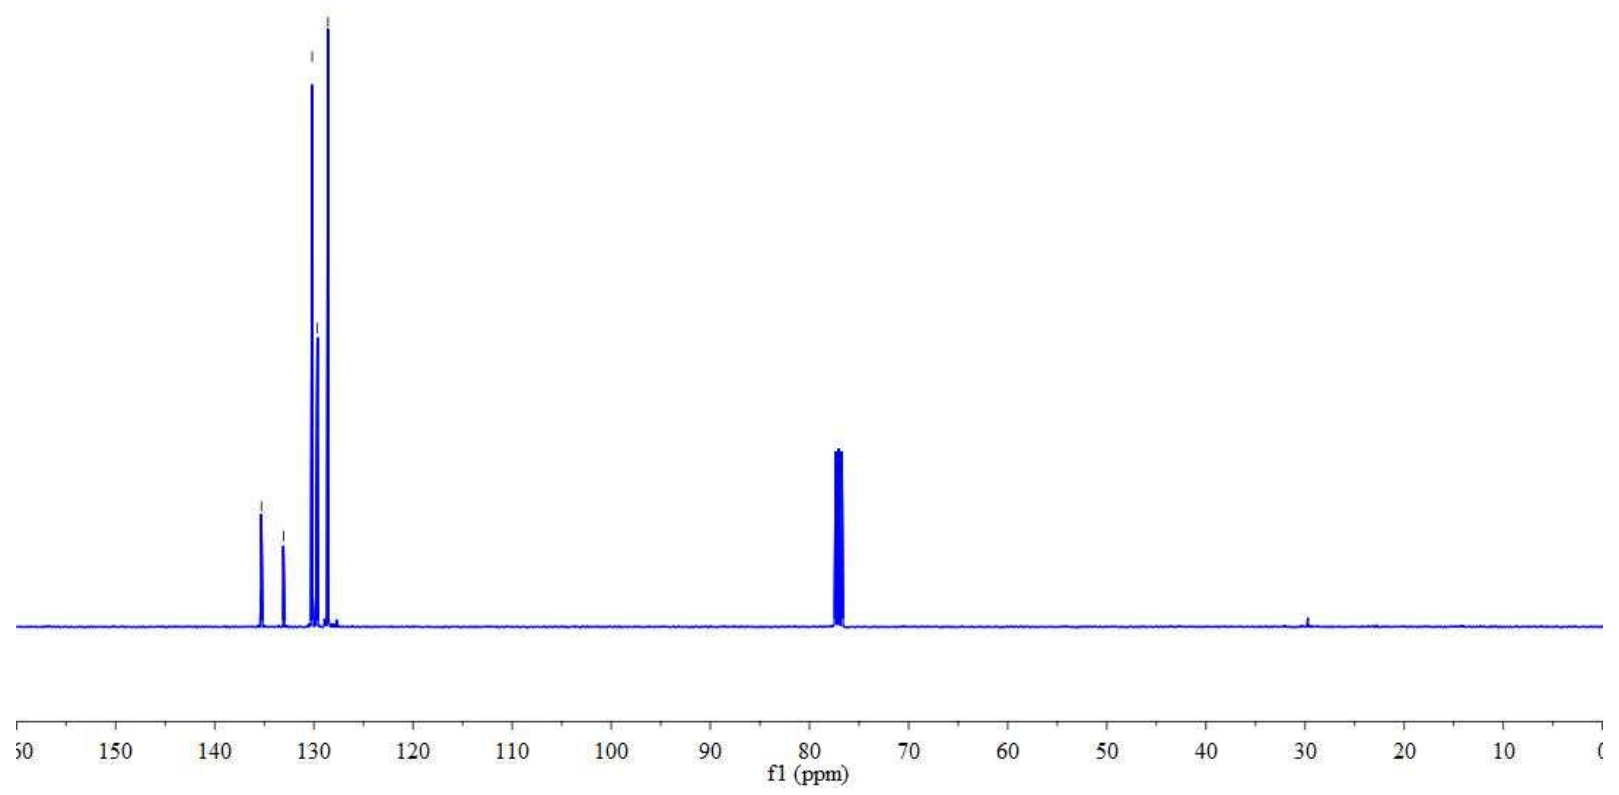

7.257  
7.244  
7.240  
7.236  
7.226  
7.219  
7.217  
7.209  
7.199  
7.183  
7.176  
7.170  
7.147  
6.640  
6.609  
6.541  
6.510

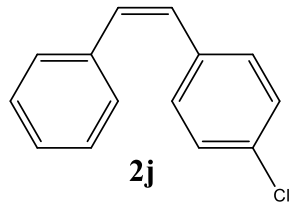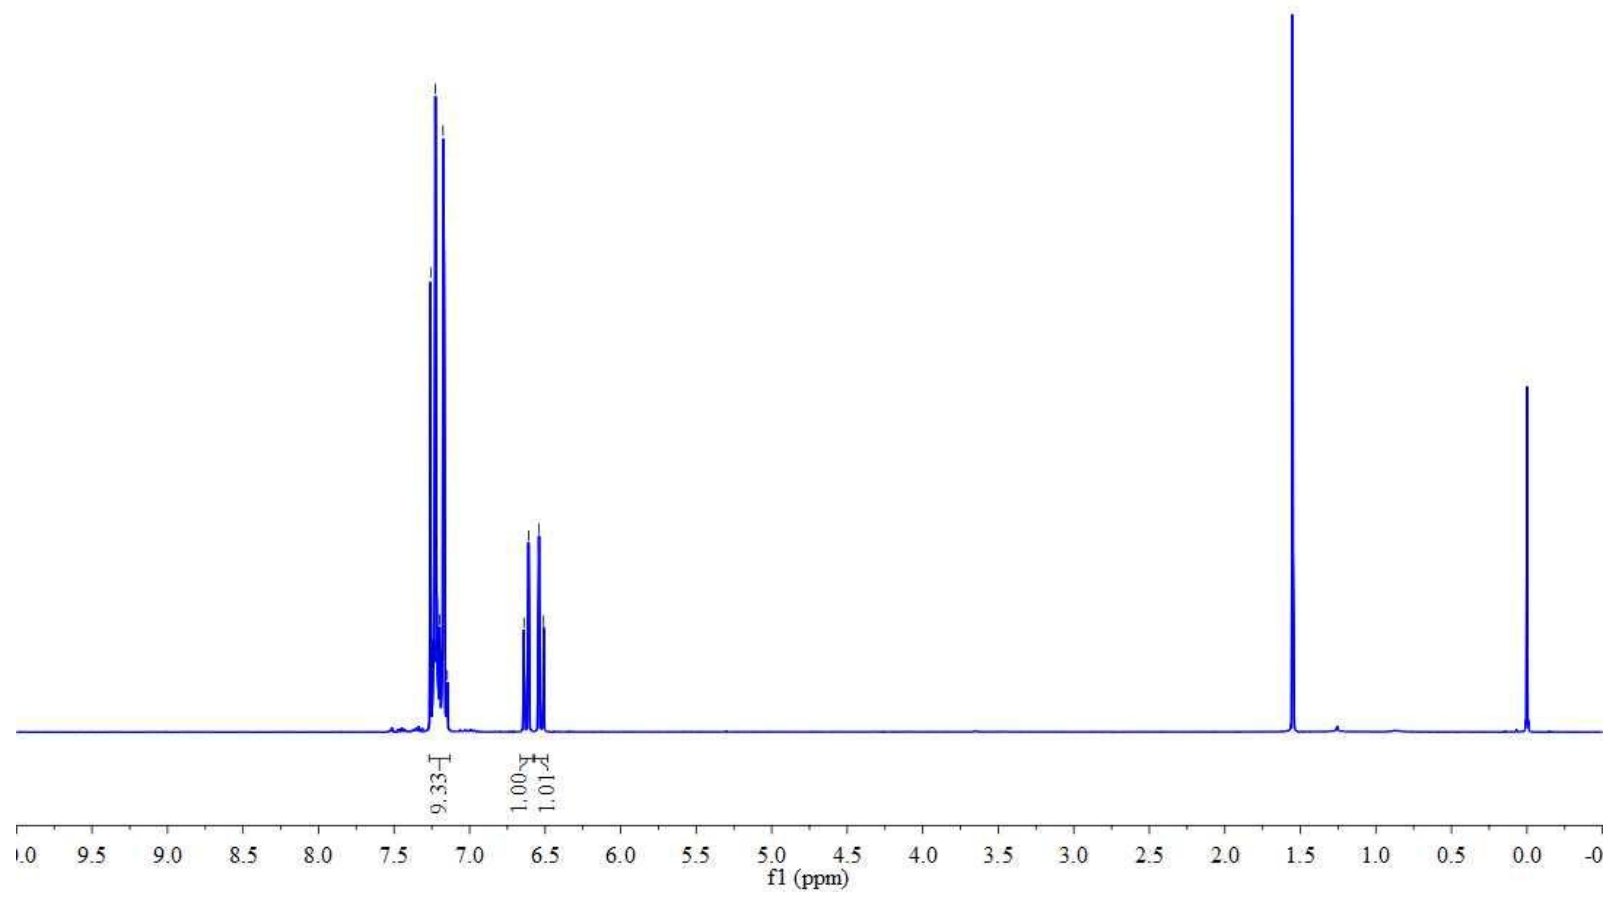

136.897  
135.677  
132.774  
130.983  
130.248  
128.953  
128.838  
128.441  
128.373  
127.353

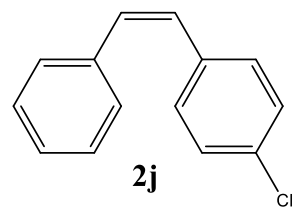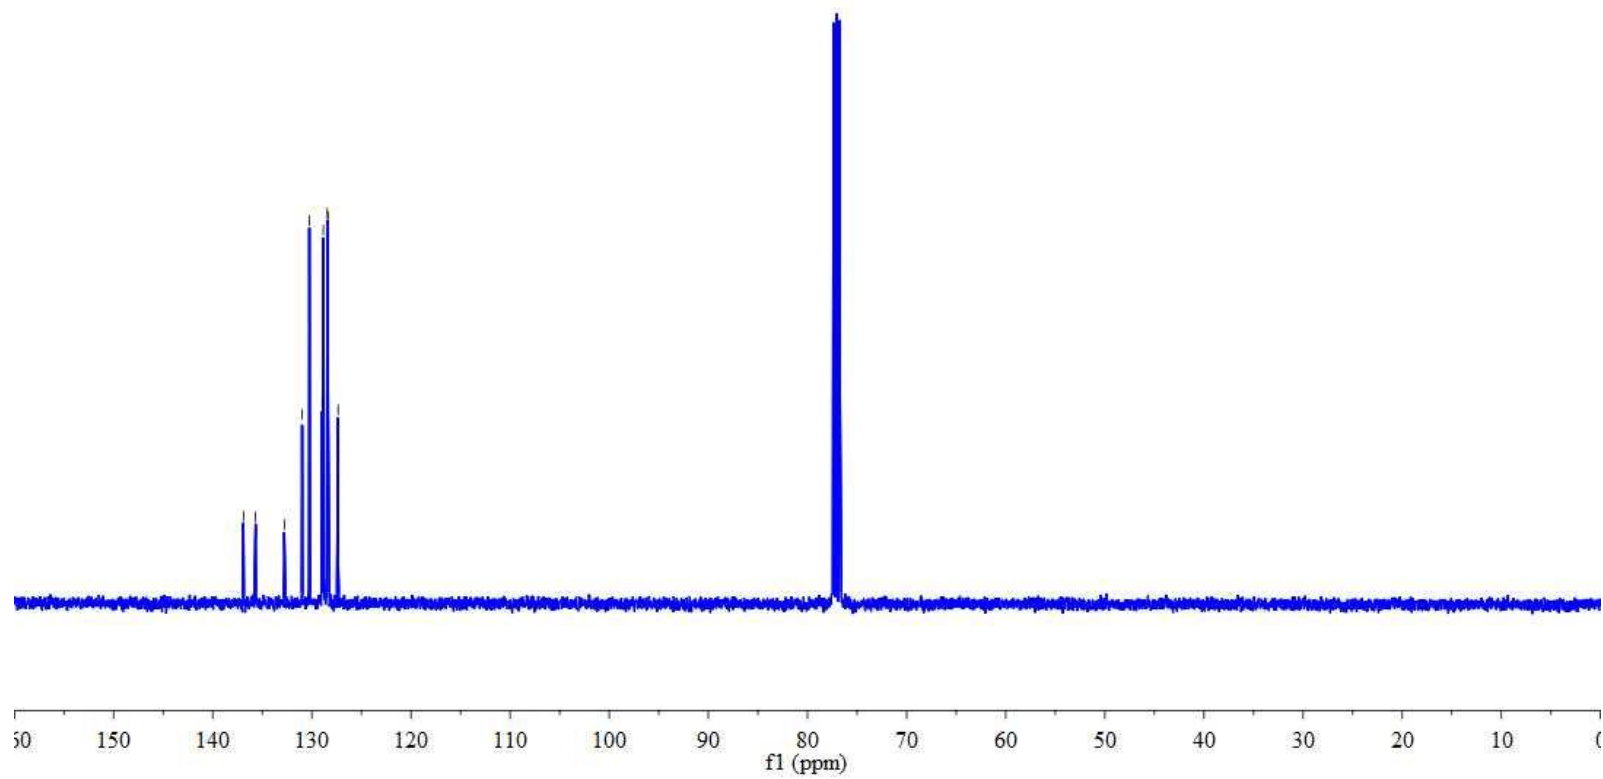

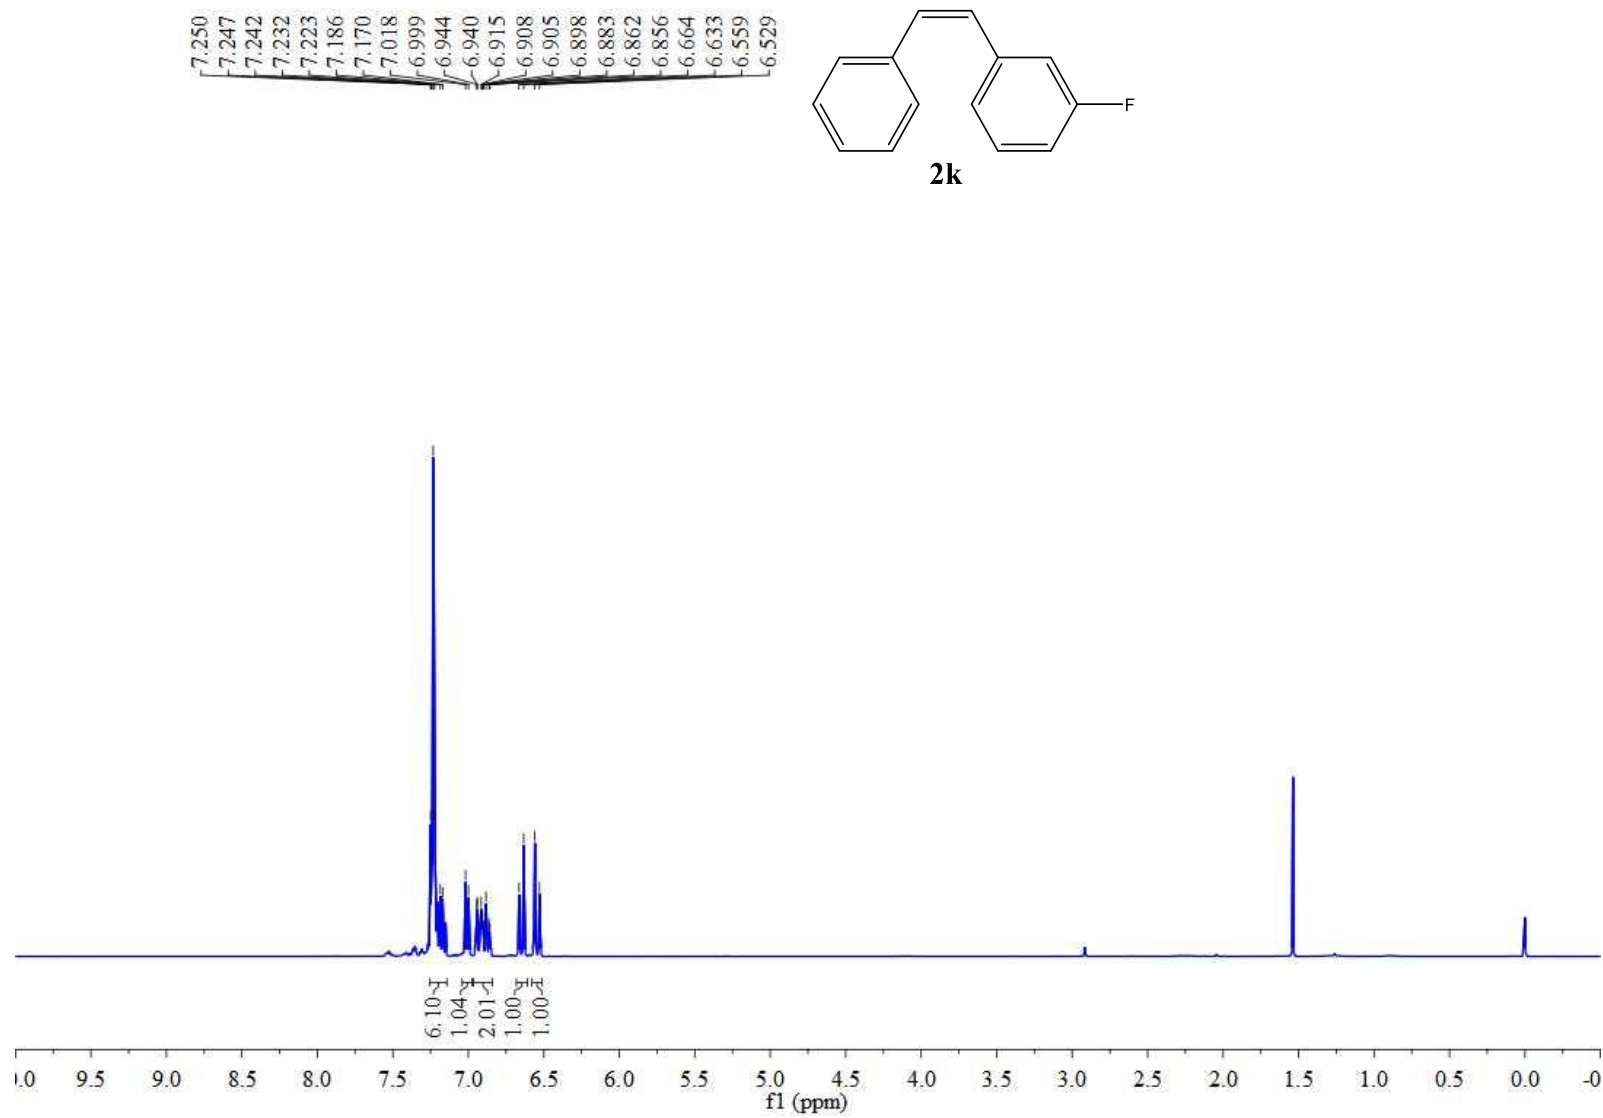

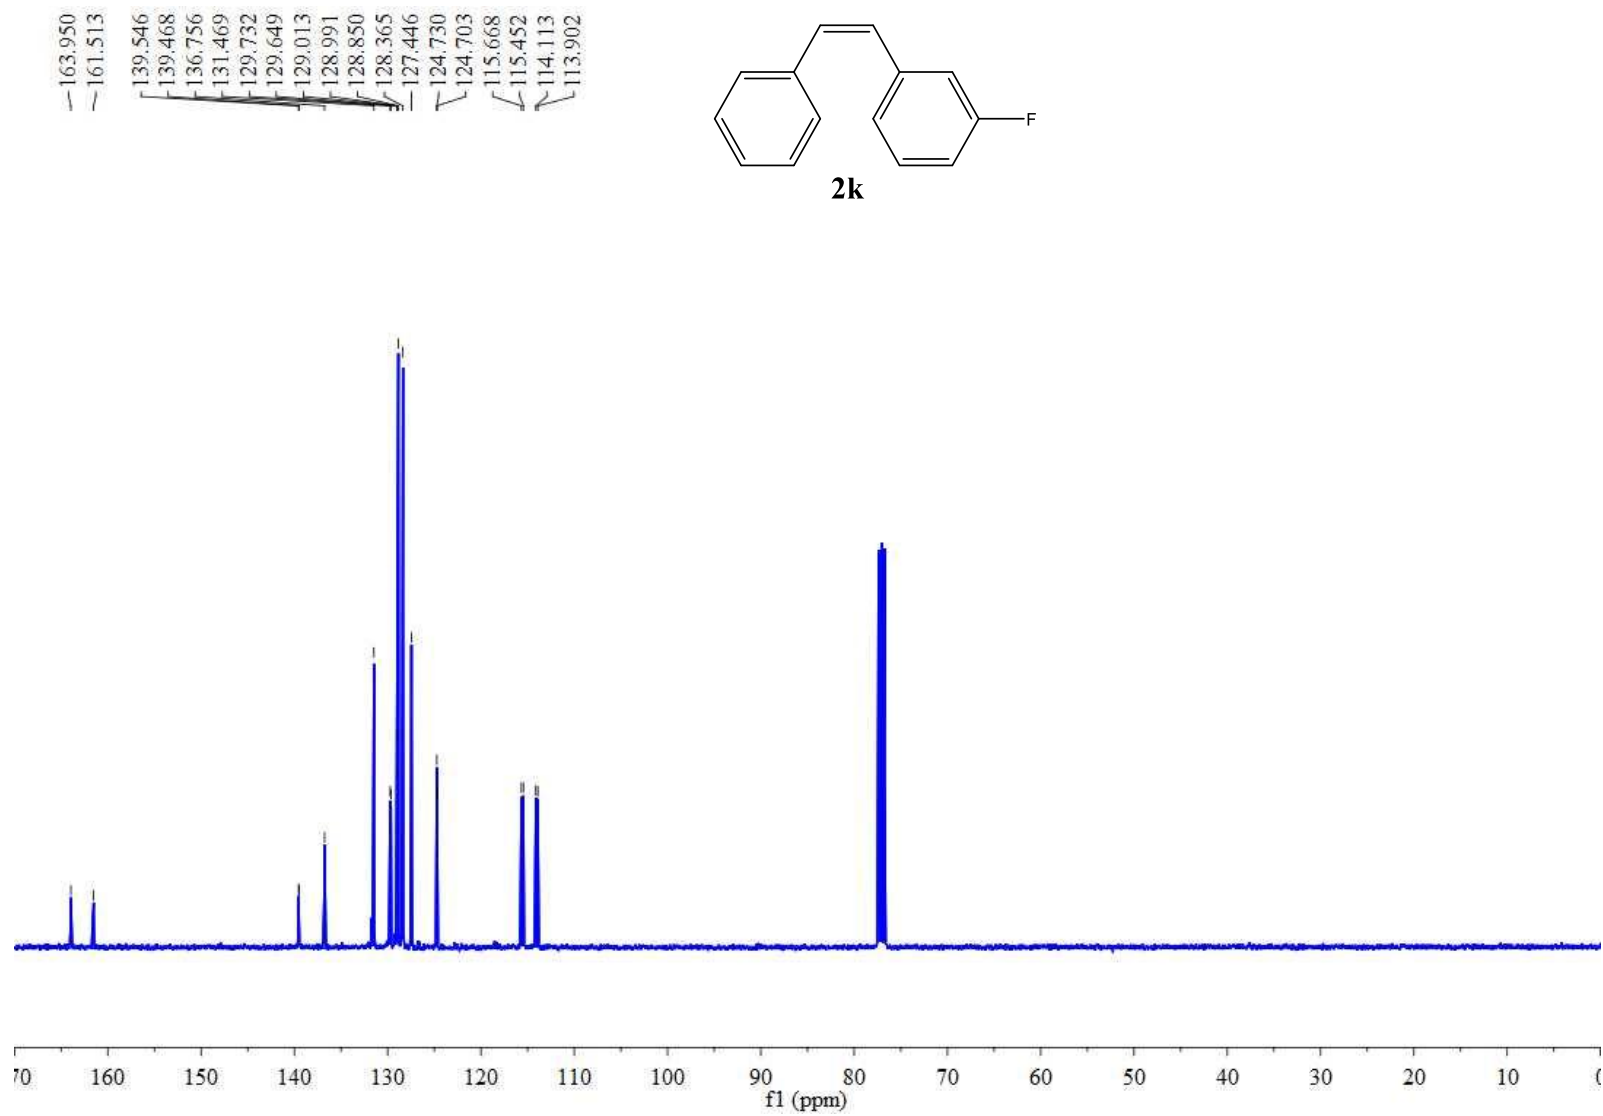

7.197  
7.191  
7.183  
7.175  
7.167  
7.161  
7.154  
6.948  
6.940  
6.935  
6.924  
6.918  
6.913  
6.902  
6.896  
6.889  
6.535

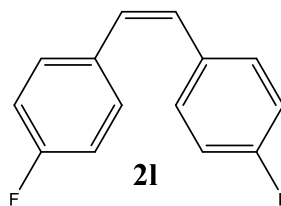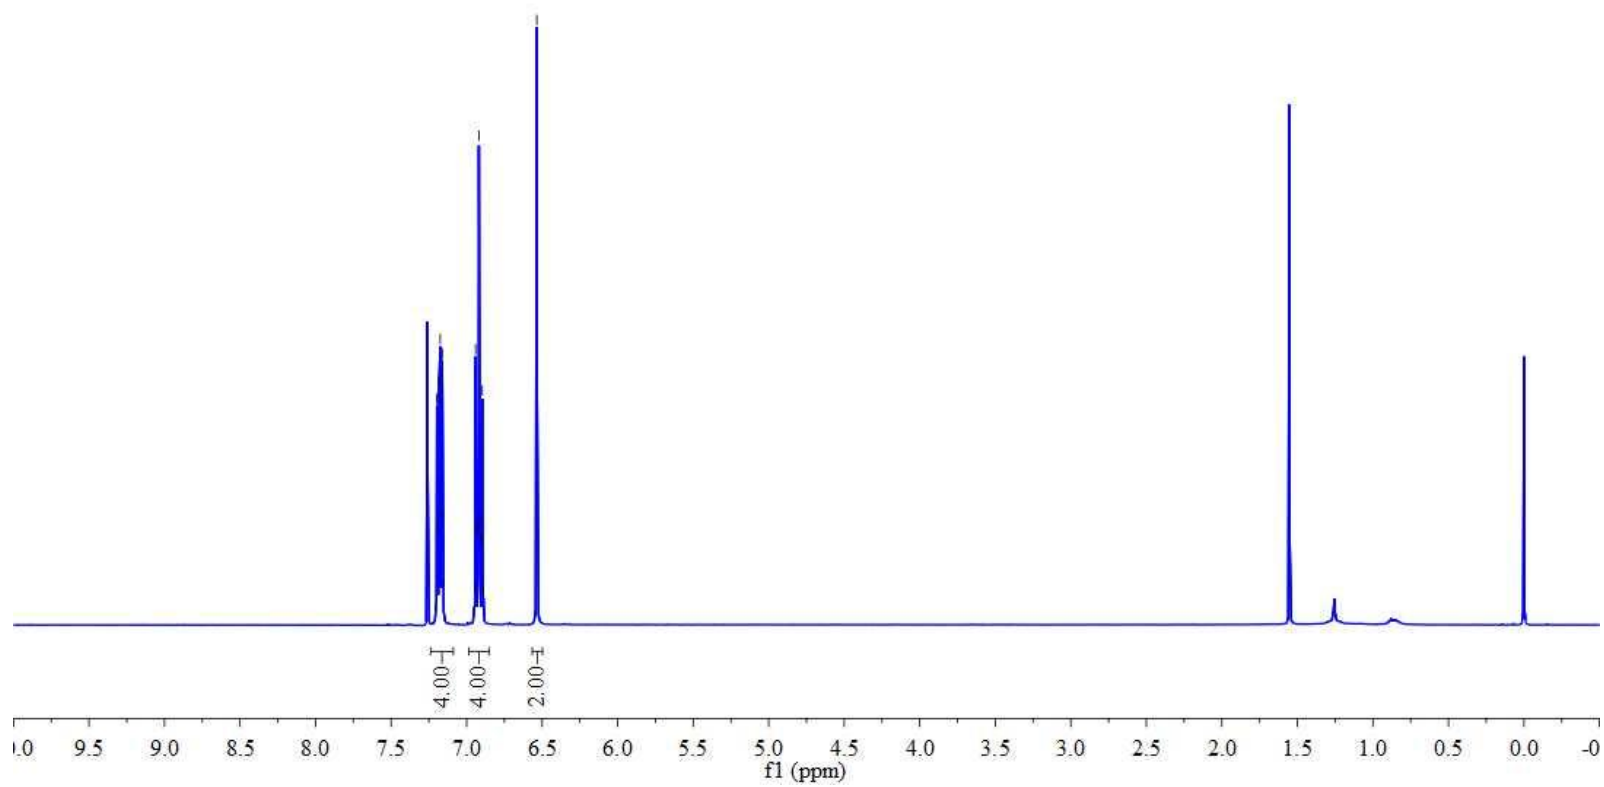

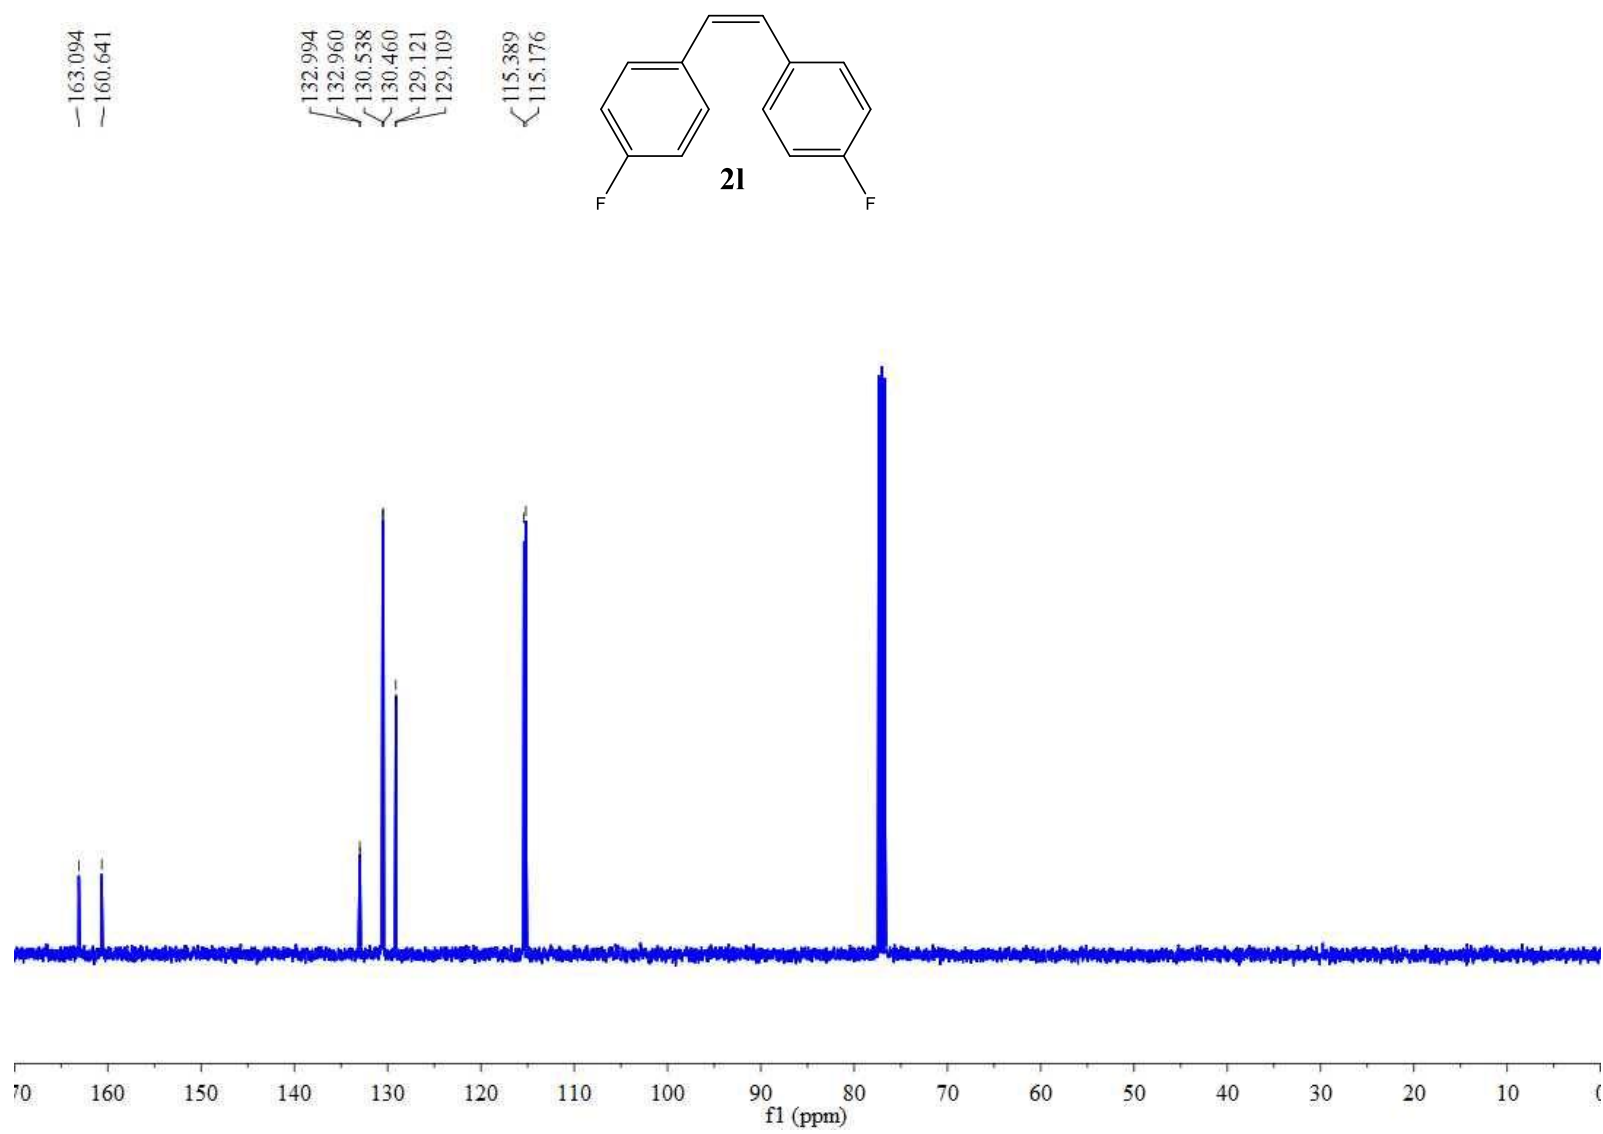

7.250  
7.232  
7.230  
7.226  
7.219  
7.212  
7.209  
7.204  
7.198  
7.191  
7.182  
7.177  
6.921  
6.899  
6.877  
6.605  
6.574  
6.549  
6.519

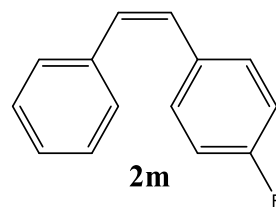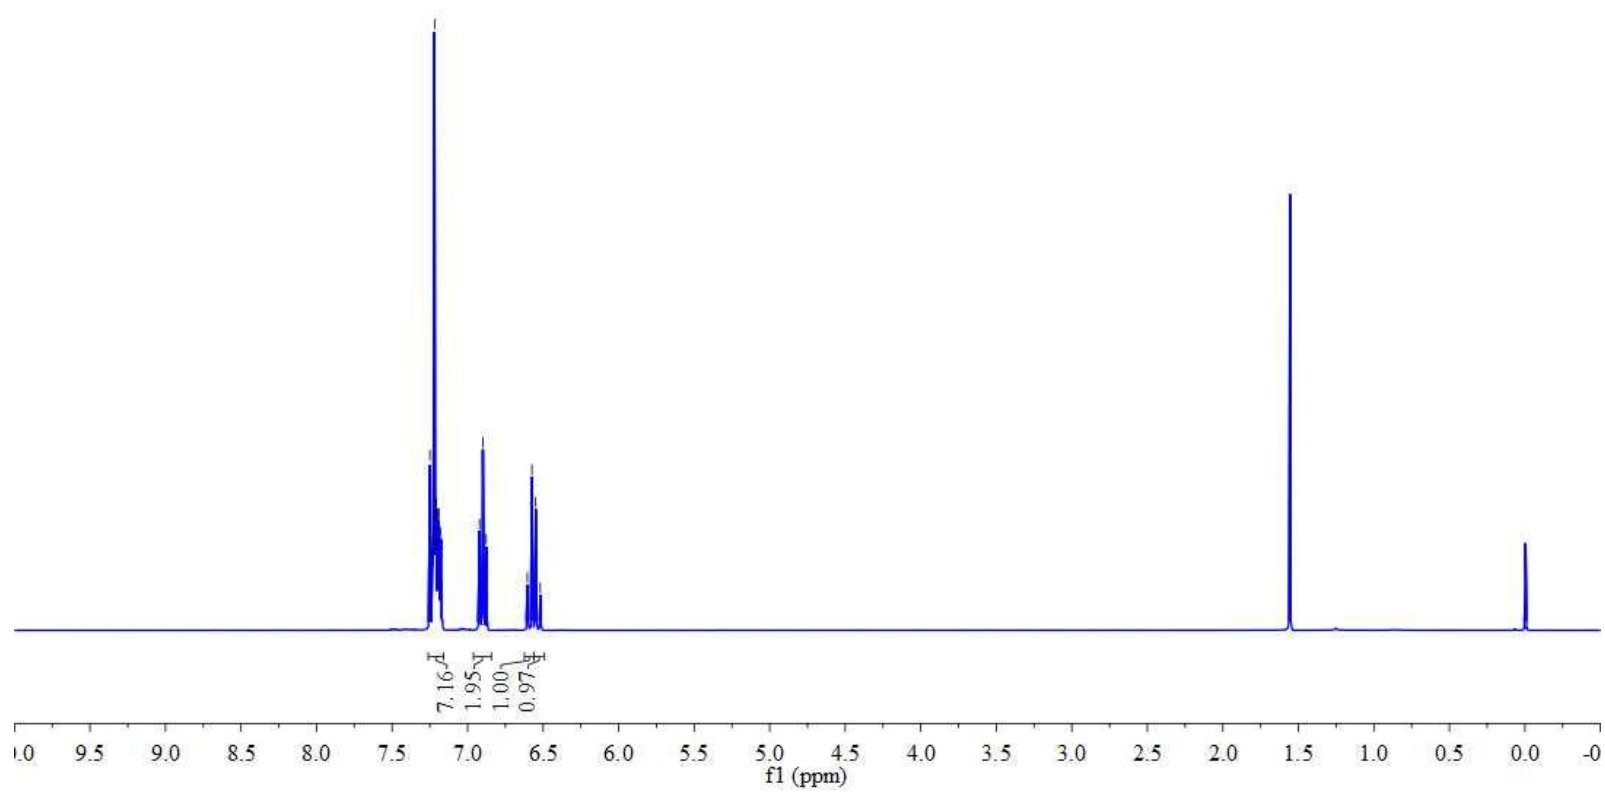



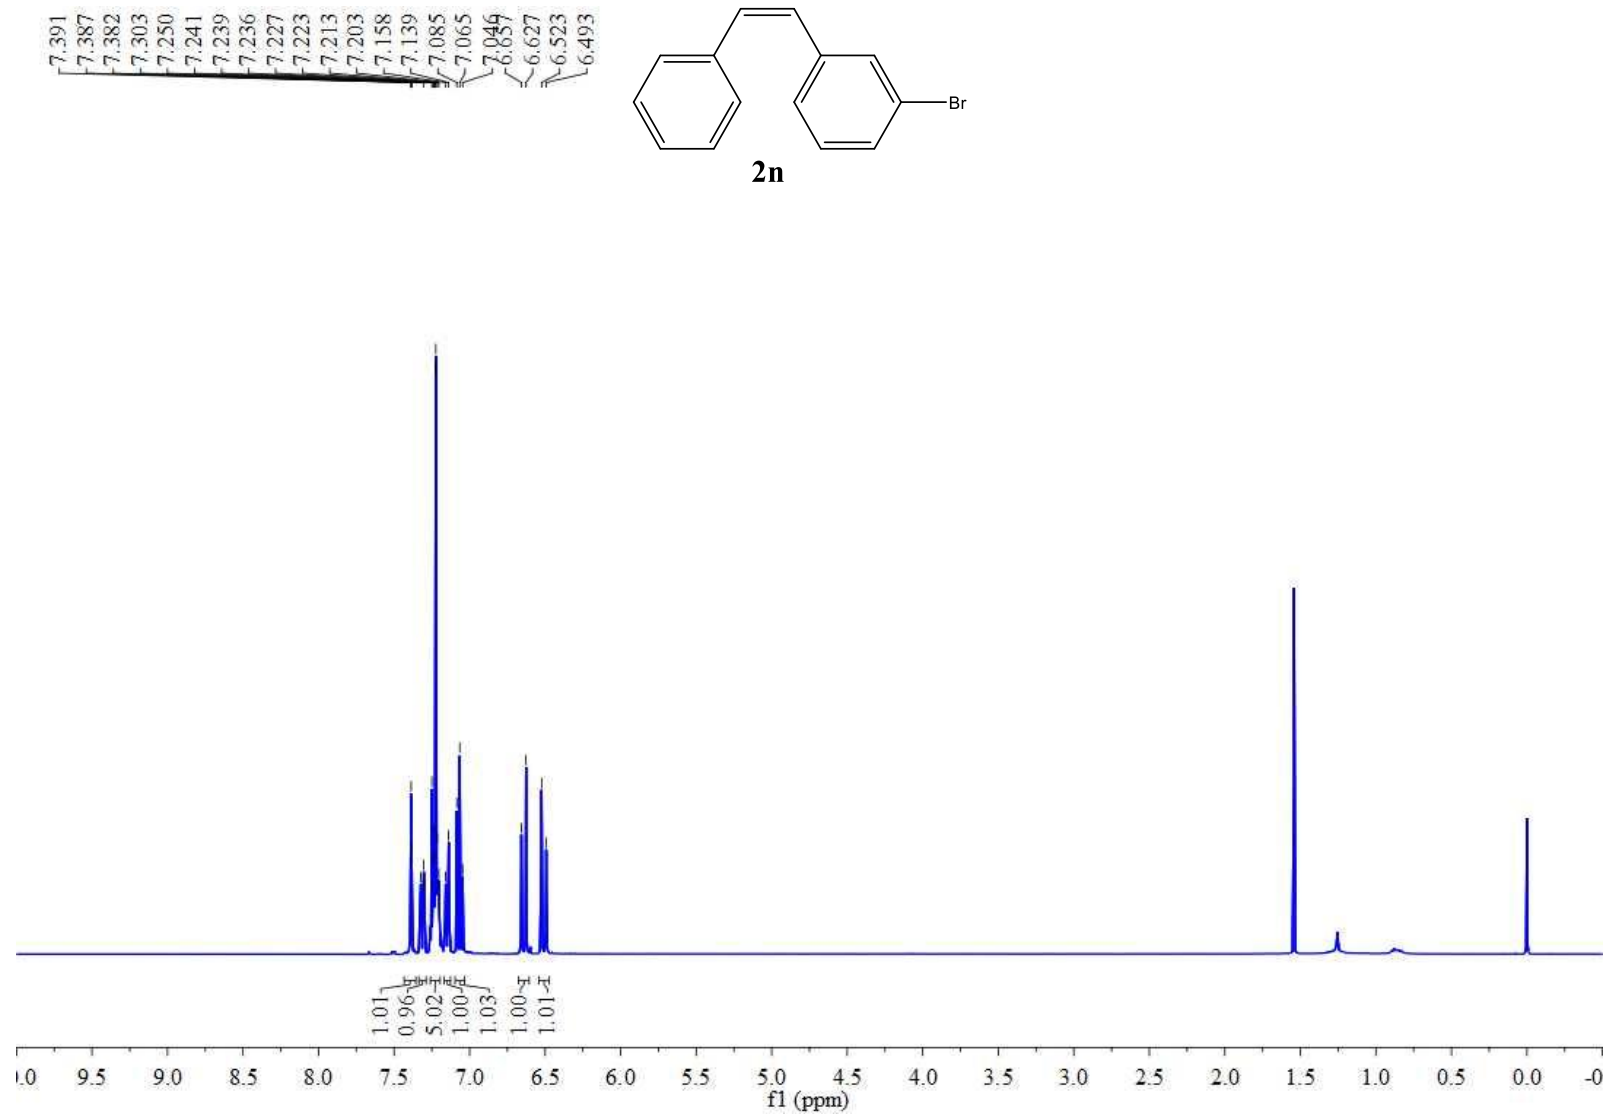

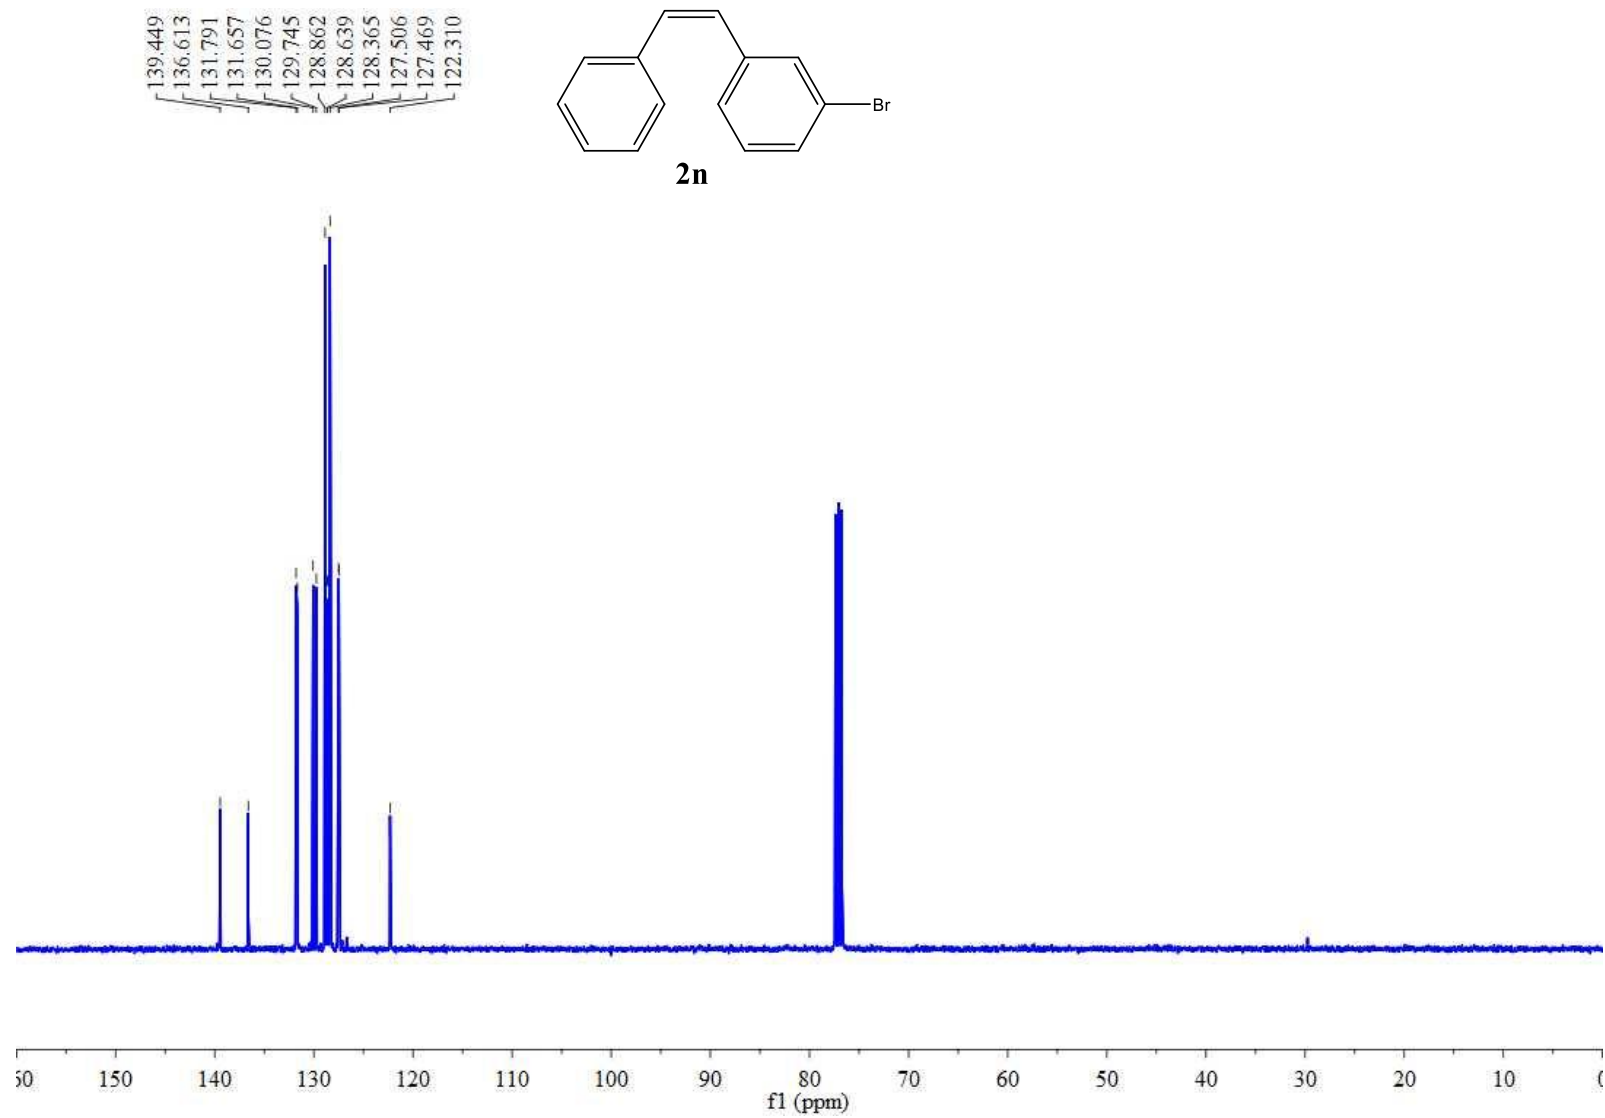

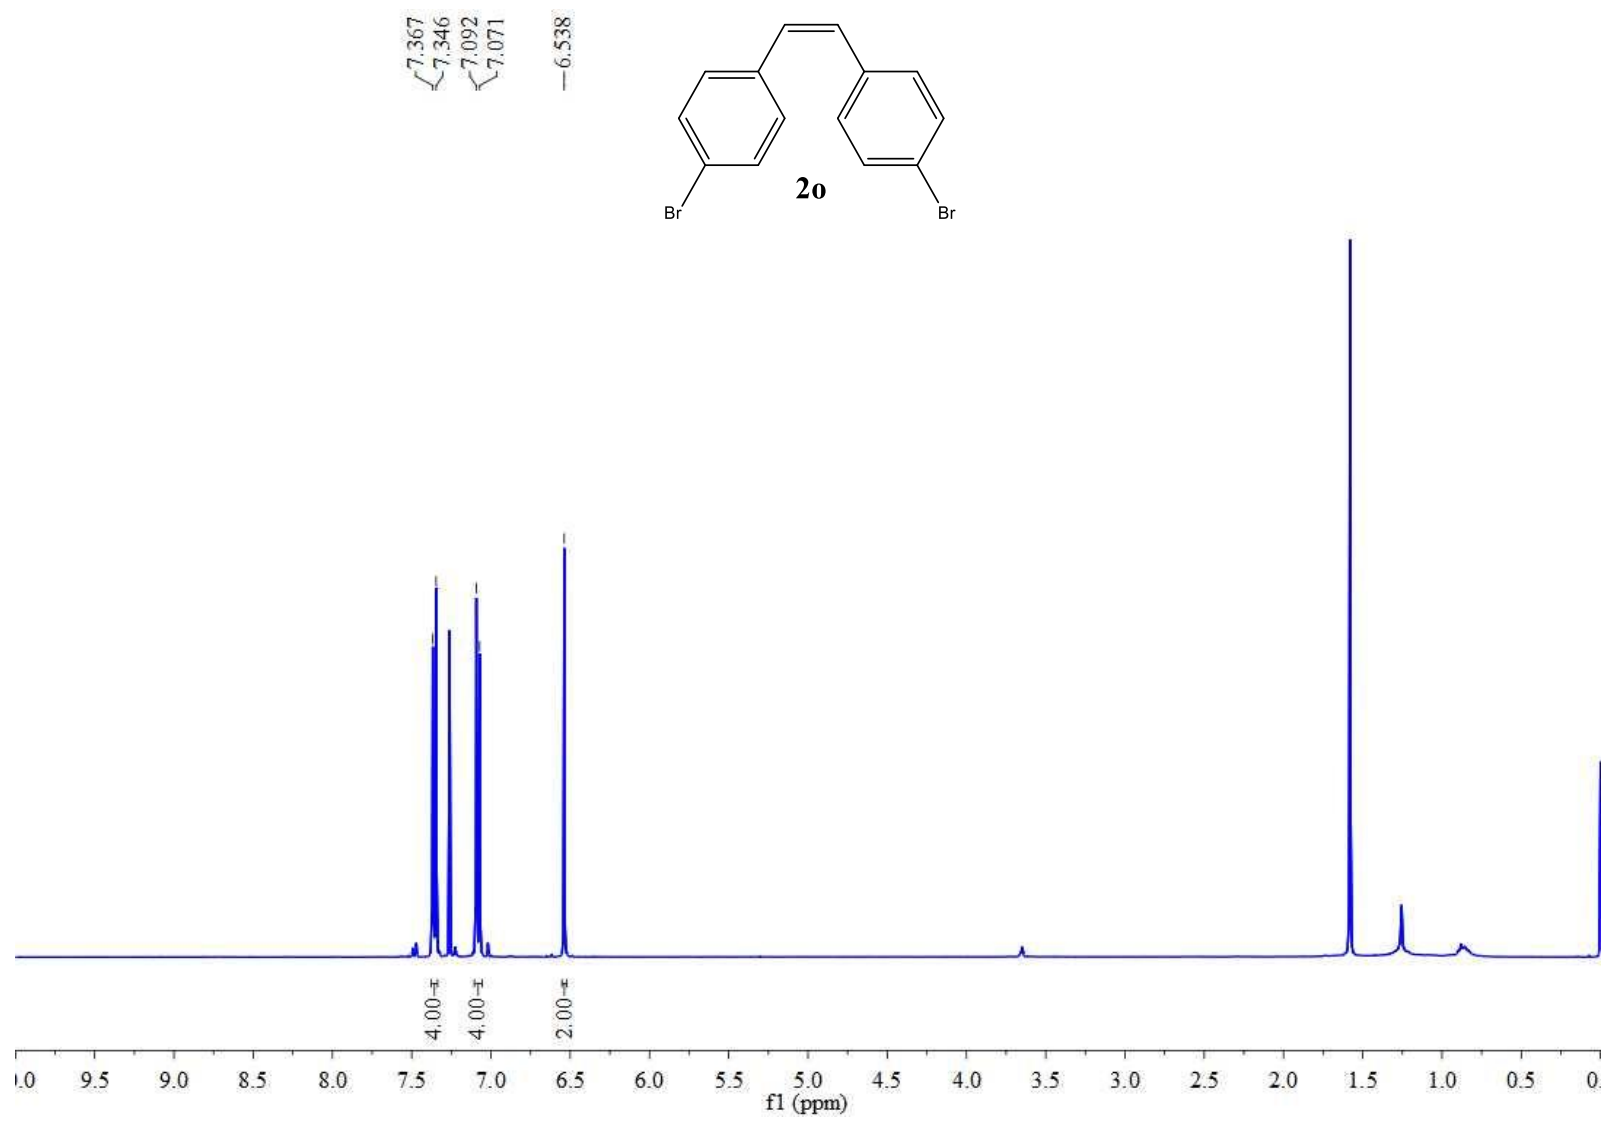

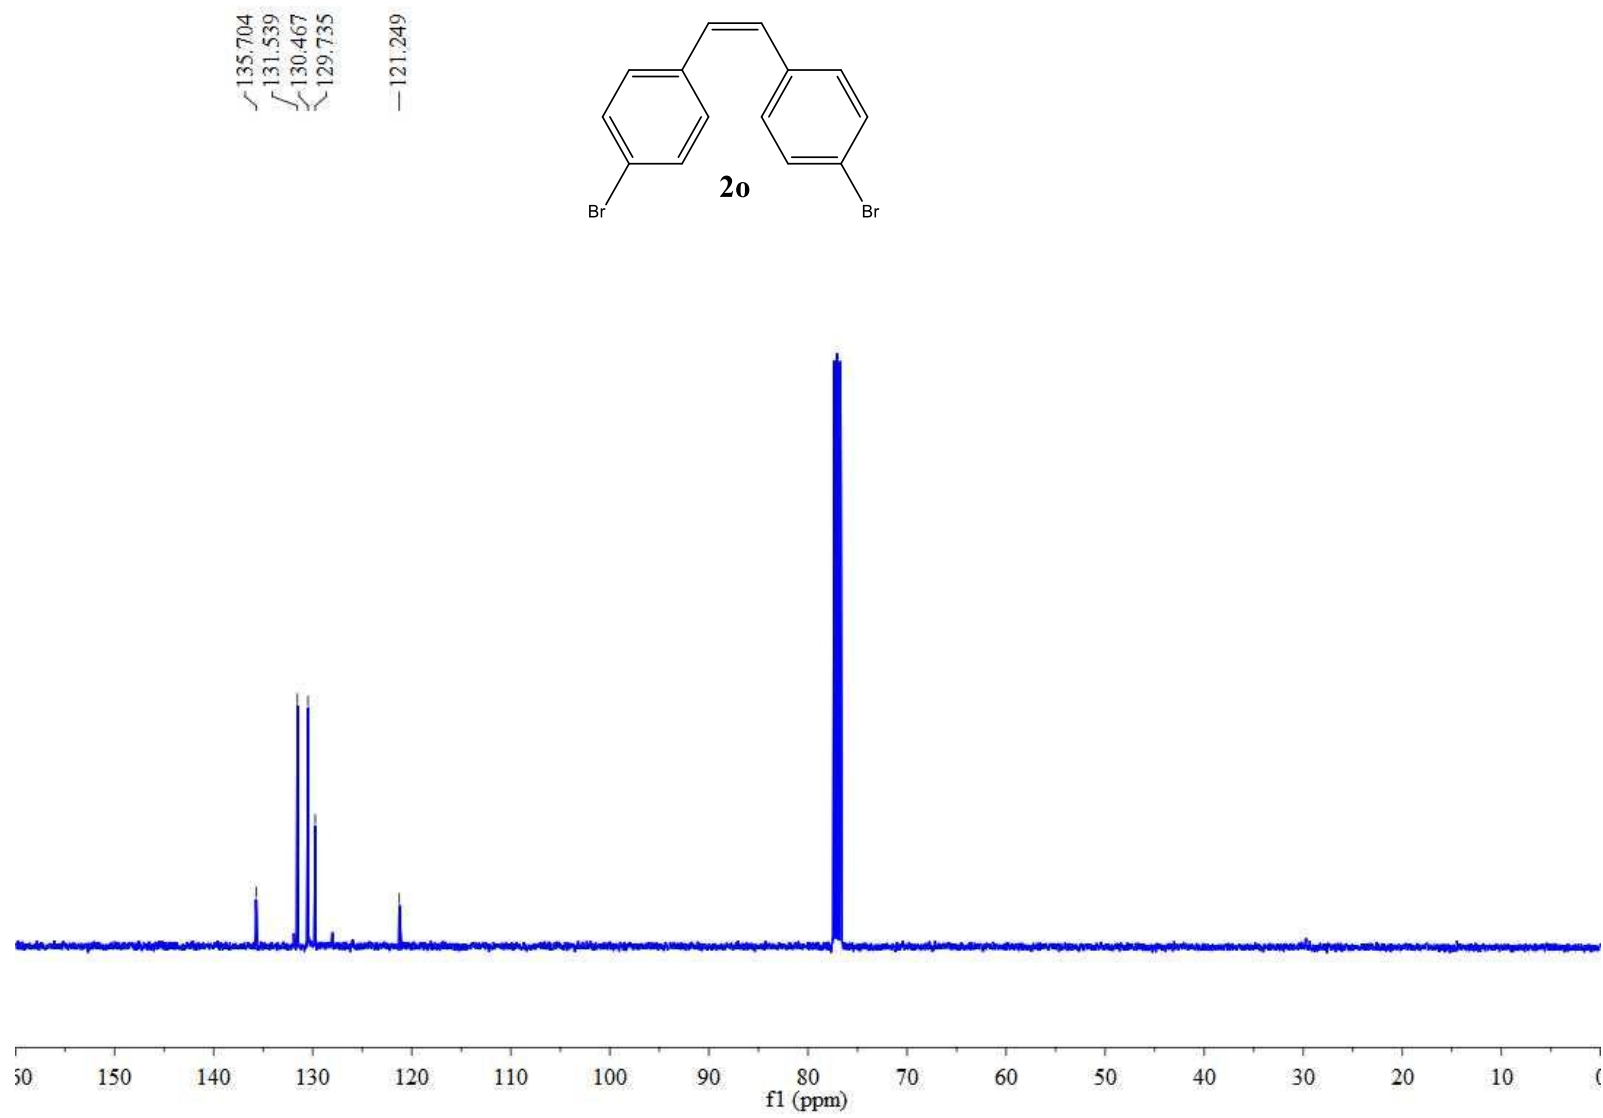

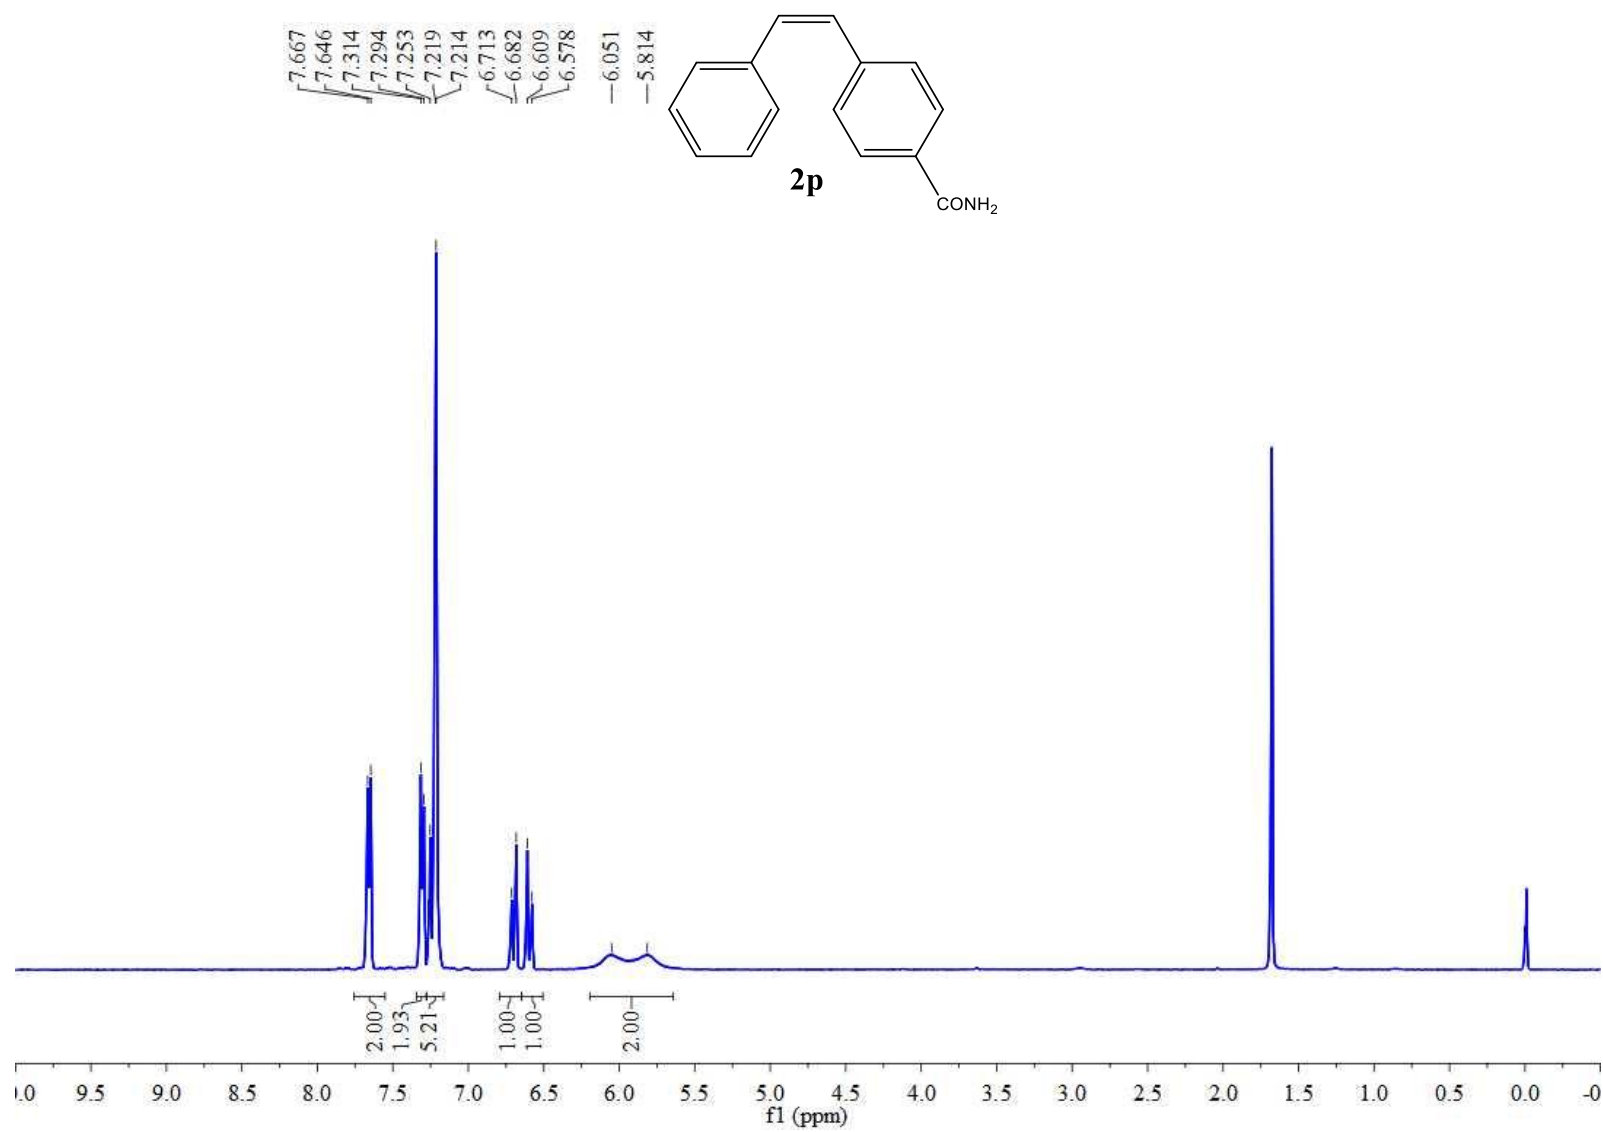

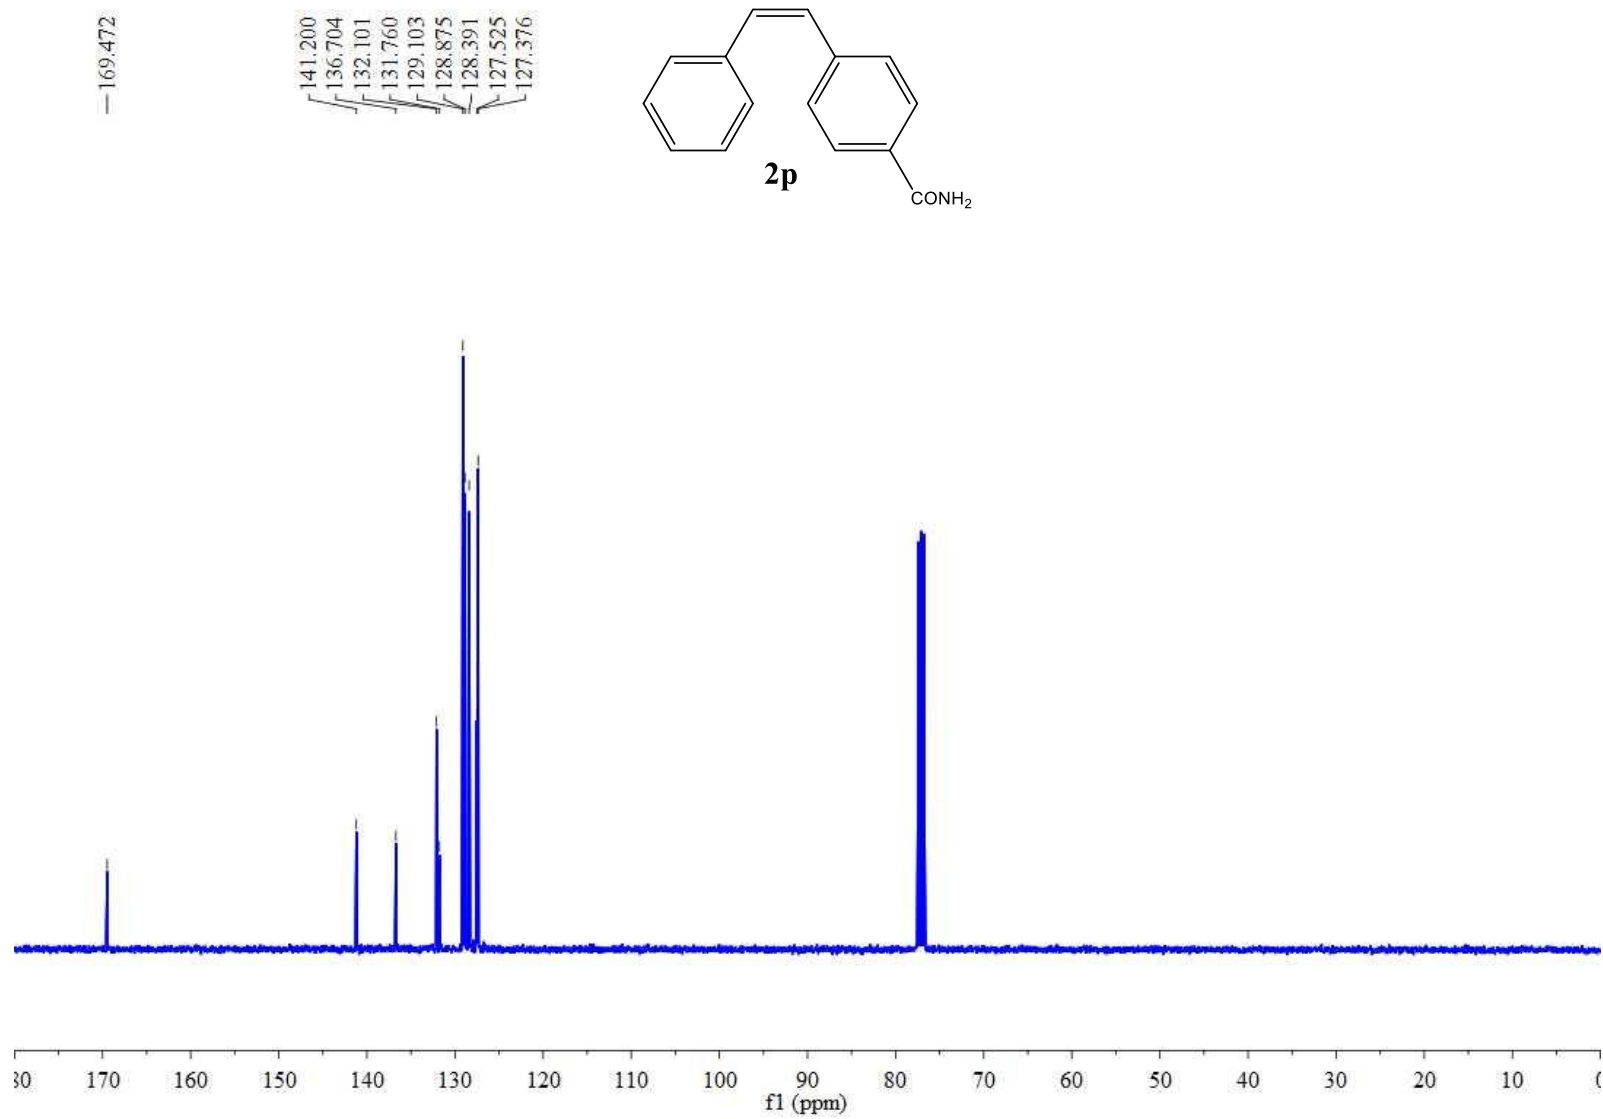

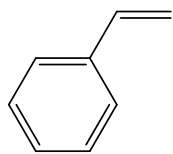

4a

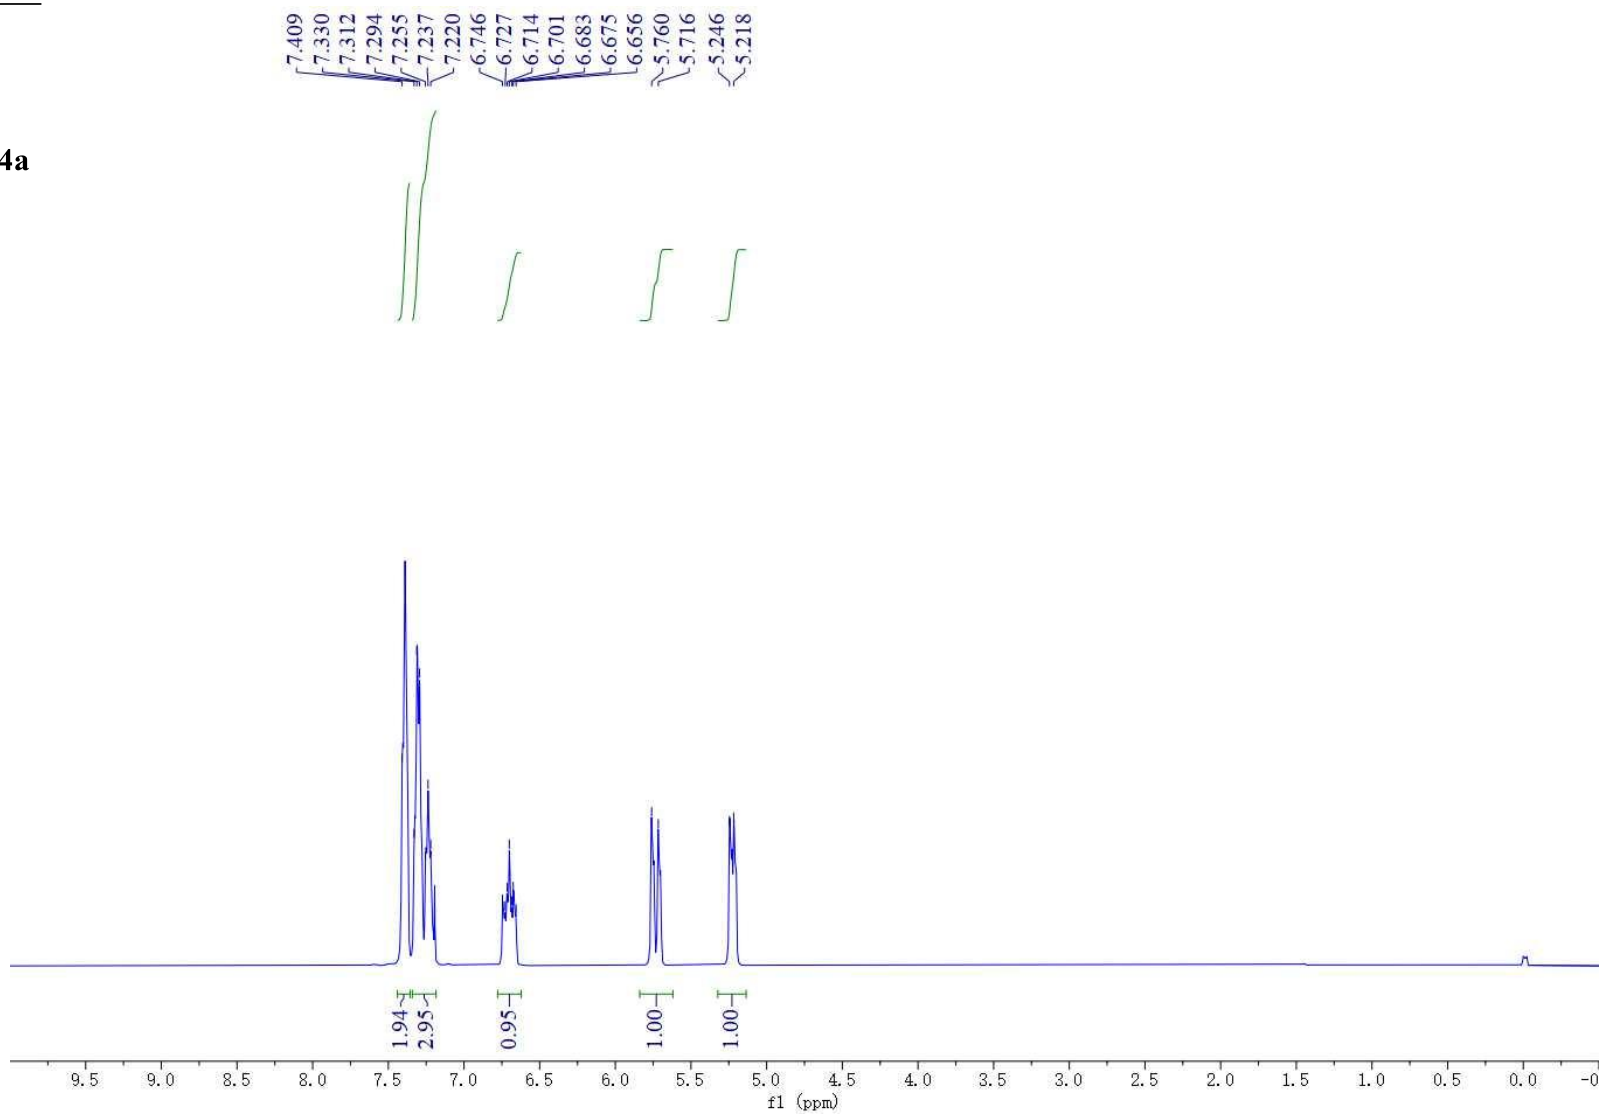

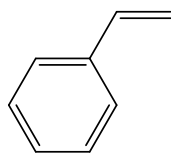

4a

137.697  
137.017  
128.660  
127.941  
126.355  
-113.940

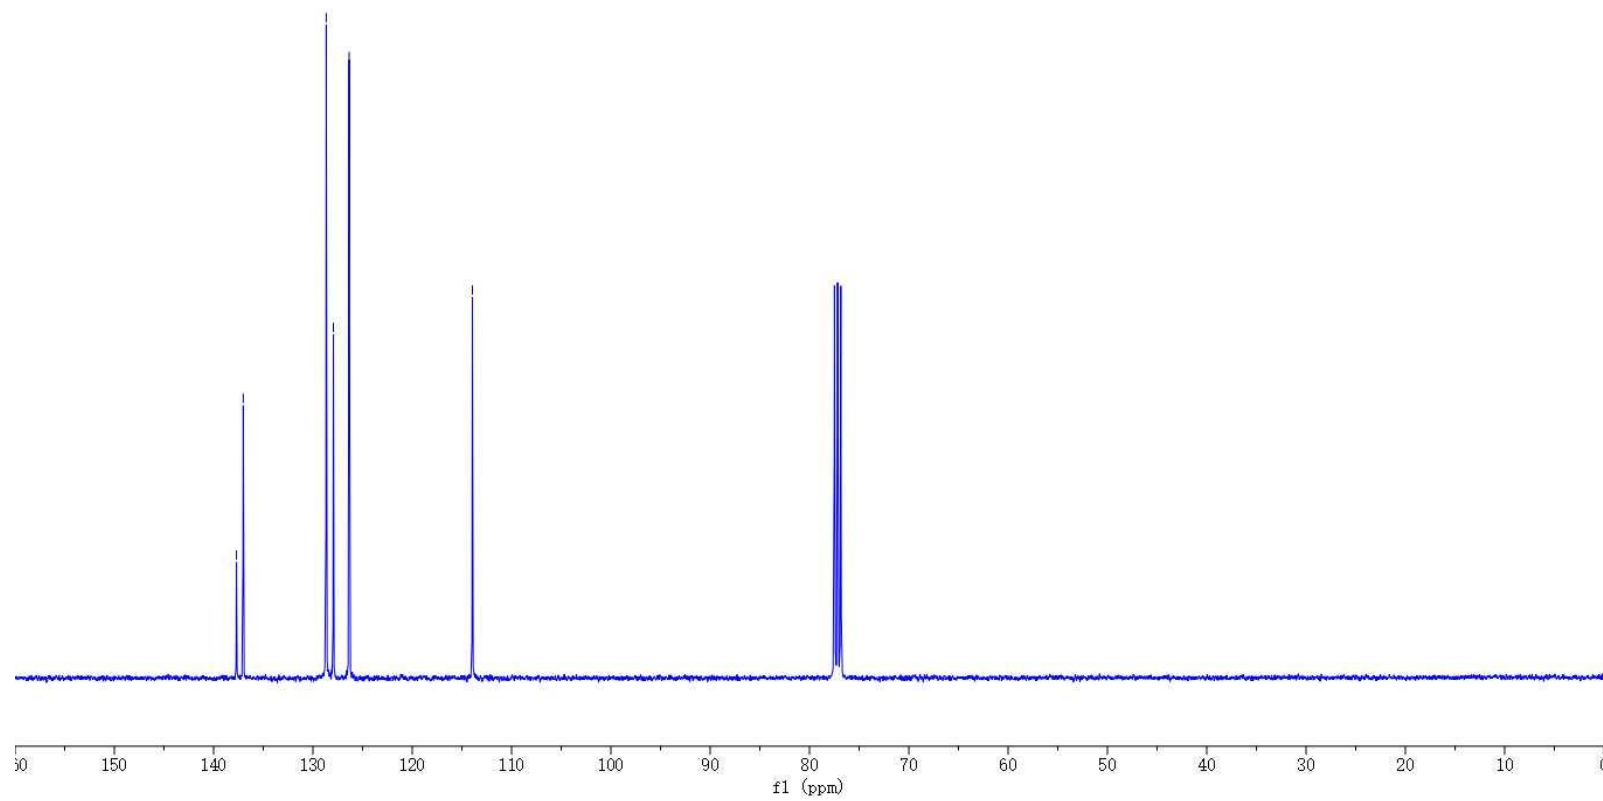

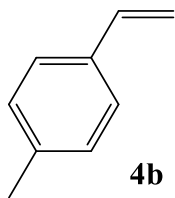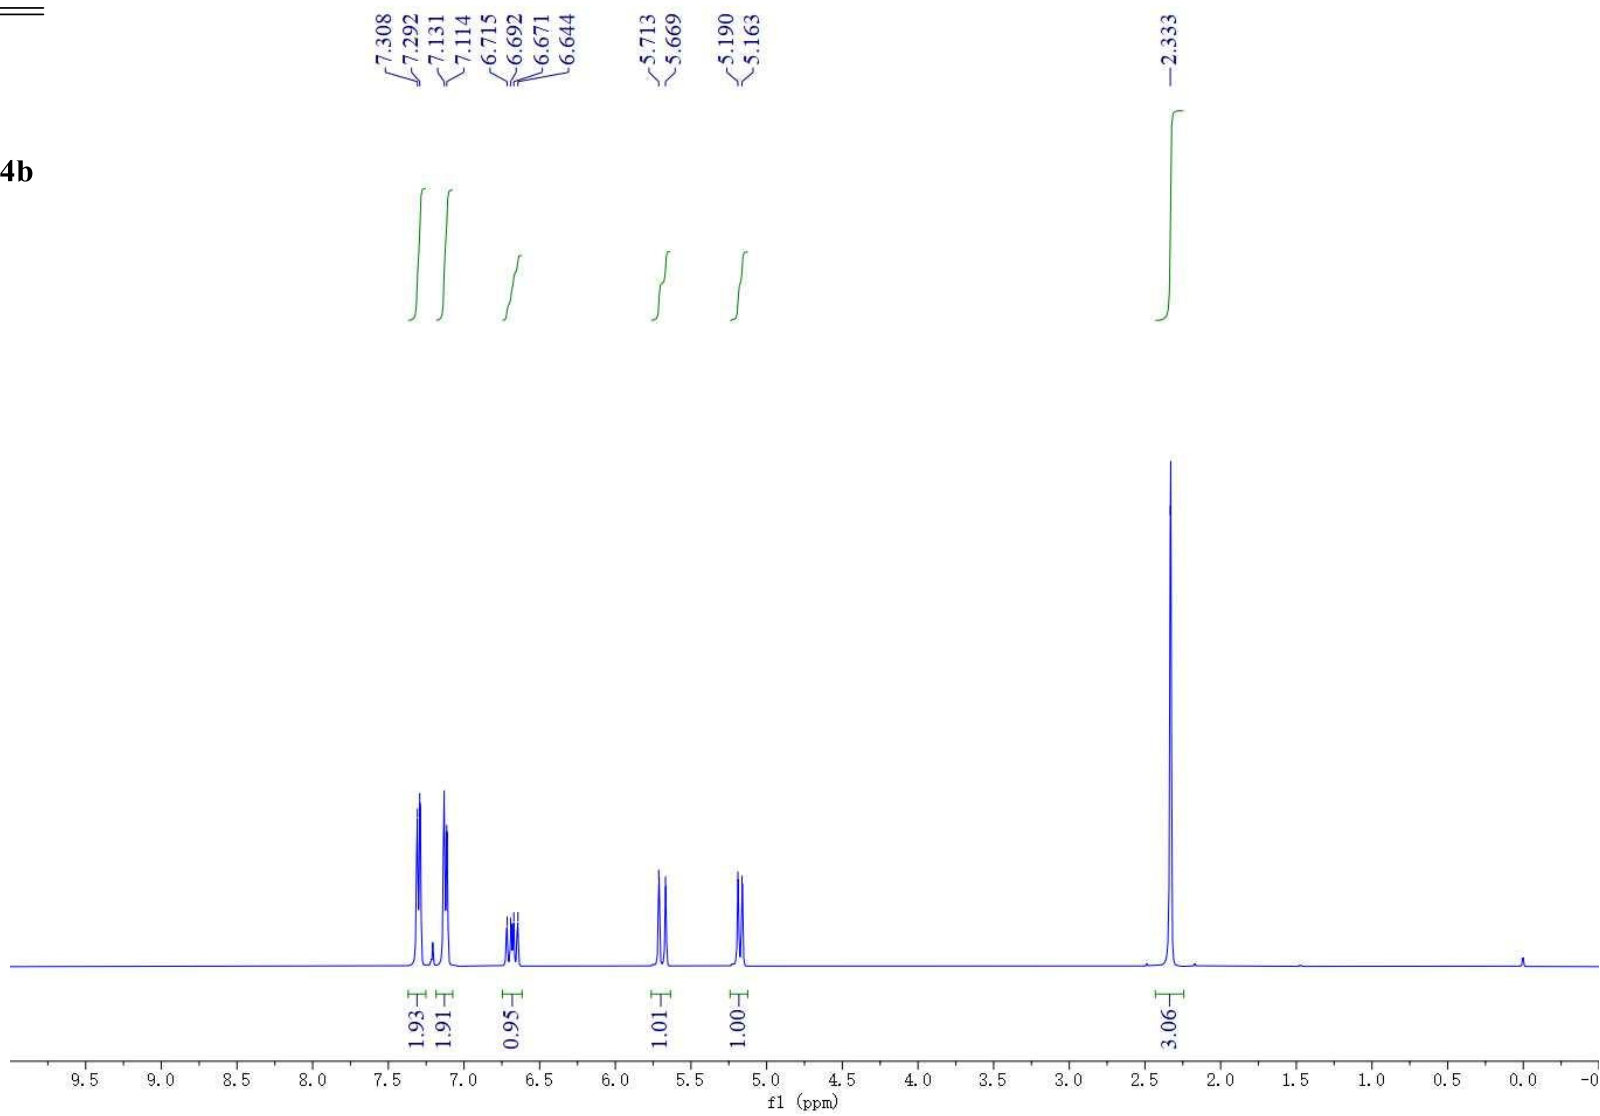

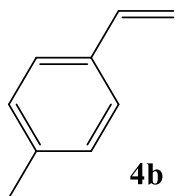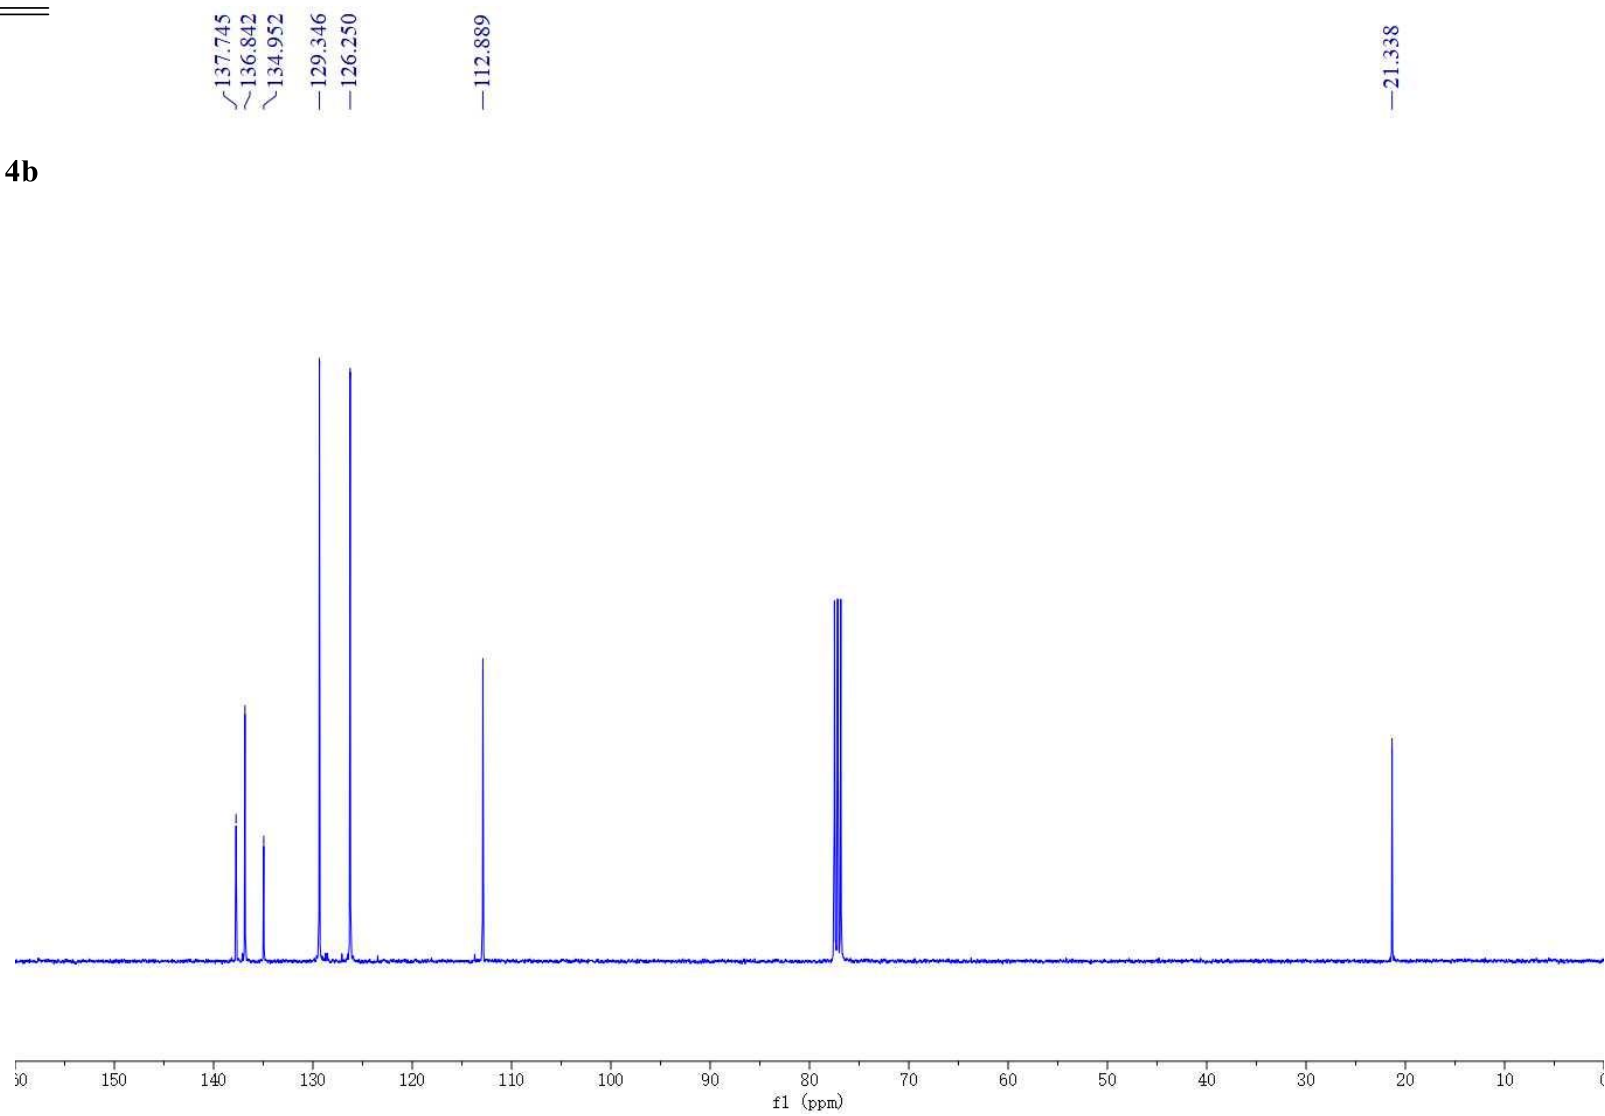

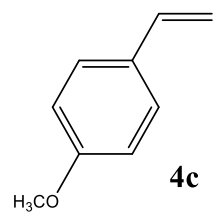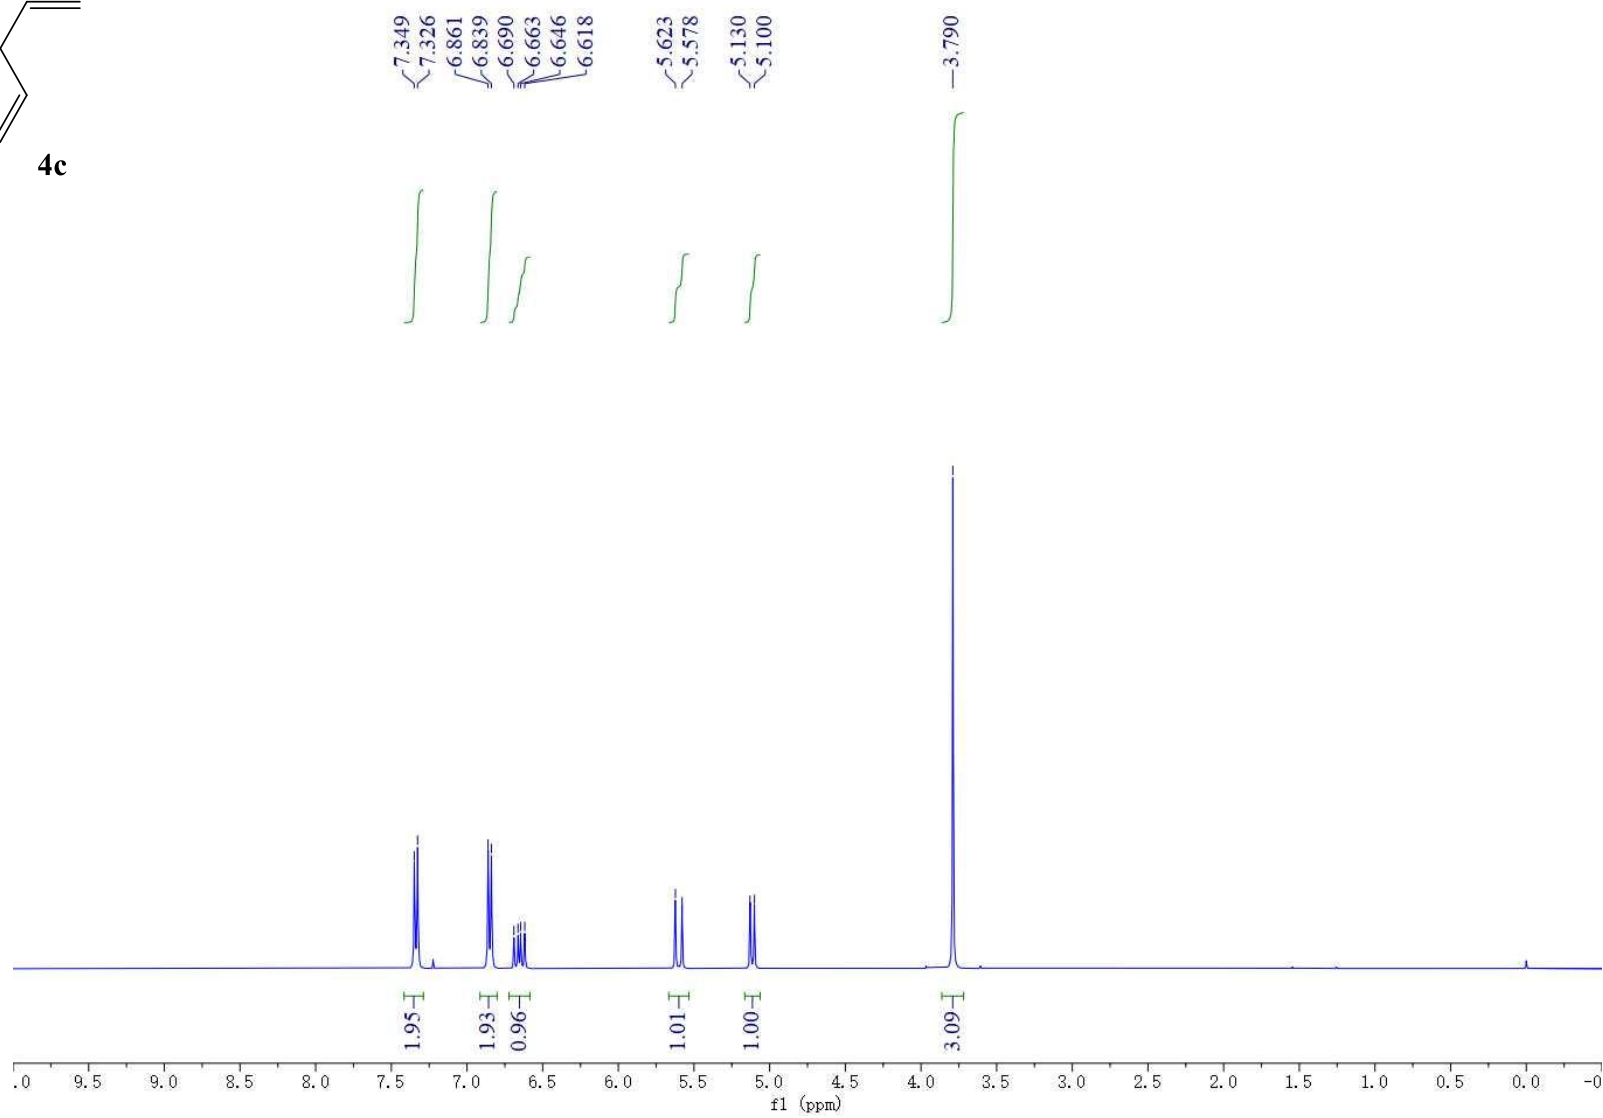

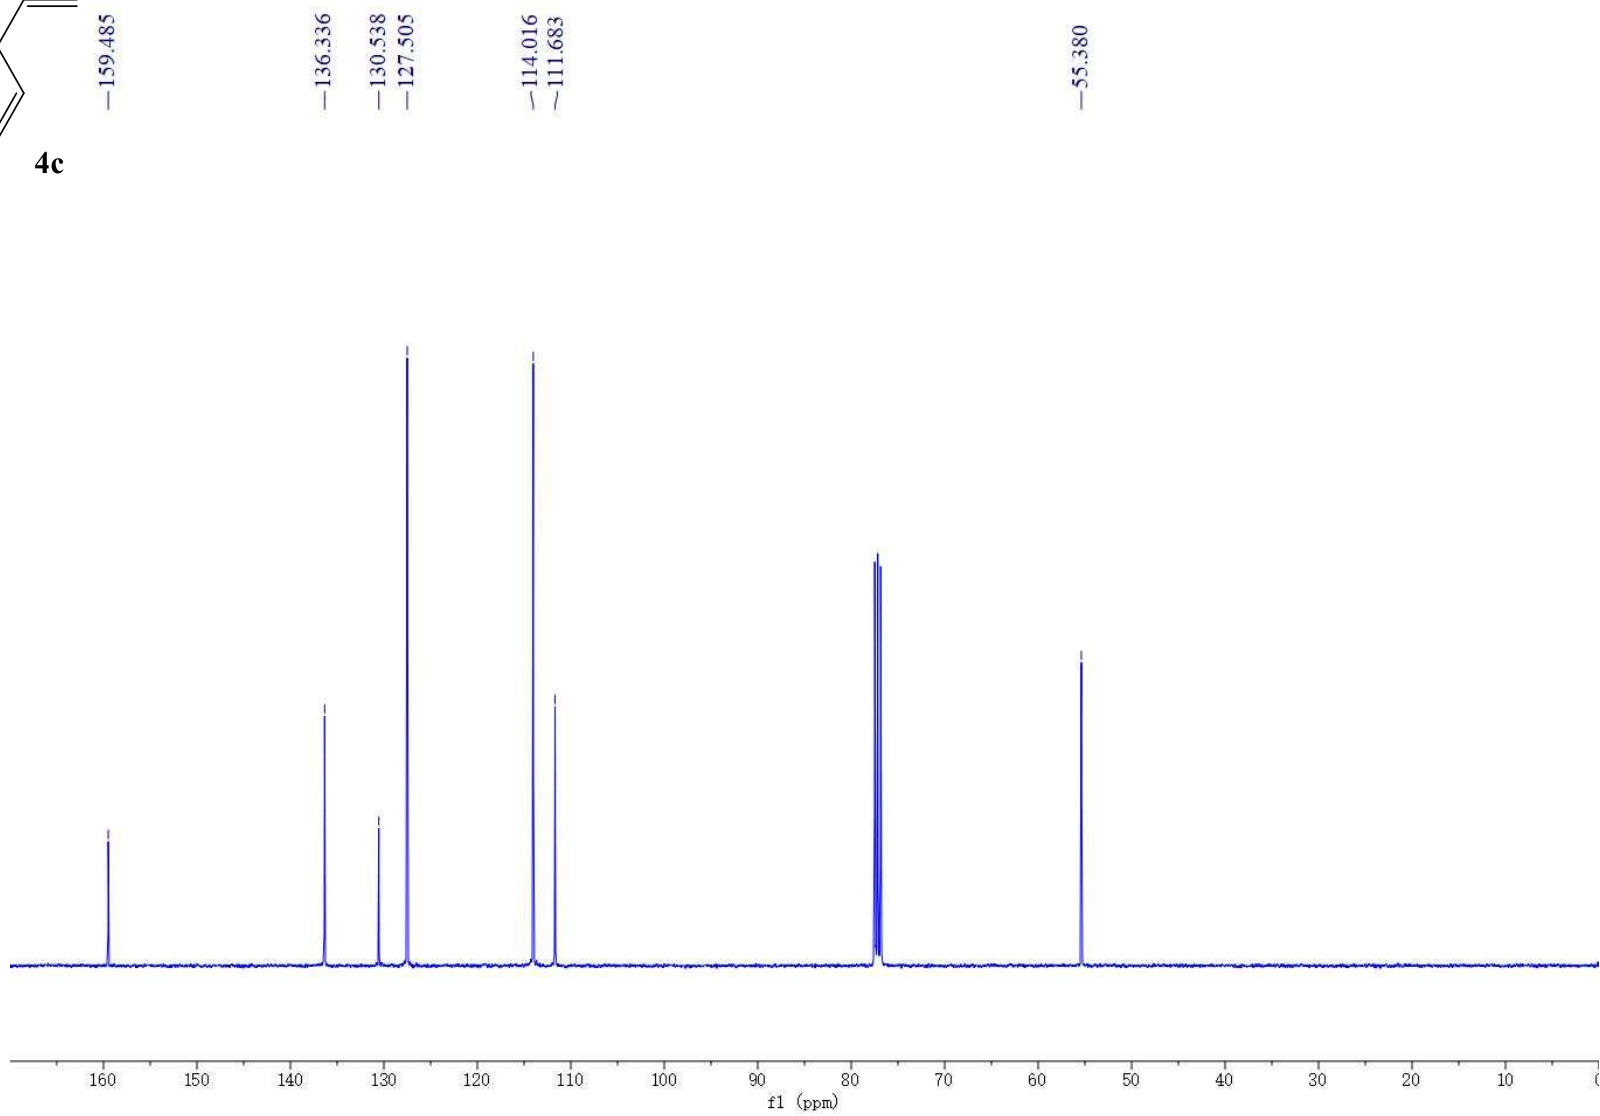

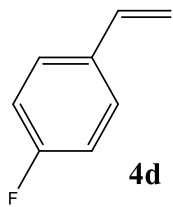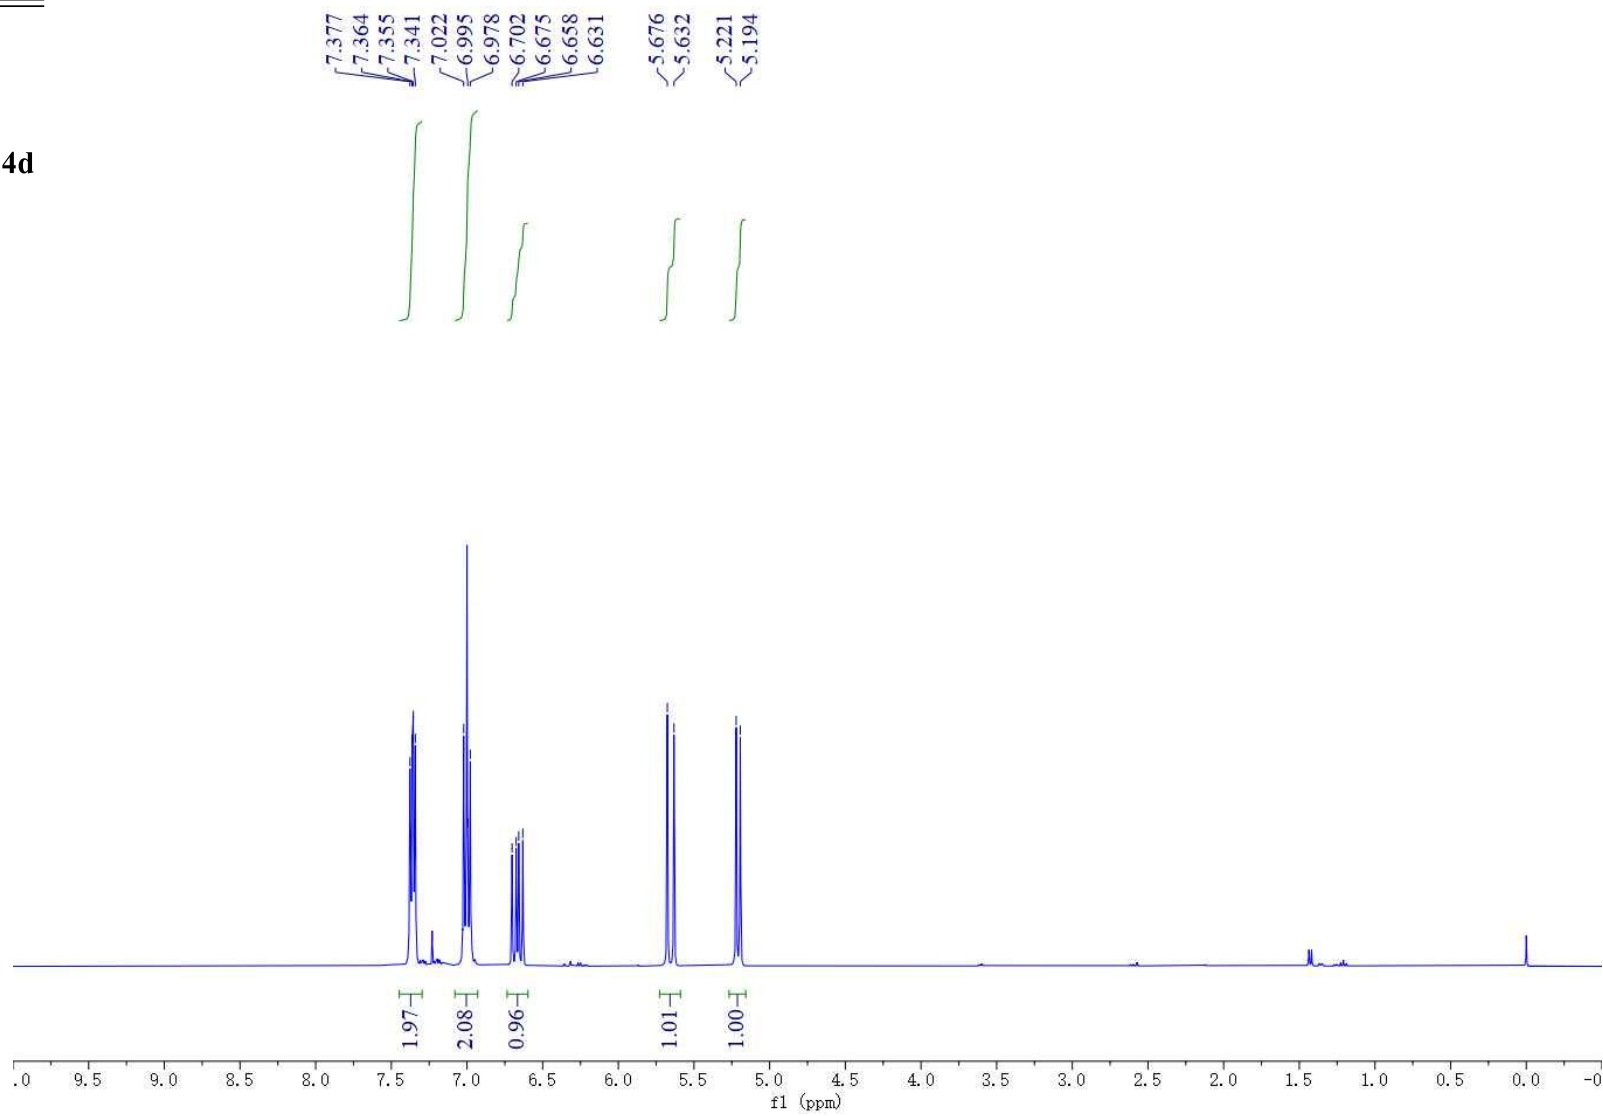

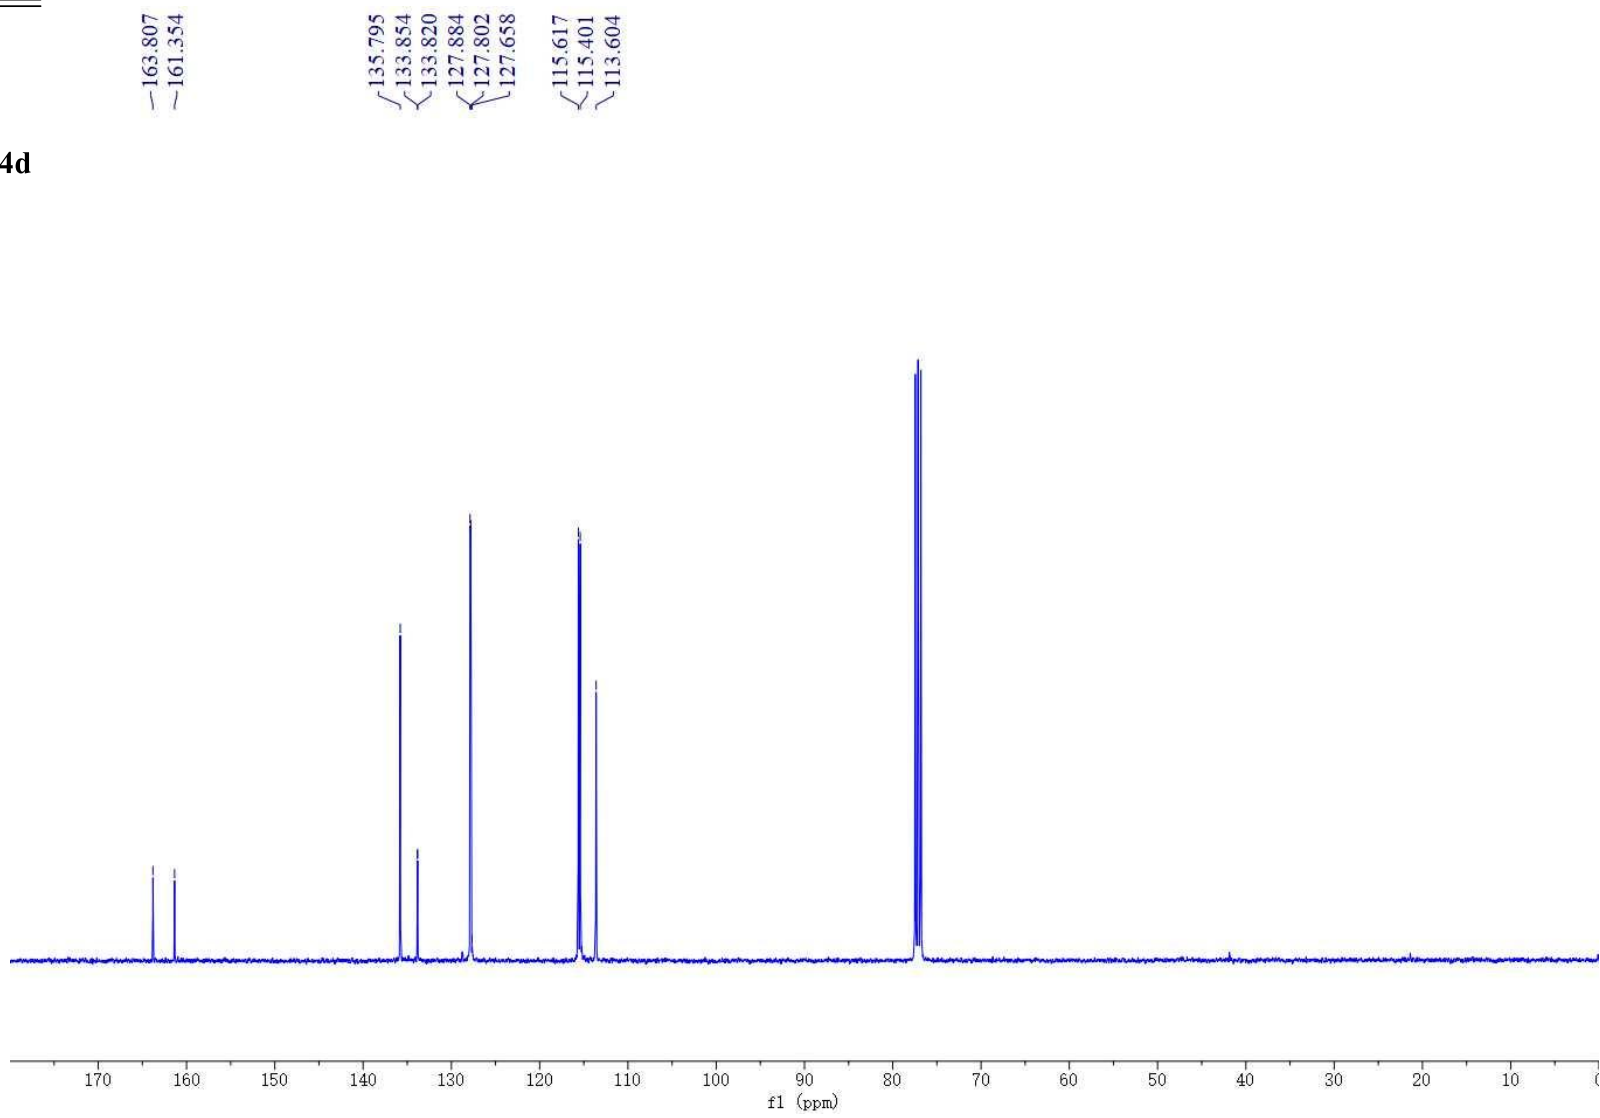

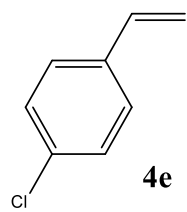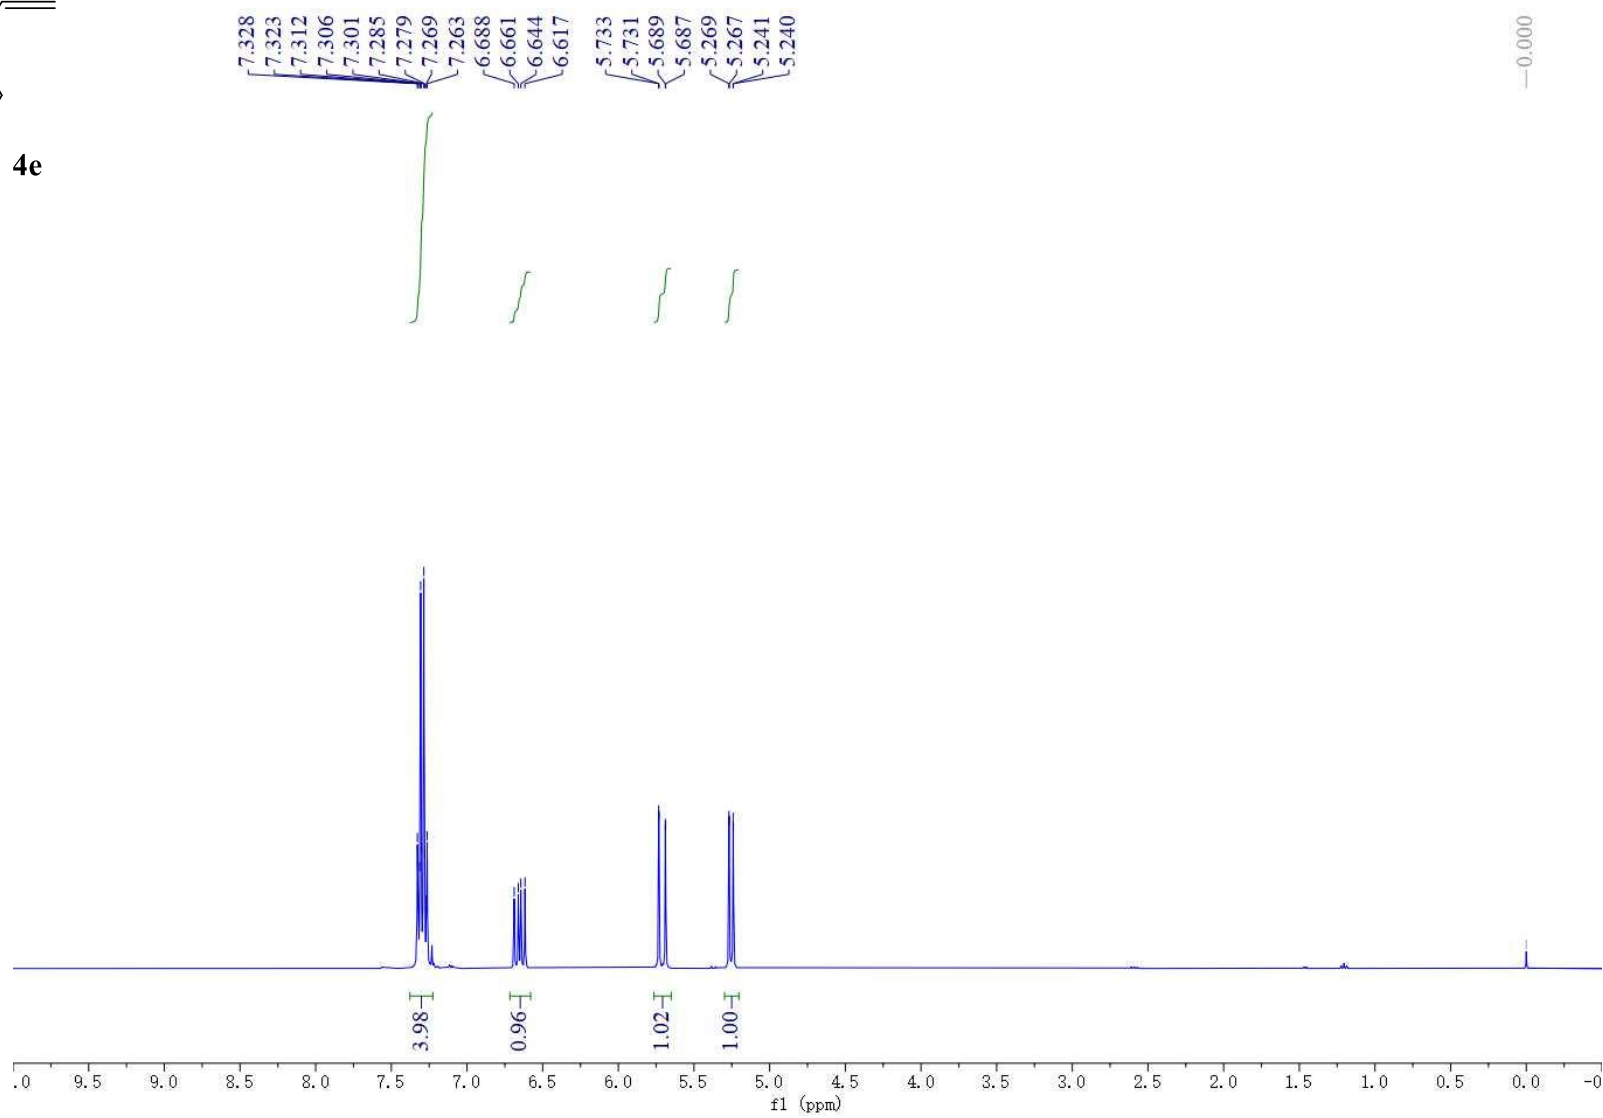

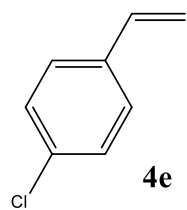

136.140  
135.776  
133.543  
128.789  
127.548  
— 114.572

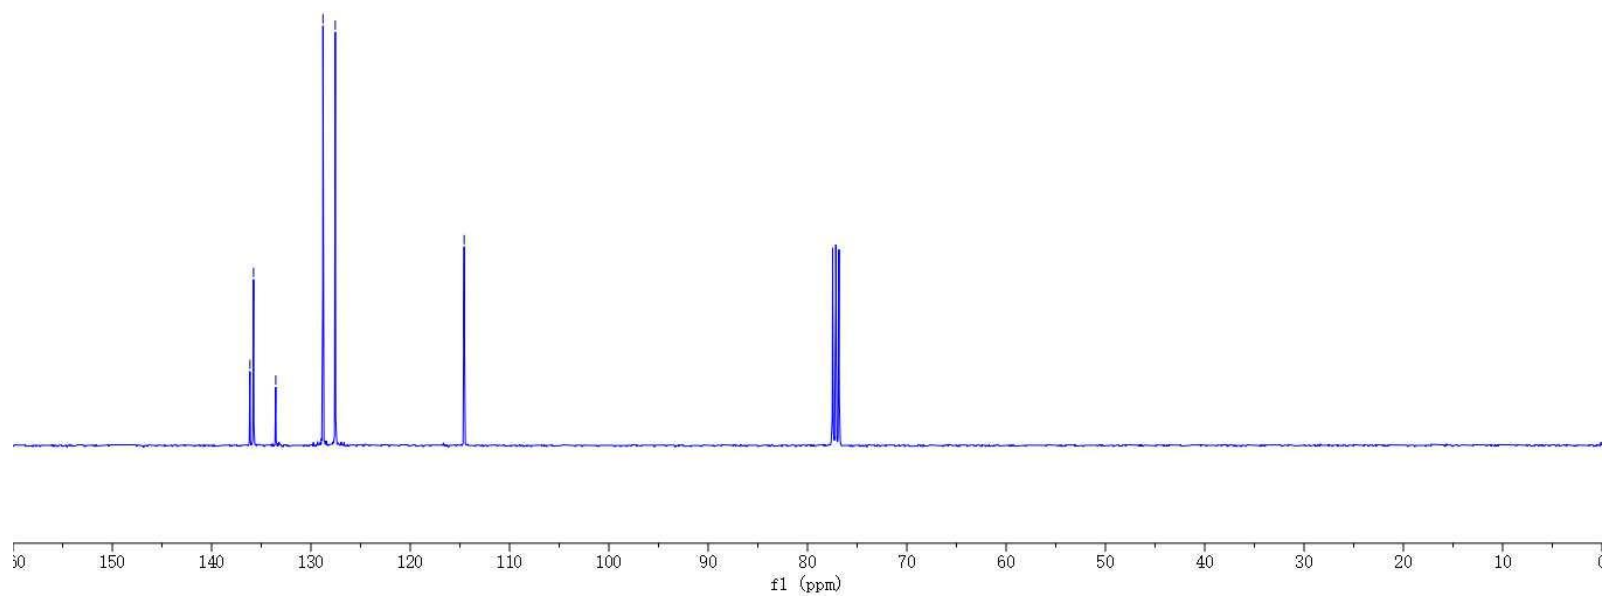

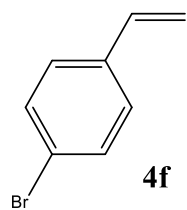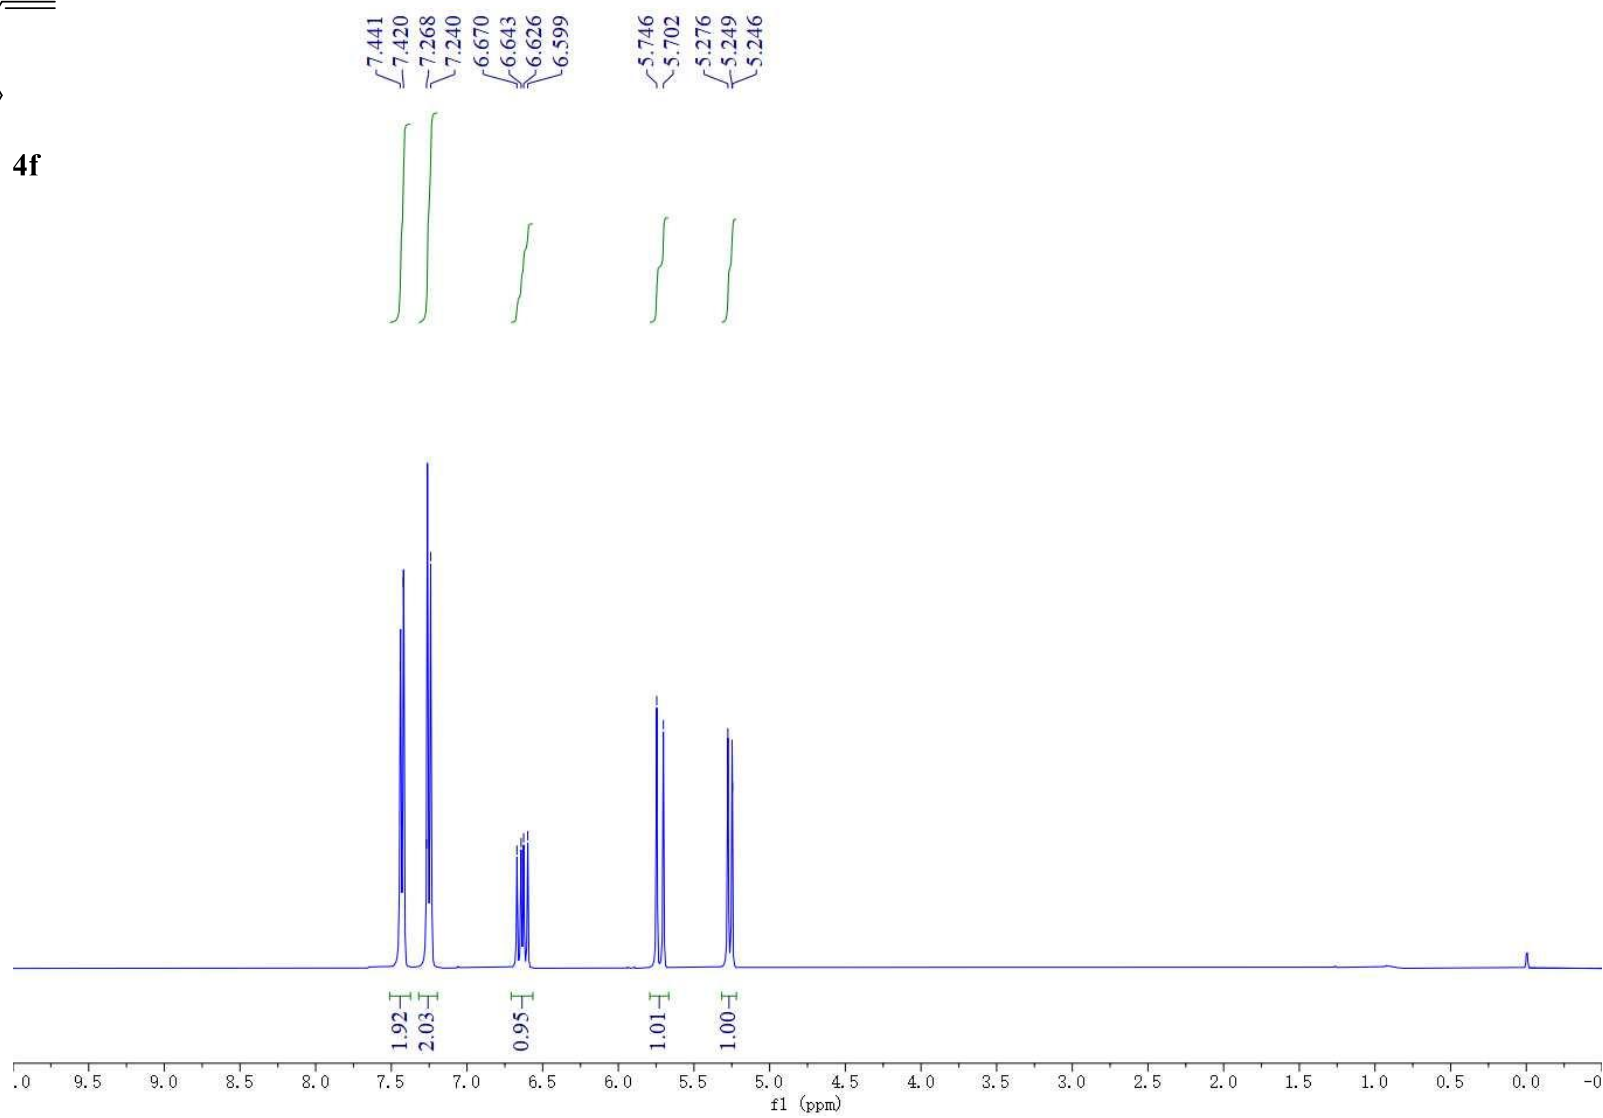

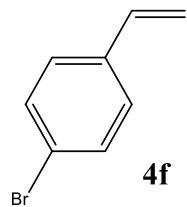

136.566  
135.838  
131.736  
127.879  
121.717  
114.725

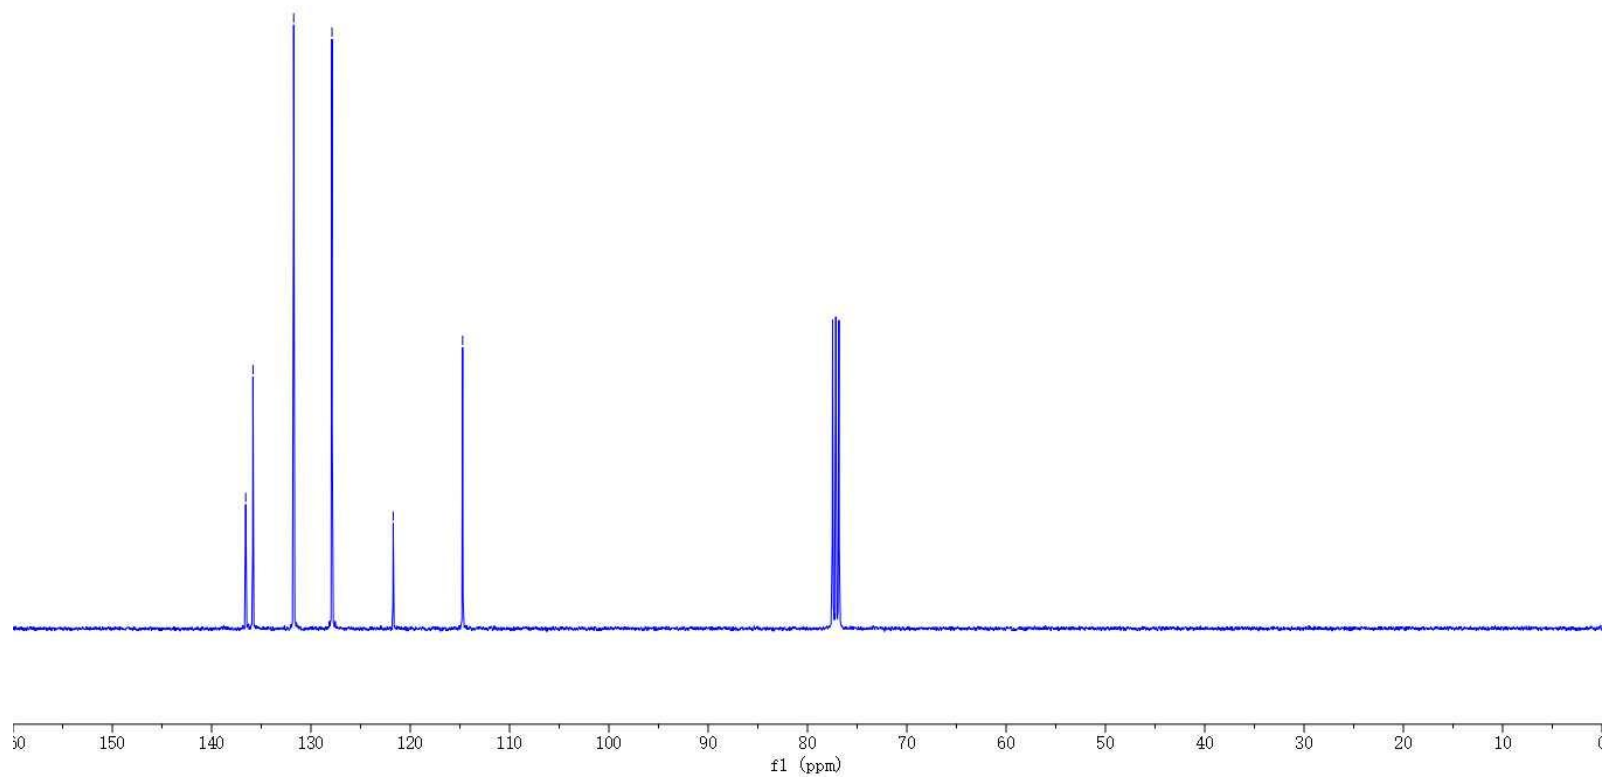

Supplement: Additional file 1 [file 1860-5397-22-79-S1.pdf]
